# Supplementary material for: Organocatalytic enantioselective direct vinylogous Michael addition of γ-substituted deconjugate butenolides to azadienes
Source: Royal Society of Chemistry journal article supplement (doi:10.1039/c9qo00597h), 2019-01-01
Supplement: c9qo00597h1.pdf [file c9qo00597h1.pdf]

## Supporting Information

Wei Lin,<sup>a</sup> Xiao Lin,<sup>a</sup> Yuyu Cheng,<sup>b</sup> Xiaoyong Chang,<sup>b</sup> San Zhou,<sup>a</sup> Pengfei Li,<sup>b\*</sup> and Wenjun Li<sup>a\*</sup>

<sup>a</sup> Department of Medicinal Chemistry, School of Pharmacy, Qingdao University, Qingdao, 266021, China

<sup>b</sup> Department of Chemistry and Shenzhen Grubbs Institute, Southern University of Science and Technology, Shenzhen, 518055, China

|                                                     |    |
|-----------------------------------------------------|----|
| A: General Information and Starting Materials ..... | 2  |
| B: General Procedure .....                          | 2  |
| C: Characterization Data .....                      | 3  |
| D: Gram Scale Reaction .....                        | 12 |
| E: Synthetic Transformations .....                  | 13 |
| F: HPLC Analysis .....                              | 16 |
| G: NMR Analysis .....                               | 37 |
| H: X-ray Analysis .....                             | 58 |
| I: Reference .....                                  | 62 |

## A: General Information and Starting Materials

**General Information.** Proton nuclear magnetic resonance ( $^1\text{H}$  NMR) spectra and carbon nuclear magnetic resonance ( $^{13}\text{C}$  NMR) spectra were recorded on a Bruker ACF300 spectrometer (500 MHz and 125 MHz). Chemical shifts for protons are reported in parts per million downfield from tetramethylsilane and are referenced to residual protium in the NMR solvent ( $\text{CDCl}_3$ :  $\delta$  7.26;  $(\text{CD}_3)_2\text{SO}$ :  $\delta$  2.50). Chemical shifts for carbon are reported in parts per million downfield from tetramethylsilane and are referenced to the carbon resonances of the solvent ( $\text{CDCl}_3$ :  $\delta$  77.0;  $(\text{CD}_3)_2\text{SO}$ :  $\delta$  39.50). Data are represented as follows: chemical shift, integration, multiplicity (br = broad, s = singlet, d = doublet, t = triplet, q = quartet, m = multiplet), coupling constants in Hertz (Hz). All high resolution mass spectra were obtained on a Finnigan/MAT 95XL-T mass spectrometer. For thin layer chromatography (TLC), Merck pre-coated TLC plates (Merck 60 F254) were used, and compounds were visualized with a UV light at 254 nm. Flash chromatography separations were performed on Merck 60 (0.040-0.063 mm) mesh silica gel.

**Starting Materials.** All solvents, inorganic reagents were from commercial sources and used without purification unless otherwise noted. Azadienes and Butenolides were prepared following the literature procedures.<sup>1,2</sup>

## B: General Procedure

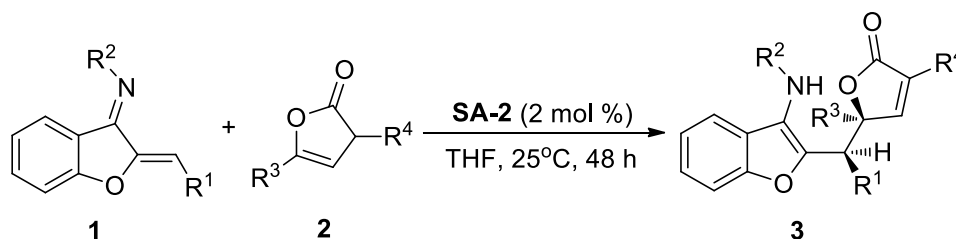

To a solution of THF (0.3 mL) were added azadienes **1** (0.05 mmol), butenolides **2** (0.06 mmol) and catalyst **SA-2** (0.001 mmol). The reaction mixture was stirred at 25 °C for 48 h and then the solvent was removed under vacuum. The residue was purified by silica gel chromatography to yield the desired product **3**.

## C: Characterization Data

### 4-Methyl-*N*-(2-((*R*)-((*S*)-2-methyl-5-oxo-2,5-dihydrofuran-2-yl)(phenyl)methyl)benzofuran-3-yl)benzenesulfonamide (3aa)

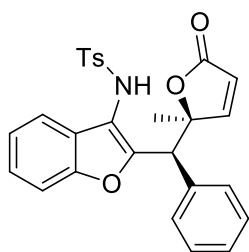

Eluent for flash column chromatography: petroleum ether/ethyl acetate = 6:1. White solid, 22.9 mg, 97% yield. mp 88.3-89.0 °C. <sup>1</sup>H NMR (CDCl<sub>3</sub>, 500 MHz): δ (ppm) 7.56 (d, *J* = 10.0 Hz, 2H), 7.48-7.44 (m, 2H), 7.42-7.40 (m, 2H), 7.29-7.25 (m, 2H), 7.22-7.19 (m, 1H), 7.09 (d, *J* = 10.0 Hz, 2H), 7.03-7.00 (m, 1H), 6.92-6.90 (m, 2H), 5.80 (d, *J* = 5.0 Hz, 1H), 4.75 (s, 1H), 2.34 (s, 3H), 1.44 (s, 3H). <sup>13</sup>C NMR (CDCl<sub>3</sub>, 125 MHz): δ (ppm) 172.1, 159.2, 153.3, 152.5, 144.0, 136.5, 134.9, 129.8, 129.7, 128.5, 127.9, 127.4, 125.1, 124.8, 123.2, 121.2, 118.9, 115.4, 111.7, 89.9, 49.7, 23.0, 21.5. HRMS (ESI): exact mass calculated for [M+H]<sup>+</sup> (C<sub>27</sub>H<sub>24</sub>NO<sub>5</sub>S) requires *m/z* 474.1375, found *m/z* 474.1370. The enantiomeric excess was determined to be 92% by HPLC. [IA column, 254 nm, *n*-hexane:EtOH = 80:20, 1.0 mL/min]: 22.6 min (minor), 19.8 min (major). [α]<sub>D</sub><sup>22</sup> = 34.00 (c = 1.00, CH<sub>2</sub>Cl<sub>2</sub>).

### *N*-(2-((*R*)-(4-fluorophenyl)((*S*)-2-methyl-5-oxo-2,5-dihydrofuran-2-yl)methyl)benzofuran-3-yl)-4-methylbenzenesulfonamide (3ba)

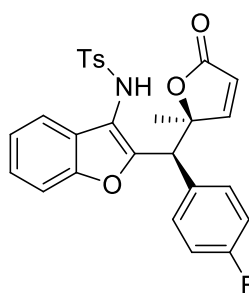

Eluent for flash column chromatography: petroleum ether/ethyl acetate = 5:1. White solid, 24.0 mg, 98% yield. mp 87.9-89.6 °C. <sup>1</sup>H NMR ((CD<sub>3</sub>)<sub>2</sub>SO, 500 MHz): δ (ppm) 9.87 (s, 1H), 7.82 (d, *J* = 5.0 Hz, 1H), 7.60 (d, *J* = 10.0 Hz, 1H), 7.40 (d, *J* = 10.0 Hz, 2H), 7.31-7.28 (m, 2H), 7.26-7.22 (m, 1H), 7.13 (d, *J* = 10.0 Hz, 2H), 7.06-6.99 (m, 4H), 5.94 (d, *J* = 5.0 Hz, 1H), 4.87 (s, 1H), 2.24 (s, 3H), 1.26 (s, 3H). <sup>13</sup>C NMR ((CD<sub>3</sub>)<sub>2</sub>SO, 125 MHz): δ (ppm) 172.5, 161.8, 161.7 (d, *J* = 970.0 Hz), 153.3, 151.5, 143.7, 137.1, 132.0, 131.9 (d, *J* = 30.0 Hz), 130.0, 127.2, 125.2 (d, *J* = 35.0 Hz), 123.3, 121.0, 120.1, 116.7, 115.2 (d, *J* = 35.0 Hz), 112.0, 110.0, 89.3, 47.1, 22.8, 21.4. HRMS (ESI): exact mass calculated for [M+H]<sup>+</sup> (C<sub>27</sub>H<sub>23</sub>FO<sub>5</sub>S) requires *m/z* 492.1281, found *m/z* 492.1277. The enantiomeric excess was determined to be 90% by HPLC. [IA column, 254 nm, *n*-hexane:EtOH = 80:20, 1.0 mL/min]: 13.6 min (minor), 12.0 min (major). [α]<sub>D</sub><sup>22</sup> = 30.00 (c = 1.00, CH<sub>2</sub>Cl<sub>2</sub>).

### *N*-(2-((*R*)-(4-chlorophenyl)((*S*)-2-methyl-5-oxo-2,5-dihydrofuran-2-yl)methyl)benzofuran-3-yl)-4-methylbenzenesulfonamide (3ca)

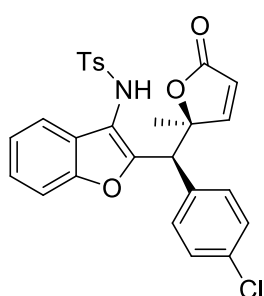

Eluent for flash column chromatography: petroleum ether/ethyl acetate = 5:1. White solid, 25.7 mg, >99% yield. mp 94.9-96.5 °C. <sup>1</sup>H NMR ((CD<sub>3</sub>)<sub>2</sub>SO, 500 MHz): δ (ppm) 9.87 (s, 1H), 7.80 (d, *J* = 10.0 Hz, 1H), 7.60 (d, *J* = 10.0 Hz, 1H), 7.38 (d, *J* = 10.0 Hz, 2H), 7.29-7.24 (m, 5H), 7.11-7.09 (m, 2H), 7.07-7.04 (m,

2H), 5.95 (d,  $J = 5.0$  Hz, 1H), 4.85 (s, 1H), 2.24 (s, 3H), 1.26 (s, 3H).  $^{13}\text{C}$  NMR ( $(\text{CD}_3)_2\text{SO}$ , 125 MHz):  $\delta$  (ppm) 172.4, 161.7, 153.4, 151.1, 143.7, 137.0, 134.7, 132.4, 131.7, 129.9, 128.3, 127.1, 125.3, 125.1, 123.4, 121.1, 120.2, 116.9, 112.0, 89.2, 47.2, 22.8, 21.4. HRMS (ESI): exact mass calculated for  $[\text{M}+\text{H}]^+$  ( $\text{C}_{27}\text{H}_{23}\text{ClNO}_5\text{S}$ ) requires  $m/z$  508.0985, found  $m/z$  508.0981. The enantiomeric excess was determined to be 84% by HPLC. [IA column, 254 nm,  $n$ -hexane:EtOH = 80:20, 1.0 mL/min]: 14.4 min (minor), 11.8 min (major).  $[\alpha]_{\text{D}}^{22} = 39.00$  ( $c = 1.00$ ,  $\text{CH}_2\text{Cl}_2$ ).

***N*-(2-((*R*)-(4-bromophenyl)((*S*)-2-methyl-5-oxo-2,5-dihydrofuran-2-yl)methyl)benzofuran-3-yl)-4-methylbenzenesulfonamide (3da)**

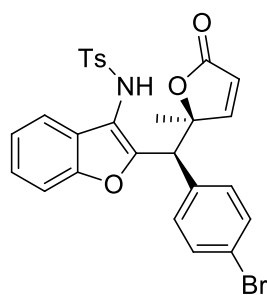

Eluent for flash column chromatography: petroleum ether/ethyl acetate = 6:1. White solid, 26.0 mg, 94% yield. mp 97.0-98.2 °C.  $^1\text{H}$  NMR ( $\text{CDCl}_3$ , 500 MHz):  $\delta$  (ppm) 7.53 (d,  $J = 5.0$  Hz, 2H), 7.46-7.40 (m, 4H), 7.32 (d,  $J = 10.0$  Hz, 2H), 7.24-7.20 (m, 1H), 7.09 (d,  $J = 5.0$  Hz, 2H), 7.02-6.99 (m, 1H), 6.84-6.79 (m, 2H), 5.84 (d,  $J = 5.0$  Hz, 1H), 4.78 (s, 1H), 2.35 (s, 3H), 1.45 (s, 3H).  $^{13}\text{C}$  NMR ( $\text{CDCl}_3$ , 125 MHz):  $\delta$  (ppm) 172.1, 159.2, 153.3, 151.9, 144.2, 136.2, 134.0, 131.6, 131.5, 129.7, 127.4, 125.0, 124.8, 123.3, 122.1, 121.5, 118.9, 115.7, 111.8, 89.6, 48.9, 22.8, 21.6. HRMS (ESI): exact mass calculated for  $[\text{M}+\text{H}]^+$  ( $\text{C}_{27}\text{H}_{23}\text{BrNO}_5\text{S}$ ) requires  $m/z$  552.0480, found  $m/z$  552.0477. The enantiomeric excess was determined to be 84% by HPLC. [IDA column, 254 nm,  $n$ -hexane:EtOH = 80:20, 1.0 mL/min]: 14.7 min (minor), 12.4 min (major).  $[\alpha]_{\text{D}}^{22} = 36.00$  ( $c = 1.00$ ,  $\text{CH}_2\text{Cl}_2$ ).

**4-Methyl-*N*-(2-((*R*)-(4-methoxyphenyl)((*S*)-2-methyl-5-oxo-2,5-dihydrofuran-2-yl)methyl)benzofuran-3-yl)benzenesulfonamide (3ea)**

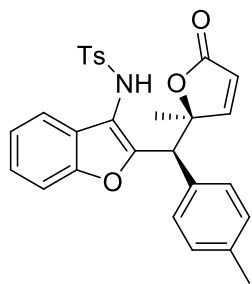

Eluent for flash column chromatography: petroleum ether/ethyl acetate = 6:1. White solid, 17.3 mg, 71% yield. mp 86.8-87.4 °C.  $^1\text{H}$  NMR ( $(\text{CD}_3)_2\text{SO}$ , 500 MHz):  $\delta$  (ppm) 9.83 (s, 1H), 7.80 (d,  $J = 5.0$  Hz, 1H), 7.58 (d,  $J = 10.0$  Hz, 1H), 7.43 (d,  $J = 10.0$  Hz, 2H), 7.24-7.20 (m, 1H), 7.17-7.13 (m, 4H), 7.05-7.00 (m, 3H), 6.95-6.94 (m, 1H), 5.92 (d,  $J = 5.0$  Hz, 1H), 4.80 (s, 1H), 2.25 (s, 3H), 2.22 (s, 3H), 1.28 (s, 3H).  $^{13}\text{C}$  NMR ( $(\text{CD}_3)_2\text{SO}$ , 125 MHz):  $\delta$  (ppm) 172.6, 161.8, 153.2, 152.2, 143.7, 137.3, 136.7, 132.8, 129.9, 129.8, 128.9, 127.2, 125.2, 125.1, 123.2, 120.9, 119.9, 116.4, 111.9, 89.5, 47.8, 23.0, 21.4, 21.1. HRMS (ESI): exact mass calculated for  $[\text{M}+\text{H}]^+$  ( $\text{C}_{28}\text{H}_{26}\text{NO}_5\text{S}$ ) requires  $m/z$  488.1532, found  $m/z$  488.1526. The enantiomeric excess was determined to be 91% by HPLC. [IA column, 254 nm,  $n$ -hexane:EtOH = 80:20, 1.0 mL/min]: 16.0 min (minor), 12.6 min (major).  $[\alpha]_{\text{D}}^{22} = 17.00$  ( $c = 1.00$ ,  $\text{CH}_2\text{Cl}_2$ ).

***N*-(2-((*R*)-(4-methoxyphenyl)((*S*)-2-methyl-5-oxo-2,5-dihydrofuran-2-yl)methyl)benzofuran-3-yl)-4-methylbenzenesulfonamide (3fa)**

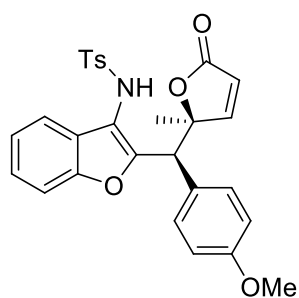

Eluent for flash column chromatography: petroleum ether/ethyl acetate = 6:1. White solid, 23.6 mg, 94% yield. mp 84.1-85.8 °C. <sup>1</sup>H NMR (CDCl<sub>3</sub>, 500 MHz): δ (ppm) 7.57 (d, *J* = 5.0 Hz, 2H), 7.46-7.43 (m, 2H), 7.32 (d, *J* = 10.0 Hz, 2H), 7.22-7.18 (m, 1H), 7.12 (d, *J* = 5.0 Hz, 2H), 7.02-6.99 (m, 1H), 6.86 (d, *J* = 10.0 Hz, 1H), 6.81 (d, *J* = 10.0 Hz, 2H), 6.64 (s, 1H), 5.81 (d, *J* = 5.0 Hz, 1H), 4.66 (s, 1H), 3.77 (s, 3H), 2.36 (s, 3H), 1.44 (s, 3H). <sup>13</sup>C NMR (CDCl<sub>3</sub>, 125 MHz): δ (ppm) 172.2, 159.4, 159.1, 153.3, 152.8, 144.0, 136.5, 130.9, 129.7, 127.4, 127.0, 125.1, 124.7, 123.2, 121.2, 118.9, 115.2, 113.8, 111.7, 90.1, 55.2, 48.9, 22.9, 21.5. HRMS (ESI): exact mass calculated for [M+H]<sup>+</sup> (C<sub>28</sub>H<sub>26</sub>NO<sub>6</sub>S) requires *m/z* 504.1481, found *m/z* 504.1473. The enantiomeric excess was determined to be 90% by HPLC. [IA column, 254 nm, *n*-hexane:EtOH = 80:20, 1.0 mL/min]: 19.9 min (minor), 15.8 min (major). [α]<sub>D</sub><sup>22</sup> = 14.00 (*c* = 1.00, CH<sub>2</sub>Cl<sub>2</sub>).

***N*-(2-((*R*)-(3-fluorophenyl)((*S*)-2-methyl-5-oxo-2,5-dihydrofuran-2-yl)methyl)benzofuran-3-yl)-4-methylbenzenesulfonamide (3ga)**

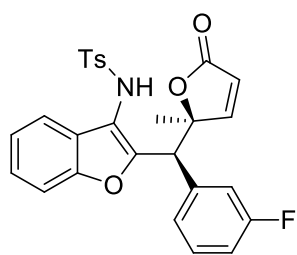

Eluent for flash column chromatography: petroleum ether/ethyl acetate = 5:1. White solid, 23.8 mg, 97% yield. mp 96.0-97.7 °C. <sup>1</sup>H NMR ((CD<sub>3</sub>)<sub>2</sub>SO, 500 MHz): δ (ppm) 9.90 (s, 1H), 7.85 (d, *J* = 5.0 Hz, 1H), 7.63 (d, *J* = 5.0 Hz, 1H), 7.40 (d, *J* = 10.0 Hz, 2H), 7.27-7.24 (m, 2H), 7.13-7.12 (m, 3H), 7.07-7.02 (m, 4H), 5.94 (d, *J* = 5.0 Hz, 1H), 4.87 (s, 1H), 2.24 (s, 3H), 1.27 (s, 3H). <sup>13</sup>C NMR ((CD<sub>3</sub>)<sub>2</sub>SO, 125 MHz): δ (ppm) 172.5, 165.3, 161.8 (d, *J* = 970.0 Hz), 161.7, 153.4, 151.0, 143.7, 138.3 (d, *J* = 30.0 Hz), 137.1, 130.2 (d, *J* = 35.0 Hz), 130.0, 127.2, 126.1, 125.2 (d, *J* = 100.0 Hz), 123.4, 121.0, 120.1, 117.0, 116.8 (d, *J* = 85.0 Hz), 114.6 (d, *J* = 85.0 Hz), 112.0, 89.2, 47.5, 22.9, 21.4. HRMS (ESI): exact mass calculated for [M+H]<sup>+</sup> (C<sub>27</sub>H<sub>23</sub>FNO<sub>5</sub>S) requires *m/z* 492.1281, found *m/z* 492.1274. The enantiomeric excess was determined to be 87% by HPLC. [ID column, 254 nm, *n*-hexane:EtOH = 80:20, 1.0 mL/min]: 12.6 min (minor), 11.0 min (major). [α]<sub>D</sub><sup>22</sup> = 30.00 (*c* = 1.00, CH<sub>2</sub>Cl<sub>2</sub>).

***N*-(2-((*R*)-(3-chlorophenyl)((*S*)-2-methyl-5-oxo-2,5-dihydrofuran-2-yl)methyl)benzofuran-3-yl)-4-methylbenzenesulfonamide (3ha)**

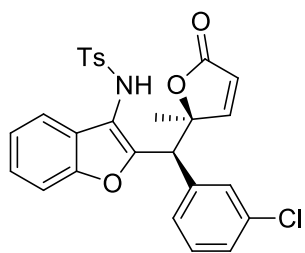

Eluent for flash column chromatography: petroleum ether/ethyl acetate = 5:1. White solid, 27.4 mg, 88% yield. mp 181.9-183.6 °C. <sup>1</sup>H NMR ((CD<sub>3</sub>)<sub>2</sub>SO, 500 MHz): δ (ppm) 9.91 (s, 1H), 7.85 (d, *J* = 5.0 Hz, 1H), 7.64 (d, *J* = 5.0 Hz, 1H), 7.40 (d, *J* = 10.0 Hz, 2H), 7.28-7.24 (m, 5H), 7.13 (d, *J* = 5.0 Hz, 2H), 7.09-7.06 (m, 1H), 7.03-7.02 (m, 1H), 5.96 (d, *J* = 5.0 Hz, 1H), 4.87 (s, 1H), 2.24 (s, 3H), 1.25 (s, 3H). <sup>13</sup>C NMR ((CD<sub>3</sub>)<sub>2</sub>SO, 125 MHz): δ (ppm) 172.5, 161.7, 153.4, 150.9, 143.7, 138.0, 137.0, 132.7, 130.1, 129.9, 129.7, 128.6, 127.7, 127.2, 125.4, 125.1, 123.4, 121.1.

120.2, 117.0, 112.1, 89.2, 47.5, 22.8, 21.4. HRMS (ESI): exact mass calculated for  $[M+H]^+$  ( $C_{27}H_{23}ClNO_5S$ ) requires  $m/z$  508.0985, found  $m/z$  508.0981. The enantiomeric excess was determined to be 90% by HPLC. [ID column, 254 nm, *n*-hexane:EtOH = 80:20, 1.0 mL/min]: 13.4 min (minor), 11.1 min (major).  $[\alpha]_D^{22} = 28.00$  ( $c = 1.00$ ,  $CH_2Cl_2$ ).

***N*-(2-((*R*)-(3-bromophenyl)((*S*)-2-methyl-5-oxo-2,5-dihydrofuran-2-yl)methyl)benzofuran-3-yl)-4-methylbenzenesulfonamide (3ia)**

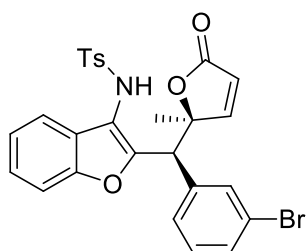

Eluent for flash column chromatography: petroleum ether/ethyl acetate = 6:1. White solid, 20.1 mg, 73% yield. mp 63.3-65.1 °C.  $^1H$  NMR ( $(CD_3)_2SO$ , 500 MHz):  $\delta$  (ppm) 9.91 (s, 1H), 7.85 (d,  $J = 5.0$  Hz, 1H), 7.64 (d,  $J = 5.0$  Hz, 1H), 7.43-7.39 (m, 4H), 7.30-7.24 (m, 2H), 7.20-7.17 (m, 1H), 7.13 (d,  $J = 10.0$  Hz, 2H), 7.09-7.06 (m, 1H), 7.02-7.01 (m, 1H), 5.96 (d,  $J = 5.0$  Hz, 1H), 4.87 (s, 1H), 2.24 (s, 3H), 1.25 (s, 3H).  $^{13}C$  NMR ( $(CD_3)_2SO$ , 125 MHz):  $\delta$  (ppm) 177.2, 166.5, 158.1, 155.6, 148.4, 143.0, 141.9, 137.3, 135.4, 135.2, 134.7, 133.7, 131.9, 130.1, 129.8, 128.1, 126.2, 125.9, 124.9, 116.8, 110.0, 93.9, 52.2, 27.6, 26.2. HRMS (ESI): exact mass calculated for  $[M+H]^+$  ( $C_{27}H_{23}BrNO_5S$ ) requires  $m/z$  552.0480, found  $m/z$  552.0477. The enantiomeric excess was determined to be 90% by HPLC. [ID column, 254 nm, *n*-hexane:EtOH = 80:20, 1.0 mL/min]: 14.6 min (minor), 11.8 min (major).  $[\alpha]_D^{22} = 33.00$  ( $c = 1.00$ ,  $CH_2Cl_2$ ).

**4-Methyl-*N*-(2-((*R*)-((*S*)-2-methyl-5-oxo-2,5-dihydrofuran-2-yl)(*m*-tolyl)methyl)benzofuran-3-yl)benzenesulfonamide (3ja)**

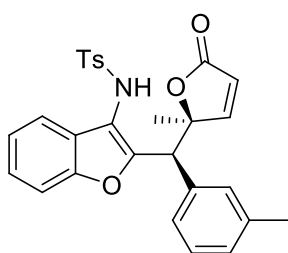

Eluent for flash column chromatography: petroleum ether/ethyl acetate = 6:1. White solid, 20.9 mg, 86% yield. mp 188.2-189.0 °C.  $^1H$  NMR ( $(CD_3)_2SO$ , 500 MHz):  $\delta$  (ppm) 9.83 (s, 1H), 7.80 (d,  $J = 5.0$  Hz, 1H), 7.60 (d,  $J = 10.0$  Hz, 1H), 7.45 (d,  $J = 5.0$  Hz, 2H), 7.24-7.21 (m, 1H), 7.16 (d,  $J = 5.0$  Hz, 2H), 7.09-7.08 (m, 3H), 7.05-7.01 (m, 2H), 6.93 (d,  $J = 10.0$  Hz, 1H), 5.92 (d,  $J = 5.0$  Hz, 1H), 4.81 (s, 1H), 2.25 (s, 3H), 2.22 (s, 3H), 1.28 (s, 3H).  $^{13}C$  NMR ( $(CD_3)_2SO$ , 125 MHz):  $\delta$  (ppm) 172.6, 161.8, 153.2, 152.1, 143.6, 137.4, 137.2, 135.8, 130.6, 129.9, 128.3, 128.2, 127.2, 127.0, 125.2, 125.1, 123.2, 120.9, 119.9, 116.4, 112.0, 89.4, 48.1, 23.1, 21.6, 21.4. HRMS (ESI): exact mass calculated for  $[M+H]^+$  ( $C_{28}H_{26}NO_5S$ ) requires  $m/z$  488.1532, found  $m/z$  488.1524. The enantiomeric excess was determined to be 91% by HPLC. [ID column, 254 nm, *n*-hexane:EtOH = 80:20, 1.0 mL/min]: 16.3 min (minor), 12.8 min (major).  $[\alpha]_D^{22} = 17.00$  ( $c = 1.00$ ,  $CH_2Cl_2$ ).

***N*-(2-((*R*)-(3-methoxyphenyl)((*S*)-2-methyl-5-oxo-2,5-dihydrofuran-2-yl)methyl)benzofuran-3-yl)-4-methylbenzenesulfonamide (3ka)**

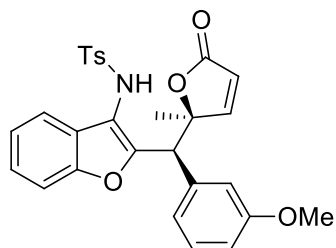

Eluent for flash column chromatography: petroleum ether/ethyl acetate = 5:1. White solid, 20.6 mg, 82% yield. mp 175.8-176.9 °C. <sup>1</sup>H NMR ((CD<sub>3</sub>)<sub>2</sub>SO, 500 MHz): δ (ppm) 9.85 (s, 1H), 7.83 (d, *J* = 5.0 Hz, 1H), 7.60 (d, *J* = 10.0 Hz, 1H), 7.44 (d, *J* = 10.0 Hz, 2H), 7.24-7.21 (m, 1H), 7.16-7.11 (m, 3H), 7.04-7.01 (m, 1H), 6.92 (d, *J* = 5.0 Hz, 1H), 6.87-6.85 (m, 2H), 6.78-6.76 (m, 1H), 5.93 (d, *J* = 5.0 Hz, 1H), 4.83 (s, 1H), 3.69 (s, 3H), 2.25 (s, 3H), 1.29 (s, 3H). <sup>13</sup>C NMR ((CD<sub>3</sub>)<sub>2</sub>SO, 125 MHz): δ (ppm) 172.7, 161.9, 159.0, 153.2, 151.9, 143.7, 137.3, 137.2, 130.0, 129.3, 127.2, 125.2, 125.1, 123.2, 122.2, 120.8, 119.9, 116.6, 116.2, 112.6, 112.0, 89.4, 55.3, 48.0, 23.1, 21.4. HRMS (ESI): exact mass calculated for [M+H]<sup>+</sup> (C<sub>28</sub>H<sub>26</sub>NO<sub>6</sub>S) requires *m/z* 504.1481, found *m/z* 504.1474. The enantiomeric excess was determined to be 90% by HPLC. [ID column, 254 nm, *n*-hexane:EtOH = 60:40, 1.0 mL/min]: 11.2 min (minor), 7.1 min (major). [α]<sup>22</sup><sub>D</sub> = 16.00 (*c* = 1.00, CH<sub>2</sub>Cl<sub>2</sub>).

**4-Methyl-N-(2-((R)-((S)-2-methyl-5-oxo-2,5-dihydrofuran-2-yl)(o-tolyl)methyl)benzofuran-3-yl)benzenesulfonamide (3la)**

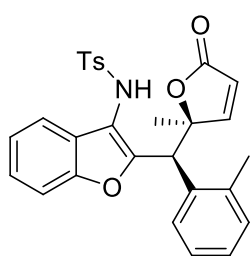

Eluent for flash column chromatography: petroleum ether/ethyl acetate = 6:1. White solid, 13.7 mg, 56% yield. mp 67.3-68.7 °C. <sup>1</sup>H NMR ((CD<sub>3</sub>)<sub>2</sub>SO, 500 MHz): δ (ppm) 9.86 (s, 1H), 7.93 (d, *J* = 5.0 Hz, 1H), 7.65-7.63 (m, 1H), 7.58-7.56 (m, 1H), 7.48 (d, *J* = 10.0 Hz, 2H), 7.25-7.19 (m, 3H), 7.10-7.04 (m, 3H), 7.01-6.97 (m, 1H), 6.70 (d, *J* = 5.0 Hz, 1H), 5.96 (d, *J* = 5.0 Hz, 1H), 5.23 (s, 1H), 2.41 (s, 3H), 2.30 (s, 3H), 1.41 (s, 3H). <sup>13</sup>C NMR ((CD<sub>3</sub>)<sub>2</sub>SO, 125 MHz): δ (ppm) 172.6, 160.7, 153.3, 153.2, 143.8, 137.6, 136.4, 134.3, 130.8, 130.0, 129.7, 127.6, 127.1, 125.9, 125.1, 125.0, 123.2, 121.4, 119.6, 116.1, 112.0, 89.7, 43.0, 23.0, 21.4, 20.7. HRMS (ESI): exact mass calculated for [M+Na]<sup>+</sup> (C<sub>28</sub>H<sub>25</sub>NO<sub>5</sub>SNa) requires *m/z* 510.1346, found *m/z* 510.1344. The enantiomeric excess was determined to be 98% by HPLC. [IC column, 254 nm, *n*-hexane:EtOH = 80:20, 1.0 mL/min]: 8.3 min (minor), 9.7 min (major). [α]<sup>22</sup><sub>D</sub> = 10.00 (*c* = 0.50, CH<sub>2</sub>Cl<sub>2</sub>).

**4-Methyl-N-(2-((R)-((S)-2-methyl-5-oxo-2,5-dihydrofuran-2-yl)(thiophen-2-yl)methyl)benzofuran-3-yl)benzenesulfonamide (3ma)**

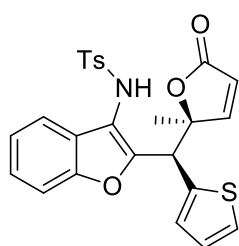

Eluent for flash column chromatography: petroleum ether/ethyl acetate = 6:1. White solid, 23.9 mg, >99% yield. mp 81.7-83.5 °C. <sup>1</sup>H NMR ((CD<sub>3</sub>)<sub>2</sub>SO, 500 MHz): δ (ppm) 9.91 (s, 1H), 7.82 (d, *J* = 5.0 Hz, 1H), 7.56 (d, *J* = 10.0 Hz, 1H), 7.47 (d, *J* = 10.0 Hz, 2H), 7.37-7.36 (m, 1H), 7.24-7.20 (m, 1H), 7.18 (d, *J* = 10.0 Hz, 2H), 7.04-7.01 (m, 1H), 6.91-6.87 (m, 3H), 6.01 (d, *J* = 5.0 Hz, 1H), 5.25 (s, 1H), 2.27 (s, 3H), 1.32 (s, 3H). <sup>13</sup>C NMR ((CD<sub>3</sub>)<sub>2</sub>SO, 125 MHz): δ (ppm) 172.6, 161.4, 153.1, 150.8, 143.8, 137.3, 136.6, 130.0, 128.4,

127.2, 126.6, 126.4, 125.3, 125.1, 123.3, 121.2, 119.9, 116.4, 112.0, 89.2, 43.6 22.8, 21.4. HRMS (ESI): exact mass calculated for  $[M+H]^+$  ( $C_{25}H_{22}NO_5S_2$ ) requires  $m/z$  480.0939, found  $m/z$  480.0932. The enantiomeric excess was determined to be 90% by HPLC. [ID column, 254 nm, *n*-hexane:EtOH = 80:20, 1.0 mL/min]: 20.4 min (minor), 16.5 min (major).  $[\alpha]_D^{22} = 7.00$  ( $c = 1.00$ ,  $CH_2Cl_2$ ).

***N*-(2-((*R*)-((*S*)-2-methyl-5-oxo-2,5-dihydrofuran-2-yl)(phenyl)methyl)benzofuran-3-yl)benzenesulfonamide (3na)**

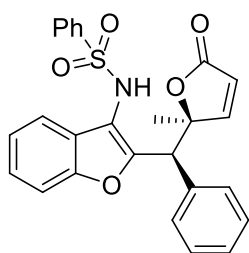

Eluent for flash column chromatography: petroleum ether/ethyl acetate = 6:1. White solid, 201.5 mg, 94% yield. mp 97.4-98.5 °C.  $^1H$  NMR ( $(CD_3)_2SO$ , 500 MHz):  $\delta$  (ppm) 9.95 (s, 1H) 7.87 (d,  $J = 5.0$  Hz, 1H), 7.59 (d,  $J = 10.0$  Hz, 3H), 7.53-7.50 (m, 1H), 7.40-7.34 (m, 4H), 7.24-7.19 (m, 4H), 6.99-6.96 (m, 1H), 6.78 (d,  $J = 5.0$  Hz, 1H), 5.91 (d,  $J = 5.0$  Hz, 1H), 4.91 (s, 1H), 1.31 (s, 3H).  $^{13}C$  NMR ( $(CD_3)_2SO$ , 125 MHz):  $\delta$  (ppm) 172.6, 161.9, 153.2, 152.4, 140.4, 135.9, 133.4, 130.0, 129.6, 128.4, 127.7, 127.2, 125.1, 123.3, 120.9, 119.6, 116.4, 112.0, 89.4, 48.2, 23.1. HRMS (ESI): exact mass calculated for  $[M+H]^+$  ( $C_{26}H_{22}NO_5S$ ) requires  $m/z$  460.1219, found  $m/z$  460.1209. The enantiomeric excess was determined to be 86% by HPLC. [ID column, 254 nm, *n*-hexane:EtOH = 80:20, 1.0 mL/min]: 15.0 min (minor), 12.2 min (major).  $[\alpha]_D^{22} = 39.00$  ( $c = 1.00$ ,  $CH_2Cl_2$ ).

***N*-(2-((*R*)-((*S*)-2-ethyl-5-oxo-2,5-dihydrofuran-2-yl)(phenyl)methyl)benzofuran-3-yl)-4-methylbenzenesulfonamide (3ab)**

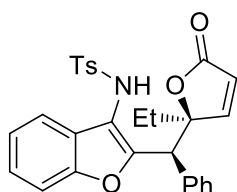

Eluent for flash column chromatography: petroleum ether/ethyl acetate = 6:1. White solid, 23.9 mg, 98% yield. mp 73.6-75.4 °C.  $^1H$  NMR ( $(CD_3)_2SO$ , 500 MHz):  $\delta$  (ppm) 9.87 (s, 1H), 7.73 (d,  $J = 5.0$  Hz, 1H), 7.58 (d,  $J = 10.0$  Hz, 1H), 7.44 (d,  $J = 10.0$  Hz, 2H), 7.32-7.30 (m, 2H), 7.23-7.20 (m, 4H), 7.16 (d,  $J = 10.0$  Hz, 2H), 7.04-7.01 (m, 1H), 6.93 (d,  $J = 5.0$  Hz, 1H), 5.96 (d,  $J = 5.0$  Hz, 1H), 4.88 (s, 1H), 2.26 (s, 3H), 1.78-1.74 (m, 1H), 1.50-1.46 (m, 1H), 0.59 (t,  $J = 10.0$  Hz, 3H).  $^{13}C$  NMR ( $(CD_3)_2SO$ , 125 MHz):  $\delta$  (ppm) 172.8, 160.1, 153.2, 151.9, 143.7, 137.4, 135.7, 130.1, 130.0, 128.3, 127.6, 127.2, 125.2, 125.1, 123.2, 122.3, 119.9, 116.6, 112.0, 92.2, 47.9, 27.9, 21.4, 7.8. HRMS (ESI): exact mass calculated for  $[M+H]^+$  ( $C_{28}H_{26}NO_5S$ ) requires  $m/z$  488.1532, found  $m/z$  488.1524. The enantiomeric excess was determined to be 90% by HPLC. [IA column, 254 nm, *n*-hexane:EtOH = 80:20, 1.0 mL/min]: 12.8 min (minor), 11.0 min (major).  $[\alpha]_D^{22} = 18.00$  ( $c = 1.00$ ,  $CH_2Cl_2$ ).

***N*-(2-((*R*)-((*S*)-2-benzyl-5-oxo-2,5-dihydrofuran-2-yl)(phenyl)methyl)benzofuran-3-yl)-4-methylbenzenesulfonamide (3ac)**

Eluent for flash column chromatography: petroleum ether/ethyl acetate = 6:1. White solid, 26.1 mg, 95% yield. mp 99.4-101.1 °C.  $^1H$  NMR ( $(CD_3)_2SO$ , 500 MHz):  $\delta$  (ppm)



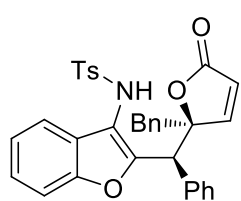

9.95 (s, 1H), 7.76 (d,  $J = 5.0$  Hz, 1H), 7.67 (d,  $J = 5.0$  Hz, 1H), 7.47 (d,  $J = 10.0$  Hz, 2H), 7.36-7.35 (m, 2H), 7.27-7.20 (m, 4H), 7.17-7.11 (m, 5H), 7.06-7.03 (m, 1H), 6.96-6.94 (m, 3H), 5.59 (d,  $J = 5.0$  Hz, 1H), 5.04 (s, 1H), 3.16 (d,  $J = 15.0$  Hz, 1H), 2.72 (d,  $J = 15.0$  Hz, 1H), 2.24 (s, 3H).  $^{13}\text{C}$  NMR ( $(\text{CD}_3)_2\text{SO}$ , 125 MHz):  $\delta$  (ppm) 172.4, 159.9, 153.4, 151.8, 143.8, 137.4, 135.7, 134.8, 130.7, 130.1, 130.0, 128.4, 128.2, 127.7, 127.3, 127.1, 125.2, 125.1, 123.3, 122.3, 120.0, 116.9, 112.1, 91.3, 48.2, 41.0, 21.4. HRMS (ESI): exact mass calculated for  $[\text{M}+\text{H}]^+$  ( $\text{C}_{33}\text{H}_{28}\text{NO}_5\text{S}$ ) requires  $m/z$  550.1688, found  $m/z$  550.1681. The enantiomeric excess was determined to be 74% by HPLC. [IA column, 254 nm, *n*-hexane:EtOH = 80:20, 1.0 mL/min]: 12.1 min (minor), 13.8 min (major).  $[\alpha]_D^{22} = 36.00$  ( $c = 1.00$ ,  $\text{CH}_2\text{Cl}_2$ ).

**4-Methyl-N-(2-((R)-((S)-5-oxo-2-propyl-2,5-dihydrofuran-2-yl)(phenyl)methyl)benzenesulfonamide (3ad)**

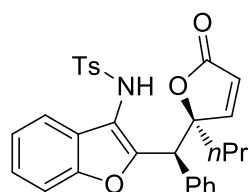

Eluent for flash column chromatography: petroleum ether/ethyl acetate = 6:1. White solid, 17.5 mg, 70% yield. mp 76.7-78.2 °C.  $^1\text{H}$  NMR ( $(\text{CD}_3)_2\text{SO}$ , 500 MHz):  $\delta$  (ppm) 9.89 (s, 1H), 7.76 (d,  $J = 5.0$  Hz, 1H), 7.58 (d,  $J = 10.0$  Hz, 1H), 7.45 (d,  $J = 5.0$  Hz, 2H), 7.32-7.31 (m, 2H), 7.23-7.19 (m, 4H), 7.17 (d,  $J = 5.0$  Hz, 2H), 7.04-7.01 (m, 1H), 6.93 (d,  $J = 10.0$  Hz, 1H), 5.94 (d,  $J = 5.0$  Hz, 1H), 4.88 (s, 1H), 2.26 (s, 3H), 1.77-1.72 (m, 1H), 1.44-1.38 (m, 1H), 1.03-0.95 (m, 2H), 0.71 (t,  $J = 5.0$  Hz, 3H).  $^{13}\text{C}$  NMR ( $(\text{CD}_3)_2\text{SO}$ , 125 MHz):  $\delta$  (ppm) 172.8, 160.4, 153.2, 151.9, 143.7, 137.4, 135.6, 130.2, 130.0, 128.3, 127.6, 127.2, 125.2, 125.1, 123.2, 121.9, 119.9, 116.6, 112.0, 91.9, 48.1, 36.9, 21.4, 16.7, 14.4. HRMS (ESI): exact mass calculated for  $[\text{M}+\text{H}]^+$  ( $\text{C}_{29}\text{H}_{28}\text{NO}_5\text{S}$ ) requires  $m/z$  502.1688, found  $m/z$  502.1680. The enantiomeric excess was determined to be 92% by HPLC. [ID column, 254 nm, *n*-hexane:IPA = 80:20, 1.0 mL/min]: 29.0 min (minor), 23.3 min (major).  $[\alpha]_D^{22} = 26.00$  ( $c = 1.00$ ,  $\text{CH}_2\text{Cl}_2$ ).

**4-Methyl-N-(2-((R)-((S)-5-oxo-2-phenyl-2,5-dihydrofuran-2-yl)(phenyl)methyl)benzenesulfonamide (3ae)**

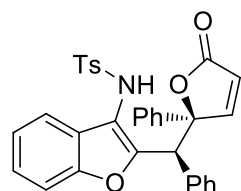

Eluent for flash column chromatography: petroleum ether/ethyl acetate = 6:1. White solid, 23.6 mg, 88% yield. mp 107.5-109.1 °C.  $^1\text{H}$  NMR ( $(\text{CD}_3)_2\text{SO}$ , 500 MHz):  $\delta$  (ppm) 9.42 (s, 1H), 8.42 (d,  $J = 5.0$  Hz, 1H), 7.52 (d,  $J = 10.0$  Hz, 1H), 7.49 (d,  $J = 5.0$  Hz, 2H), 7.45-7.43 (m, 2H), 7.24-7.20 (m, 7H), 7.18-7.16 (m, 1H), 7.13-7.10 (m, 1H), 7.02 (d,  $J = 10.0$  Hz, 2H), 6.88-6.85 (m, 1H), 6.68 (d,  $J = 10.0$  Hz, 1H), 5.95 (d,  $J = 5.0$  Hz, 1H), 5.46 (s, 1H), 2.18 (s, 3H).  $^{13}\text{C}$  NMR ( $(\text{CD}_3)_2\text{SO}$ , 125 MHz):  $\delta$  (ppm) 172.4, 161.2, 152.9, 151.6, 143.4, 138.4, 137.1, 135.5, 130.5, 129.7, 128.6, 128.3, 128.2, 127.7, 127.1, 125.7, 124.8, 124.7, 122.8, 120.1, 119.5, 116.3, 111.6, 92.4, 49.8, 21.3. HRMS (ESI): exact mass calculated for  $[\text{M}+\text{H}]^+$  ( $\text{C}_{32}\text{H}_{26}\text{NO}_5\text{S}$ ) requires  $m/z$  536.1532, found  $m/z$  536.1525. The enantiomeric excess was determined

to be 91% by HPLC. [IA column, 254 nm, *n*-hexane:EtOH = 80:20, 1.0 mL/min]: 15.3 min (minor), 10.9 min (major).  $[\alpha]_D^{22} = 106.00$  ( $c = 1.00$ , CH<sub>2</sub>Cl<sub>2</sub>).

***N*-2-((*R*)-((*S*)-2-(4-fluorophenyl)-5-oxo-2,5-dihydrofuran-2-yl)(phenyl)methyl)benzofuran-3-yl)-4-methylbenzenesulfonamide (3af)**

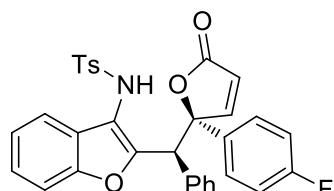

Eluent for flash column chromatography: petroleum ether/ethyl acetate = 5:1. Yellow solid, 22.9 mg, 83% yield. mp 94.6-96.3 °C. <sup>1</sup>H NMR ((CD<sub>3</sub>)<sub>2</sub>SO, 500 MHz):  $\delta$  (ppm) 9.41 (s, 1H), 8.45 (d,  $J = 5.0$  Hz, 1H), 7.54-7.50 (m, 3H), 7.47 (d,  $J = 5.0$  Hz, 2H), 7.27-7.22 (m, 5H), 7.15-7.11 (s, 1H), 7.07-7.03 (m, 4H), 6.89-6.86 (m, 1H), 6.65 (d,  $J = 5.0$  Hz, 1H), 5.97 (d,  $J = 5.0$  Hz, 1H), 5.42 (s, 1H), 2.19 (s, 3H). <sup>13</sup>C NMR ((CD<sub>3</sub>)<sub>2</sub>SO, 125 MHz):  $\delta$  (ppm) 172.2, 162.9, 160.9, 152.3 (d,  $J = 720.0$  Hz), 143.5, 137.1, 135.3, 134.7, 130.5, 129.7, 128.2, 127.9 (d,  $J = 30.0$  Hz), 127.7, 127.1, 124.7 (d,  $J = 125.0$  Hz), 122.9, 120.3, 119.5, 116.4, 115.5 (d,  $J = 85.0$  Hz), 111.7, 92.1, 50.0, 21.3. HRMS (ESI): exact mass calculated for [M+H]<sup>+</sup> (C<sub>32</sub>H<sub>25</sub>FNO<sub>5</sub>S) requires  $m/z$  554.1437, found  $m/z$  554.1433. The enantiomeric excess was determined to be 91% by HPLC. [IA column, 254 nm, *n*-hexane:EtOH = 80:20, 1.0 mL/min]: 14.1 min (minor), 10.5 min (major).  $[\alpha]_D^{22} = 87.00$  ( $c = 1.00$ , CH<sub>2</sub>Cl<sub>2</sub>).

***N*-2-((*R*)-((*S*)-2-(4-methoxyphenyl)-5-oxo-2,5-dihydrofuran-2-yl)(phenyl)methyl)benzofuran-3-yl)-4-methylbenzenesulfonamide (3ag)**

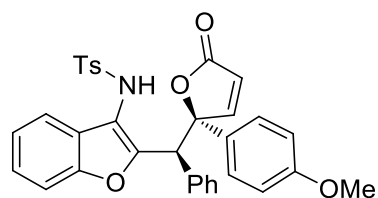

Eluent for flash column chromatography: petroleum ether/ethyl acetate = 5:1. White solid, 26.3 mg, 93% yield. mp 87.3-88.8 °C. <sup>1</sup>H NMR ((CD<sub>3</sub>)<sub>2</sub>SO, 500 MHz):  $\delta$  (ppm) 9.44 (s, 1H), 8.39 (d,  $J = 5.0$  Hz, 1H), 7.52 (d,  $J = 10.0$  Hz, 1H), 7.43 (d,  $J = 5.0$  Hz, 2H), 7.38 (d,  $J = 5.0$  Hz, 2H), 7.25-7.21 (m, 5H), 7.14-7.11 (m, 1H), 7.04 (d,  $J = 5.0$  Hz, 2H), 6.90-6.87 (m, 1H), 6.77 (d,  $J = 10.0$  Hz, 2H), 6.70 (d,  $J = 5.0$  Hz, 1H), 5.92 (d,  $J = 5.0$  Hz, 1H), 5.41 (s, 1H), 3.64 (s, 3H), 2.19 (s, 3H). <sup>13</sup>C NMR ((CD<sub>3</sub>)<sub>2</sub>SO, 125 MHz):  $\delta$  (ppm) 172.5, 161.4, 159.1, 152.9, 151.8, 143.4, 137.1, 135.7, 130.5, 130.3, 129.7, 128.2, 127.6, 127.2, 127.1, 127.0, 124.8, 122.8, 119.8, 119.5, 116.3, 113.9, 111.7, 92.3, 55.5, 49.9, 21.4. HRMS (ESI): exact mass calculated for [M+H]<sup>+</sup> (C<sub>33</sub>H<sub>28</sub>NO<sub>6</sub>S) requires  $m/z$  566.1632, found  $m/z$  566.1631. The enantiomeric excess was determined to be 91% by HPLC. [IA column, 254 nm, *n*-hexane:EtOH = 80:20, 1.0 mL/min]: 24.7 min (minor), 13.3 min (major).  $[\alpha]_D^{22} = 67.00$  ( $c = 1.00$ , CH<sub>2</sub>Cl<sub>2</sub>).

***N*-2-((*R*)-((*S*)-2-ethyl-4-methyl-5-oxo-2,5-dihydrofuran-2-yl)(phenyl)methyl)benzofuran-3-yl)-4-methylbenzenesulfonamide (3ah)**

Eluent for flash column chromatography: petroleum ether/ethyl acetate = 7:1. White solid, 24.9 mg, 99% yield. mp 81.2-82.2 °C. <sup>1</sup>H NMR ((CD<sub>3</sub>)<sub>2</sub>SO, 500 MHz):  $\delta$  (ppm) 9.85 (s, 1H), 7.58 (d,  $J = 5.0$  Hz, 1H), 7.43 (d,  $J = 5.0$  Hz, 2H), 7.27-7.19 (m, 7H),

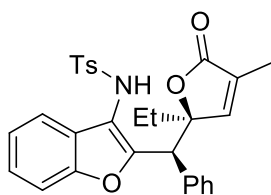

7.14 (d,  $J = 5.0$  Hz, 2H), 7.06-7.03 (m, 1H), 7.00-6.98 (m, 1H), 4.80 (s, 1H), 2.24 (s, 3H), 1.73-1.68 (m, 1H), 1.51 (s, 3H), 1.47-1.43 (m, 1H), 0.57 (t,  $J = 10.0$  Hz, 3H).  $^{13}\text{C}$  NMR ( $(\text{CD}_3)_2\text{SO}$ , 125 MHz):  $\delta$  (ppm) 173.6, 153.2, 152.0, 151.9, 143.6, 137.3, 135.9, 130.2, 130.1, 129.9, 128.2, 127.5, 127.2, 125.3, 125.0, 123.2, 120.0, 116.5, 111.9, 89.8, 48.2, 27.9, 21.4,

10.4, 7.8. HRMS (ESI): exact mass calculated for  $[\text{M}+\text{H}]^+$  ( $\text{C}_{29}\text{H}_{28}\text{NO}_5\text{S}$ ) requires  $m/z$  502.1688, found  $m/z$  502.1681. The enantiomeric excess was determined to be 17% by HPLC. [ID column, 254 nm, *n*-hexane:EtOH = 80:20, 1.0 mL/min]: 13.8 min (minor), 11.0 min (major).  $[\alpha]_{\text{D}}^{22} = 4.00$  ( $c = 1.00$ ,  $\text{CH}_2\text{Cl}_2$ ).

## D: Gram Scale Reaction

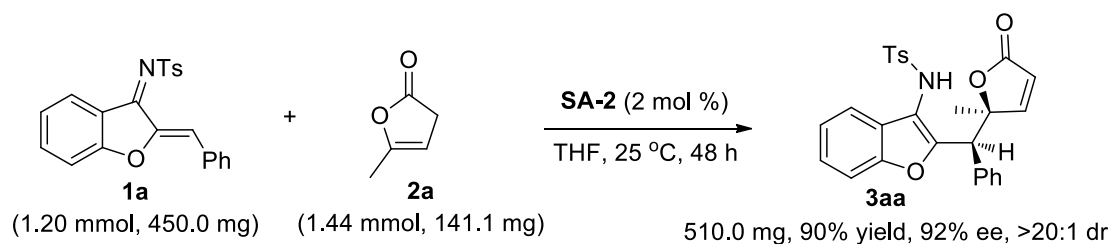

To a solution of THF (7.2 mL) were added azadiene **1a** (450.0 mg, 1.2 mmol), butenolide **2a** (141.1 mg, 1.44 mmol) and catalyst **SA-2** (15.12 mg, 0.024 mmol). The reaction mixture was stirred at 25 °C for 48 h. The solvent was evaporated to give the crude product, which was purified by silica gel chromatography (PE/EA = 6:1) to provide the desired product **3aa** as a white solid (510.0 mg, 90% yield, 92% ee, >20:1 dr).

## E: Synthetic Transformations

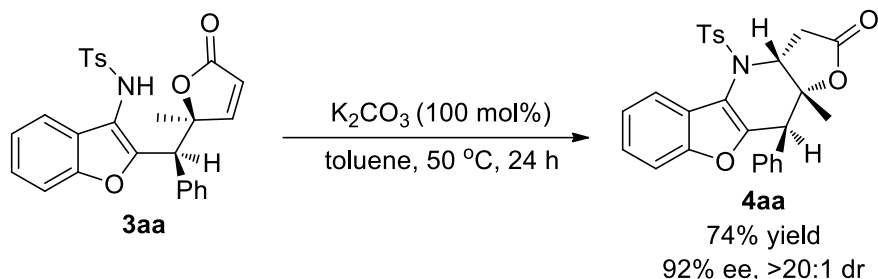

To a solution of **3aa** (23.7 mg, 0.05 mmol) in toluene (0.3 mL) was added  $\text{K}_2\text{CO}_3$  (6.9 mg, 0.05 mmol). The reaction mixture was stirred at 50 °C for 24 h. The solvent was evaporated to give the crude product, which was purified by silica gel chromatography to provide the desired product **4aa** as a white solid (17.4 mg, 74% yield, 92% ee, >20:1 dr).

### (3a*R*,10*R*,10a*R*)-10a-methyl-10-phenyl-4-tosyl-3a,4,10,10a-tetrahydrobenzofuro[3,2-*b*]furo[2,3-*e*]pyridin-2(3*H*)-one (**4aa**)

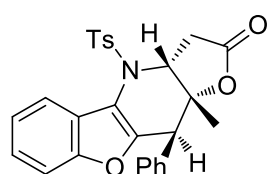

Eluent for flash column chromatography: petroleum ether/ethyl acetate = 12:1. White solid, 17.4 mg, 74% yield. mp 160.5-161.9 °C.  $^1\text{H}$  NMR ( $(\text{CD}_3)_2\text{SO}$ , 500 MHz):  $\delta$  (ppm) 8.12-8.10 (m, 1H), 7.66 (d,  $J = 5.0$  Hz, 2H), 7.52-7.50 (m, 1H), 7.44 (d,  $J = 5.0$  Hz, 2H), 7.36-7.34 (m, 2H), 7.27-7.24 (m, 1H), 7.17-7.14 (m, 2H), 6.72 (d,  $J = 10.0$  Hz, 2H), 4.93-4.90 (m, 1H), 4.68 (s, 1H), 3.17-3.12 (m, 1H), 2.95-2.90 (m, 1H), 2.39 (s, 3H), 0.72 (s, 3H).  $^{13}\text{C}$  NMR ( $(\text{CD}_3)_2\text{SO}$ , 125 MHz):  $\delta$  (ppm) 172.7, 154.2, 146.3, 145.5, 135.9, 134.3, 130.7, 129.4, 128.9, 128.2, 128.1, 125.6, 123.7, 123.2, 122.6, 116.5, 112.1, 85.3, 61.6, 48.1, 36.9, 24.2, 21.5. HRMS (ESI): exact mass calculated for  $[\text{M}+\text{H}]^+$  ( $\text{C}_{27}\text{H}_{24}\text{NO}_5\text{S}$ ) requires  $m/z$  474.1370, found  $m/z$  474.1373. The enantiomeric excess was determined to be 92% by HPLC. [IC column, 254 nm, *n*-hexane:EtOH = 60:40, 1.0 mL/min]: 11.1 min (minor), 8.3 min (major).  $[\alpha]_{\text{D}}^{22} = 116.00$  ( $c = 1.00$ ,  $\text{CH}_2\text{Cl}_2$ ).

**(3*aR*,10*R*,10*aR*)-10-methyl-10-phenyl-4-tosyl-3*a*,4,10,10*a*-tetrahydrobenzofuro[3,2-*b*]furo[2,3-*e*]pyridin-2(3*H*)-one (4*aa*)**

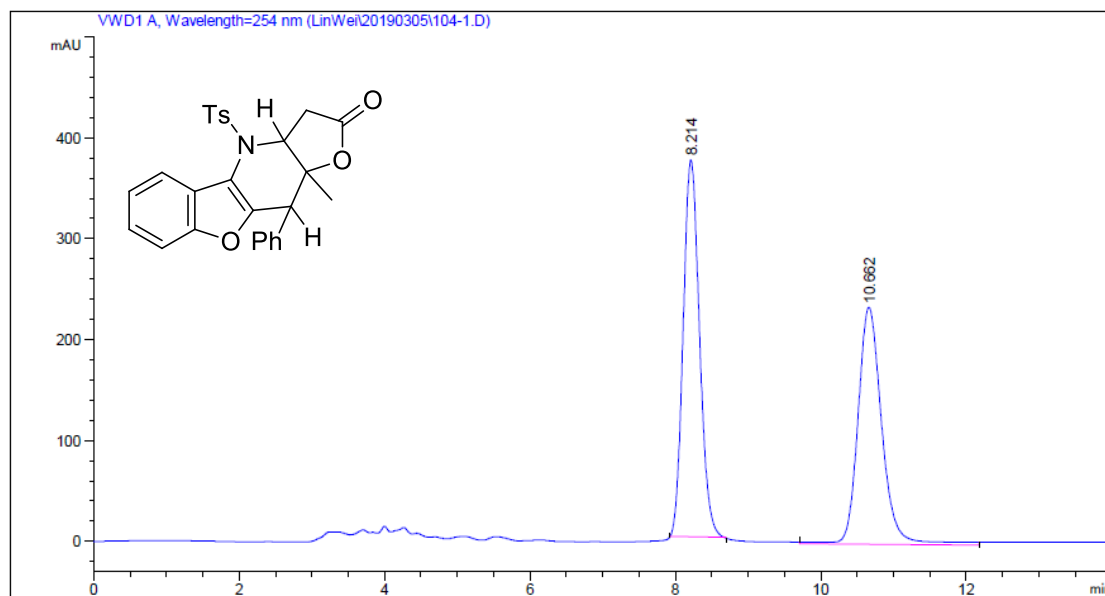

| # | Time   | Area   | Height | Width  | Symmetry | Area % |
|---|--------|--------|--------|--------|----------|--------|
| 1 | 8.214  | 5807.9 | 373.8  | 0.2589 | 0.863    | 51.814 |
| 2 | 10.662 | 5401.2 | 234.9  | 0.3832 | 0.801    | 48.186 |

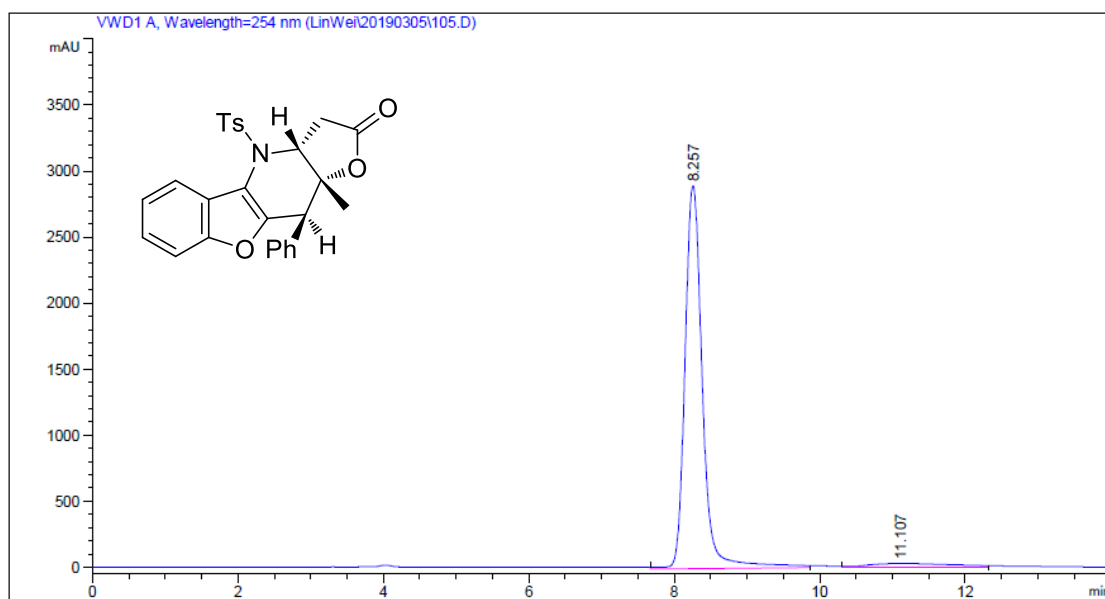

| # | Time   | Area    | Height | Width  | Symmetry | Area % |
|---|--------|---------|--------|--------|----------|--------|
| 1 | 8.257  | 48535.3 | 2900.5 | 0.2789 | 0.805    | 95.971 |
| 2 | 11.107 | 2037.7  | 26.1   | 1.3029 | 0.559    | 4.029  |



F: HPLC Analysis

**4-Methyl-*N*-(2-((*R*)-((*S*)-2-methyl-5-oxo-2,5-dihydrofuran-2-yl)(phenyl)methyl)benzenesulfonamide (3aa)**

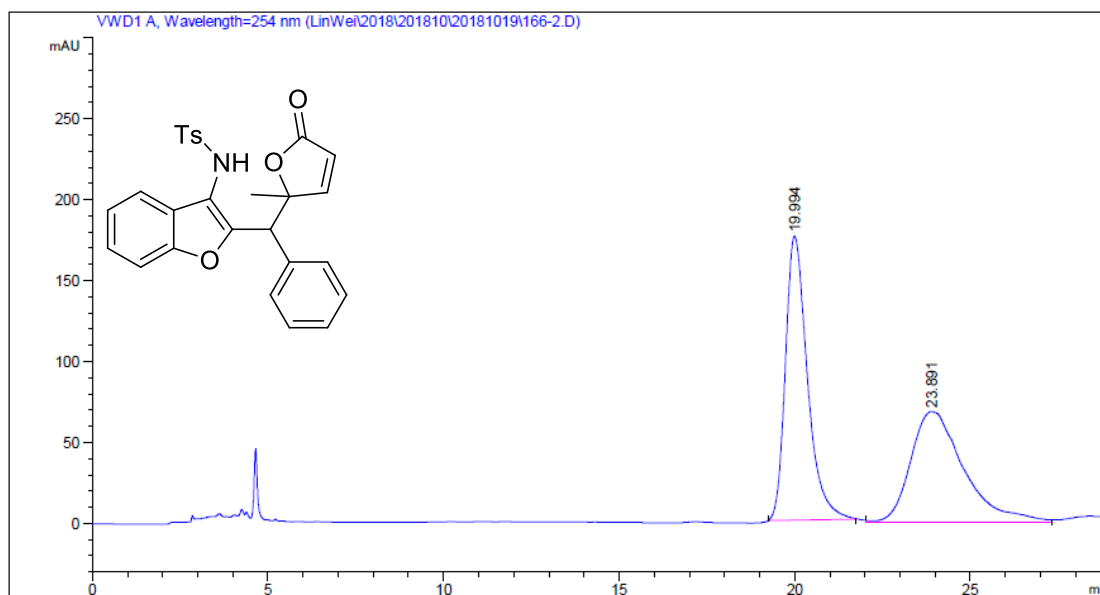

| # | Time   | Area   | Height | Width  | Symmetry | Area % |
|---|--------|--------|--------|--------|----------|--------|
| 1 | 19.994 | 7621.1 | 175.4  | 0.7243 | 0.677    | 51.447 |
| 2 | 23.891 | 7192.6 | 68.4   | 1.7524 | 0.625    | 48.553 |

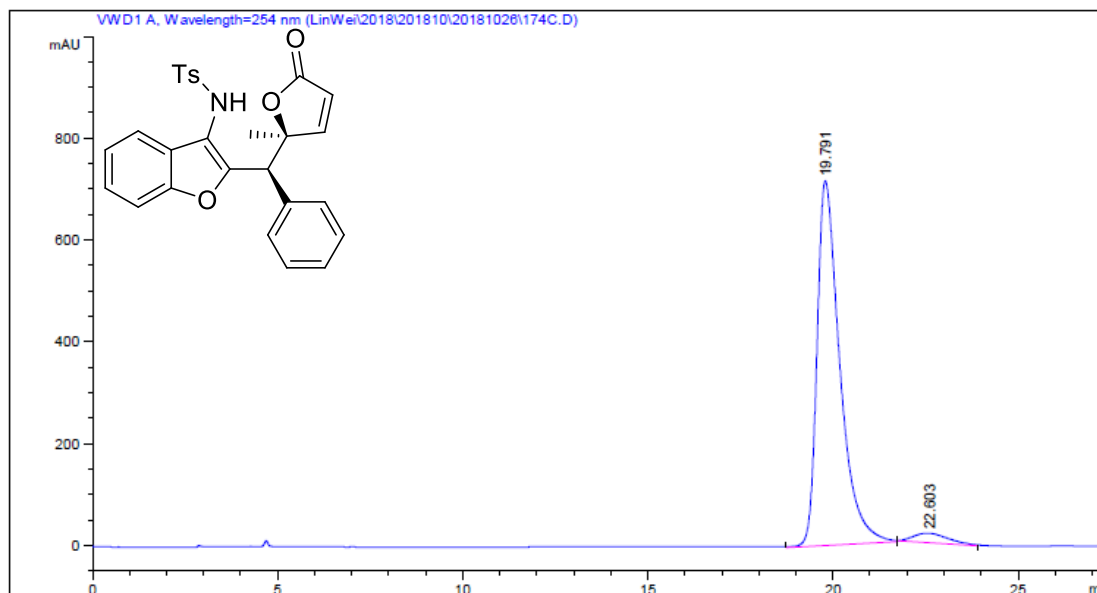

| # | Time   | Area    | Height | Width  | Symmetry | Area % |
|---|--------|---------|--------|--------|----------|--------|
| 1 | 19.791 | 30636.9 | 716.5  | 0.7127 | 0.549    | 96.052 |
| 2 | 22.603 | 1259.3  | 18.9   | 1.1126 | 0.595    | 3.948  |



***N*-2-((*R*)-(4-fluorophenyl)((*S*)-2-methyl-5-oxo-2,5-dihydrofuran-2-yl)methyl)benzofuran-3-yl)-4-methylbenzenesulfonamide (3ba)**

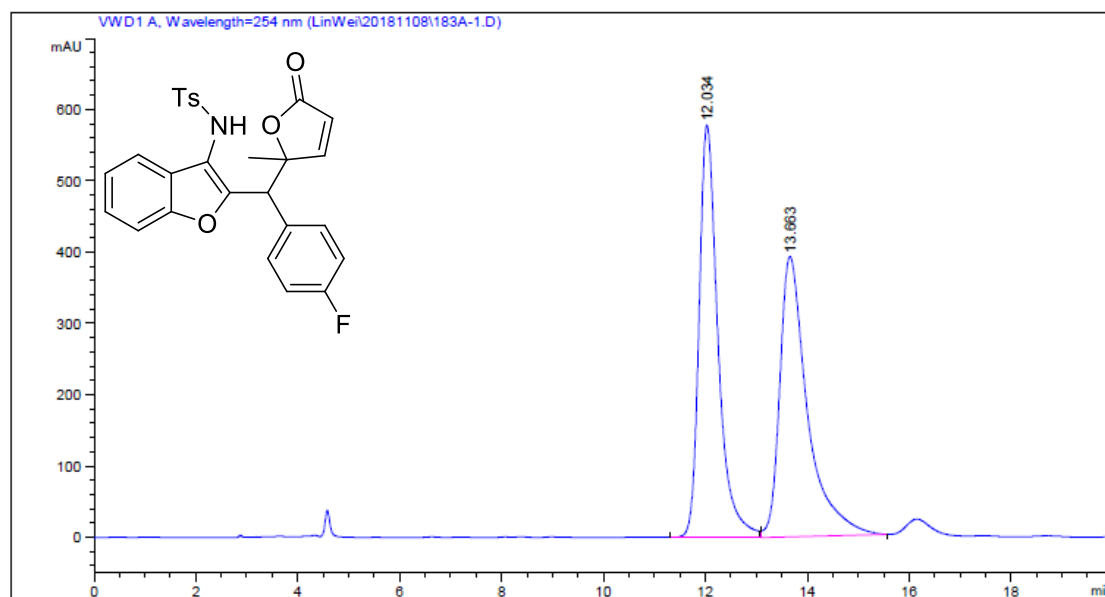

| # | Time   | Area    | Height | Width  | Symmetry | Area % |
|---|--------|---------|--------|--------|----------|--------|
| 1 | 12.034 | 14852   | 578.2  | 0.3877 | 0.661    | 50.022 |
| 2 | 13.663 | 14838.8 | 393.1  | 0.6291 | 0.556    | 49.978 |

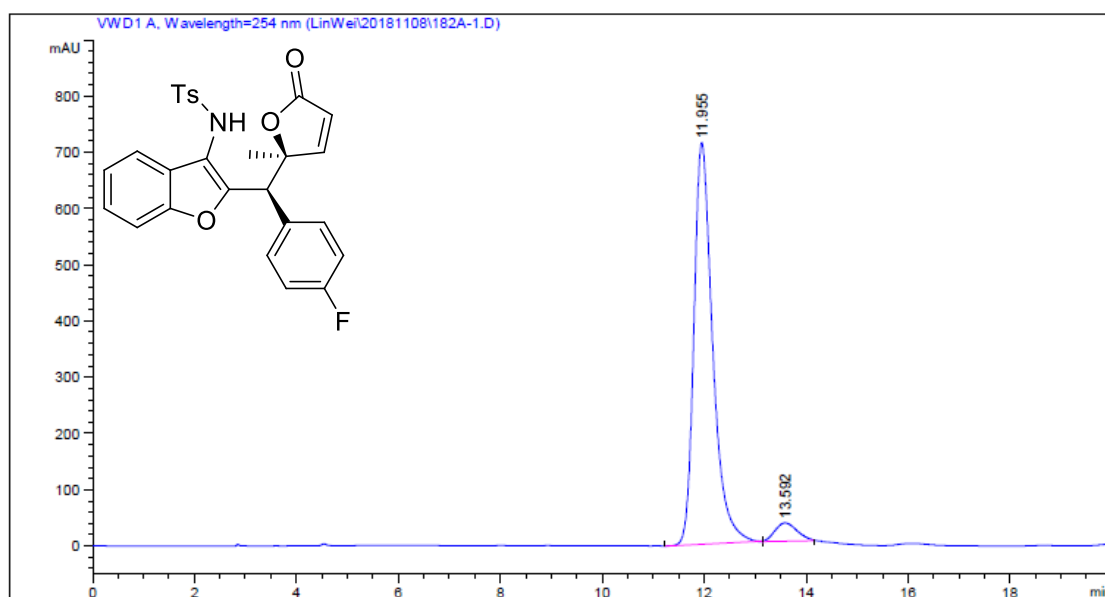

| # | Time   | Area    | Height | Width  | Symmetry | Area % |
|---|--------|---------|--------|--------|----------|--------|
| 1 | 11.955 | 18206.4 | 714    | 0.425  | 0.688    | 94.822 |
| 2 | 13.592 | 994.2   | 32.7   | 0.5064 | 0.826    | 5.178  |

***N*-2-((*R*)-(4-chlorophenyl)((*S*)-2-methyl-5-oxo-2,5-dihydrofuran-2-yl)methyl)benzofuran-3-yl)-4-methylbenzenesulfonamide (3ca)**

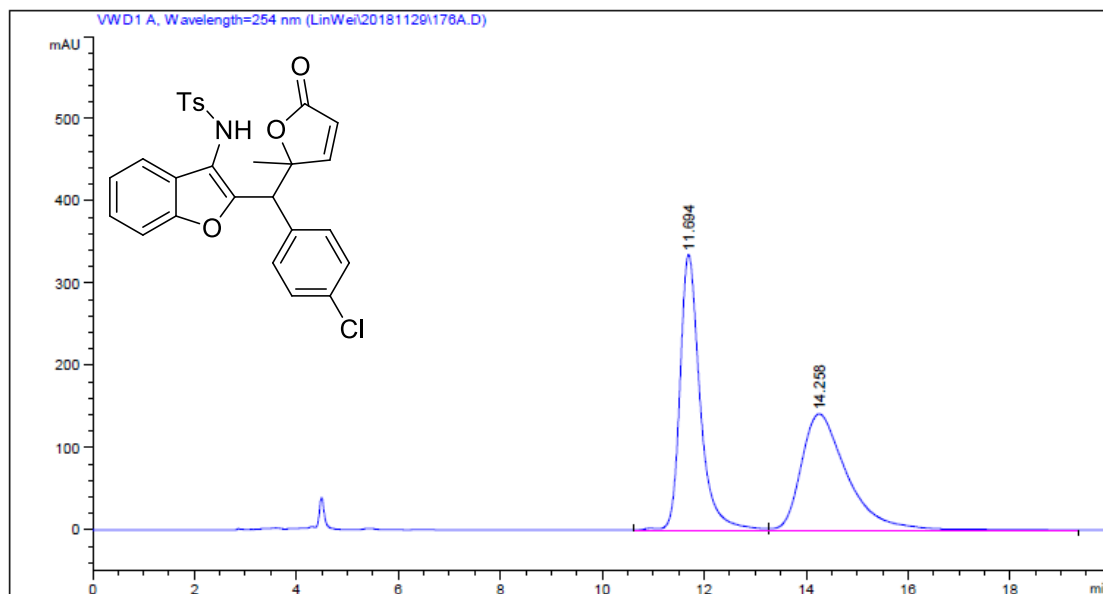

| # | Time   | Area   | Height | Width  | Symmetry | Area % |
|---|--------|--------|--------|--------|----------|--------|
| 1 | 11.694 | 9150.4 | 335.1  | 0.4104 | 0.688    | 51.012 |
| 2 | 14.258 | 8787.4 | 141.1  | 0.9178 | 0.599    | 48.988 |

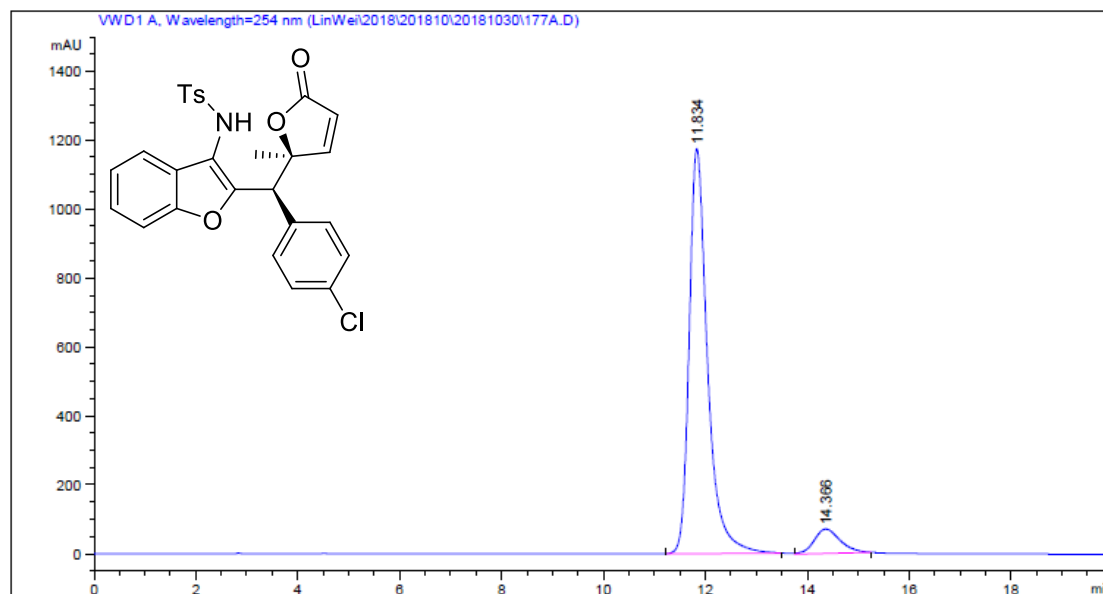

| # | Time   | Area   | Height | Width  | Symmetry | Area % |
|---|--------|--------|--------|--------|----------|--------|
| 1 | 11.834 | 29334  | 1174.8 | 0.4162 | 0.681    | 91.998 |
| 2 | 14.366 | 2551.6 | 71.2   | 0.5972 | 0.79     | 8.002  |

***N*-2-((*R*)-(4-bromophenyl)((*S*)-2-methyl-5-oxo-2,5-dihydrofuran-2-yl)methyl)benzofuran-3-yl)-4-methylbenzenesulfonamide (3da)**

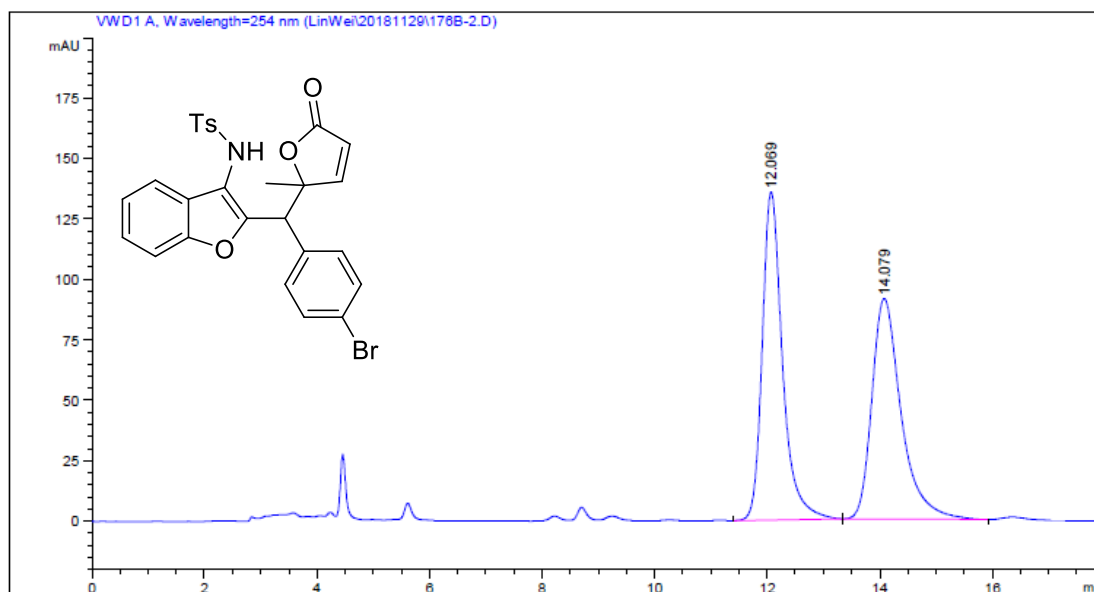

| # | Time   | Area   | Height | Width  | Symmetry | Area % |
|---|--------|--------|--------|--------|----------|--------|
| 1 | 12.069 | 3381.8 | 135.6  | 0.3759 | 0.723    | 50.731 |
| 2 | 14.079 | 3284.4 | 91.1   | 0.5428 | 0.672    | 49.269 |

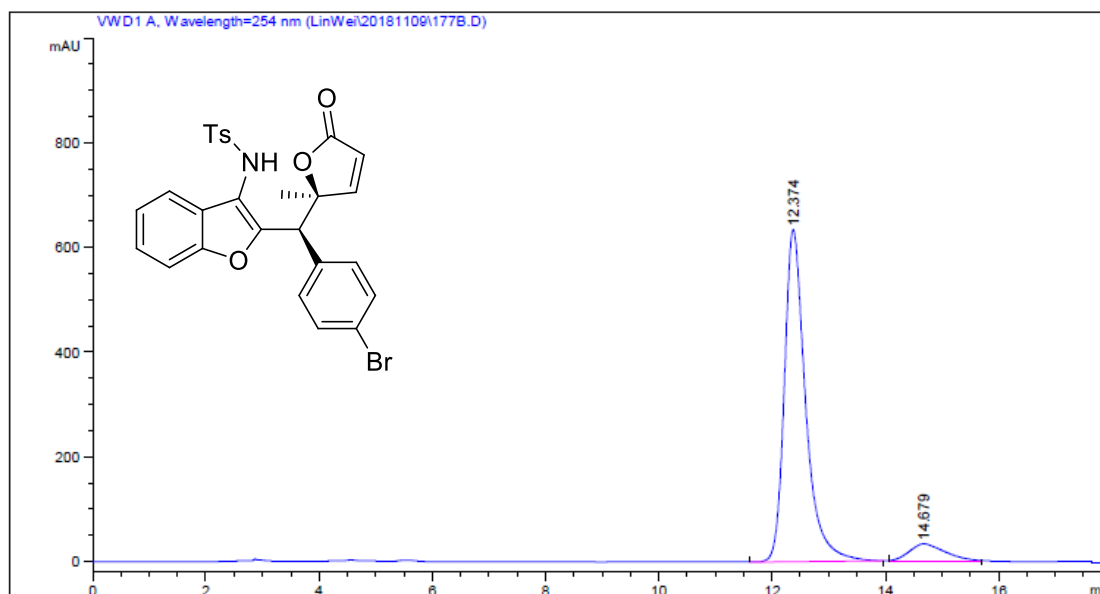

| # | Time   | Area    | Height | Width  | Symmetry | Area % |
|---|--------|---------|--------|--------|----------|--------|
| 1 | 12.374 | 16555.3 | 633.9  | 0.4353 | 0.682    | 92.185 |
| 2 | 14.679 | 1403.6  | 32.5   | 0.7201 | 0.672    | 7.815  |

**4-Methyl-N-(2-((R)-(S)-2-methyl-5-oxo-2,5-dihydrofuran-2-yl)(p-tolyl)methyl)benzofuran-3-yl)benzenesulfonamide (3ea)**

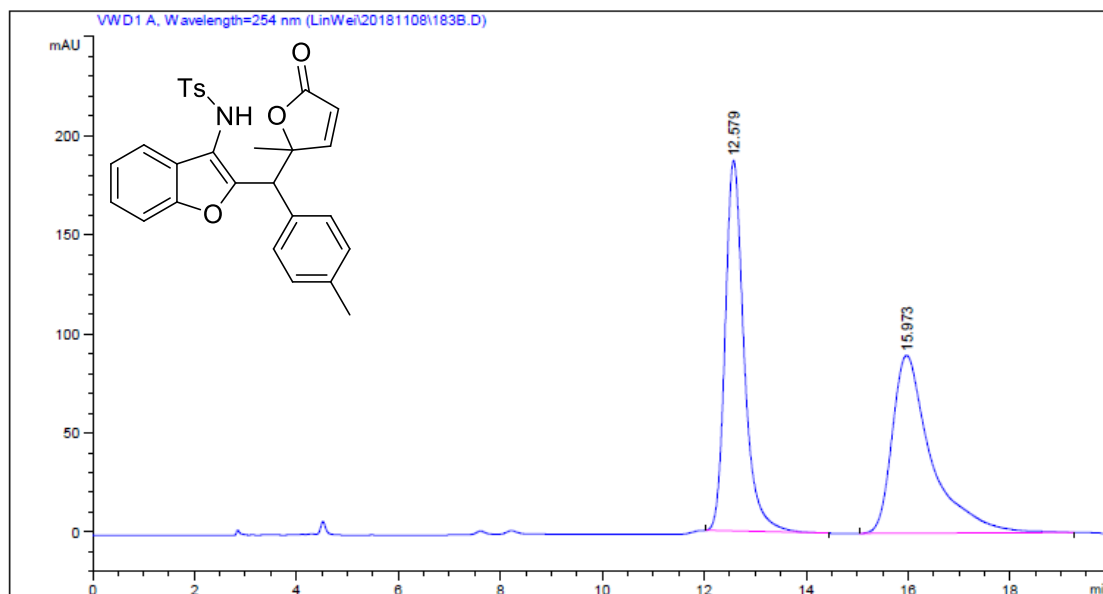

| # | Time   | Area   | Height | Width  | Symmetry | Area % |
|---|--------|--------|--------|--------|----------|--------|
| 1 | 12.579 | 4808.1 | 187.2  | 0.4282 | 0.766    | 50.189 |
| 2 | 15.973 | 4771.8 | 89.8   | 0.7721 | 0.531    | 49.811 |

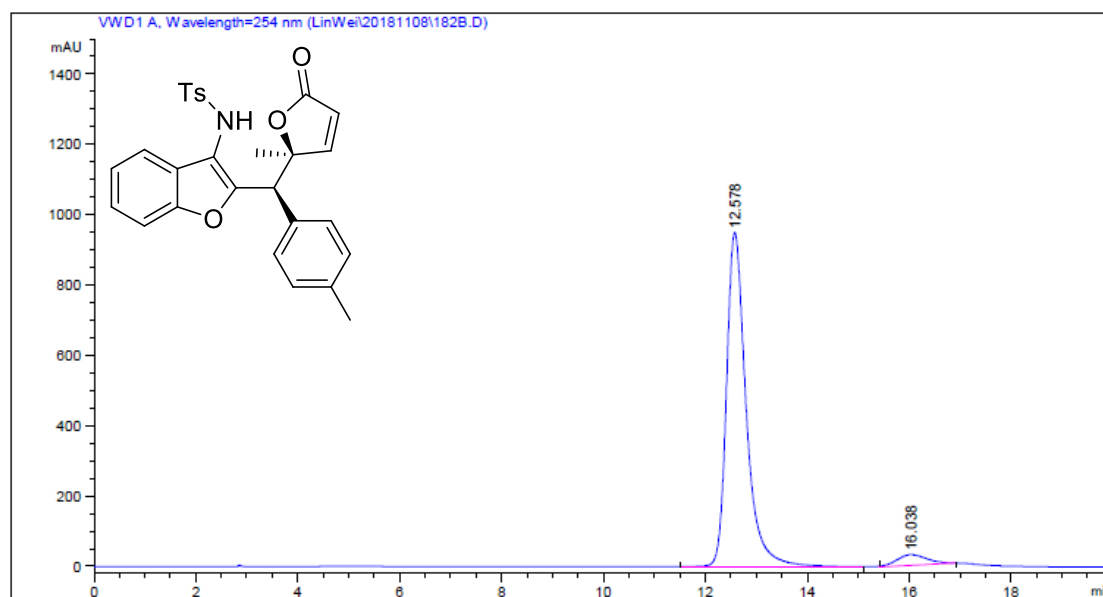

| # | Time   | Area    | Height | Width  | Symmetry | Area % |
|---|--------|---------|--------|--------|----------|--------|
| 1 | 12.578 | 25450.6 | 951    | 0.4042 | 0.661    | 95.321 |
| 2 | 16.038 | 1249.3  | 30.4   | 0.6842 | 0.889    | 4.679  |

***N*-2-((*R*)-(4-methoxyphenyl)((*S*)-2-methyl-5-oxo-2,5-dihydrofuran-2-yl)methyl)benzofuran-3-yl)-4-methylbenzenesulfonamide (3fa)**

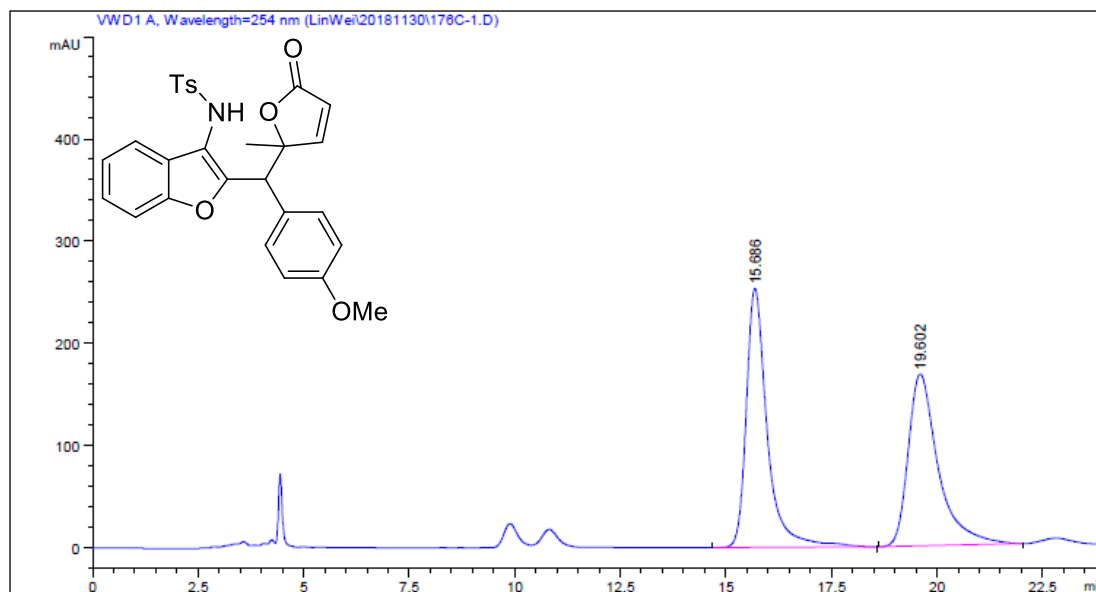

| # | Time   | Area   | Height | Width  | Symmetry | Area % |
|---|--------|--------|--------|--------|----------|--------|
| 1 | 15.686 | 8755.6 | 253.2  | 0.5144 | 0.623    | 51.270 |
| 2 | 19.602 | 8321.7 | 168.1  | 0.7417 | 0.609    | 48.730 |

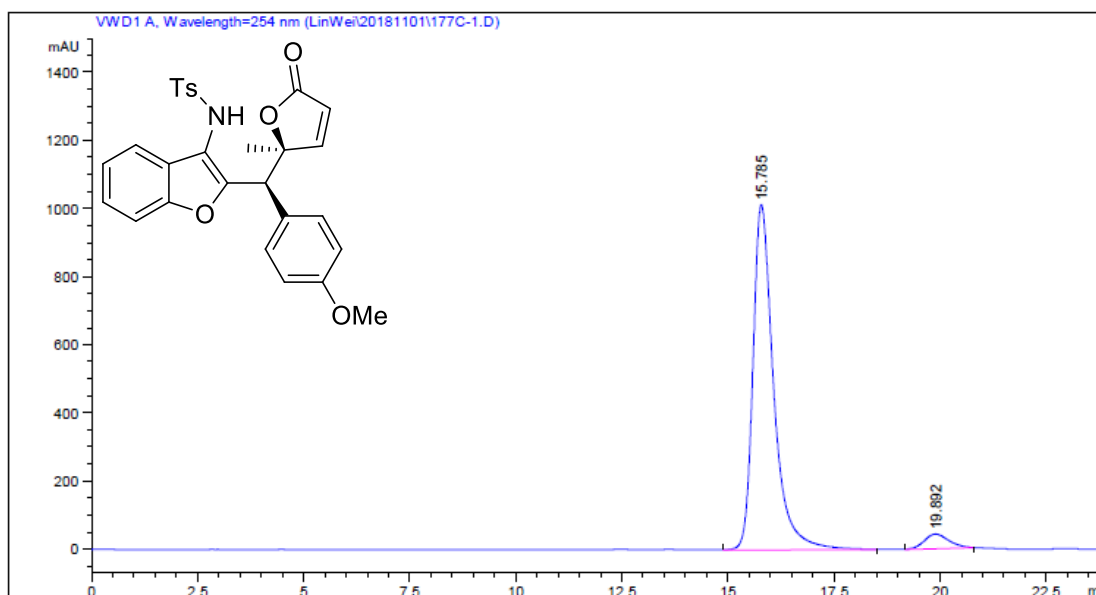

| # | Time   | Area    | Height | Width  | Symmetry | Area % |
|---|--------|---------|--------|--------|----------|--------|
| 1 | 15.785 | 34464.7 | 1014   | 0.5665 | 0        | 95.184 |
| 2 | 19.892 | 1743.8  | 42.8   | 0.6797 | 0.827    | 4.816  |

***N*-2-((*R*)-(3-fluorophenyl)((*S*)-2-methyl-5-oxo-2,5-dihydrofuran-2-yl)methyl)benzofuran-3-yl)-4-methylbenzenesulfonamide (3ga)**

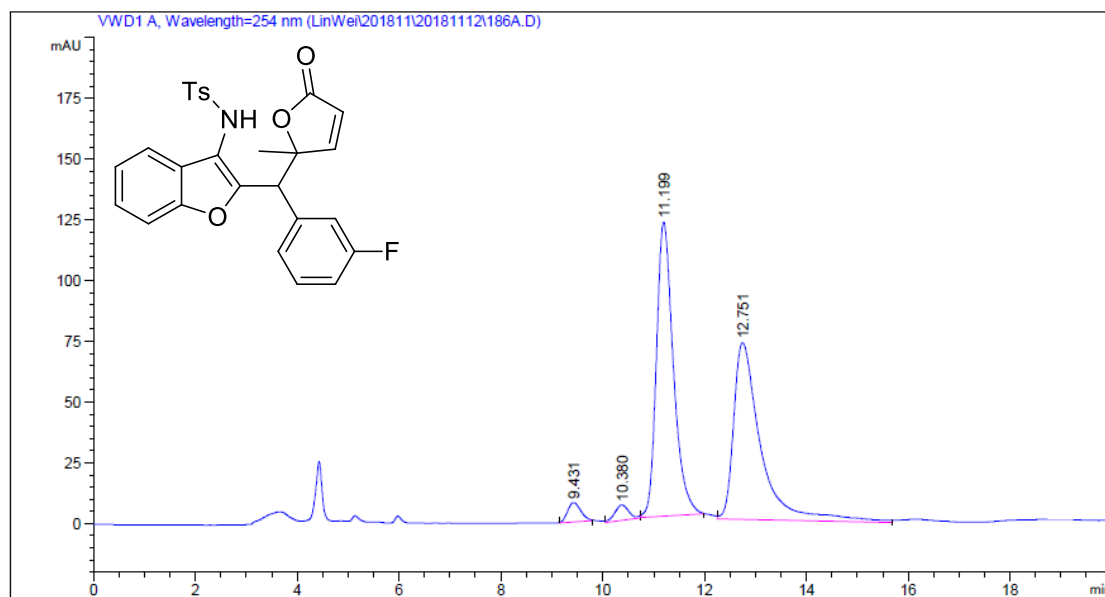

| # | Time   | Area   | Height | Width  | Symmetry | Area % |
|---|--------|--------|--------|--------|----------|--------|
| 1 | 9.431  | 147.5  | 8.1    | 0.3053 | 0.825    | 2.561  |
| 2 | 10.38  | 125.2  | 6.4    | 0.3254 | 1.036    | 2.173  |
| 3 | 11.199 | 2796.9 | 121.1  | 0.3849 | 0.722    | 48.555 |
| 4 | 12.751 | 2690.6 | 72.6   | 0.6173 | 0.475    | 46.710 |

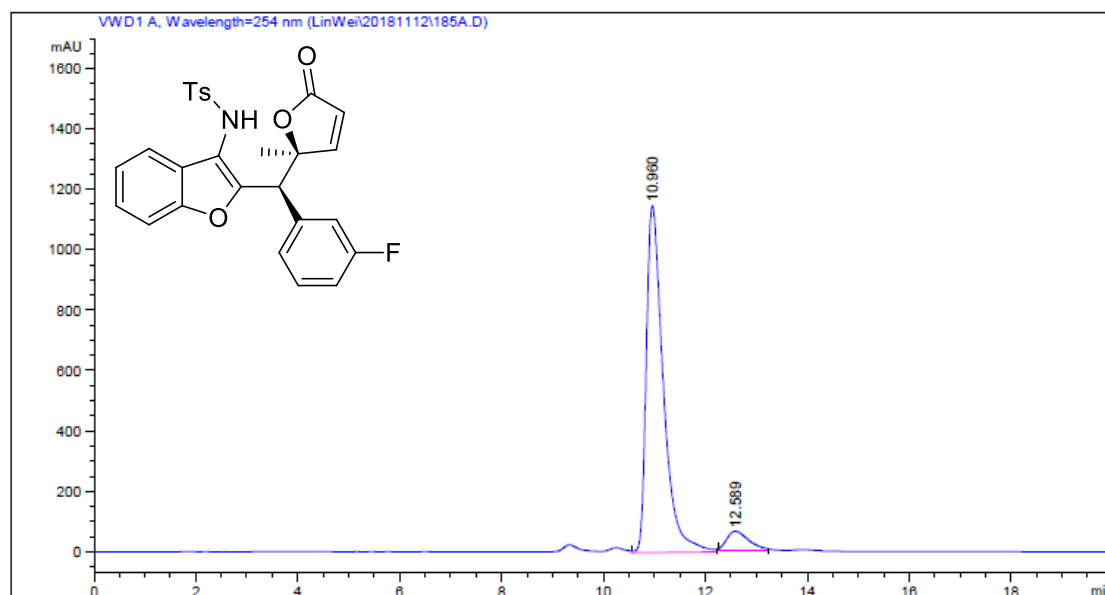

| # | Time   | Area    | Height | Width  | Symmetry | Area % |
|---|--------|---------|--------|--------|----------|--------|
| 1 | 10.96  | 26618.3 | 1148.2 | 0.3864 | 0.529    | 93.625 |
| 2 | 12.589 | 1812.5  | 61.9   | 0.4881 | 0.632    | 6.375  |

***N*-2-((*R*)-(3-chlorophenyl)((*S*)-2-methyl-5-oxo-2,5-dihydrofuran-2-yl)methyl)benzofuran-3-yl)-4-methylbenzenesulfonamide (3ha)**

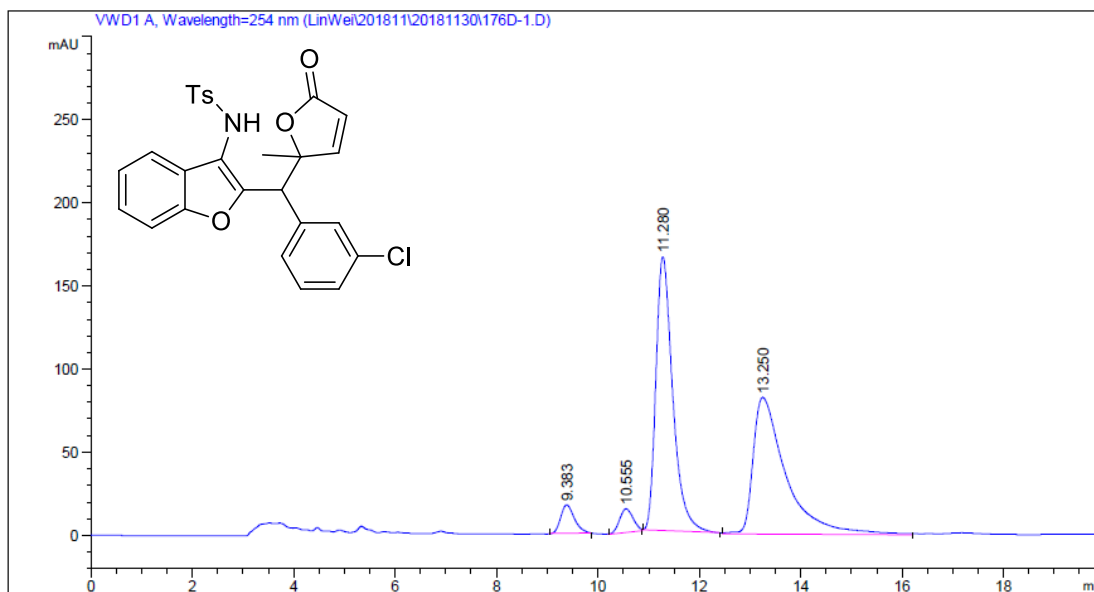

| # | Time   | Area   | Height | Width  | Symmetry | Area % |
|---|--------|--------|--------|--------|----------|--------|
| 1 | 9.383  | 319.7  | 17.1   | 0.3115 | 0.755    | 3.947  |
| 2 | 10.555 | 261.5  | 14.1   | 0.3089 | 0.915    | 3.228  |
| 3 | 11.28  | 3791.8 | 164.7  | 0.3836 | 0.675    | 46.804 |
| 4 | 13.25  | 3728.4 | 82.3   | 0.755  | 0.4      | 46.021 |

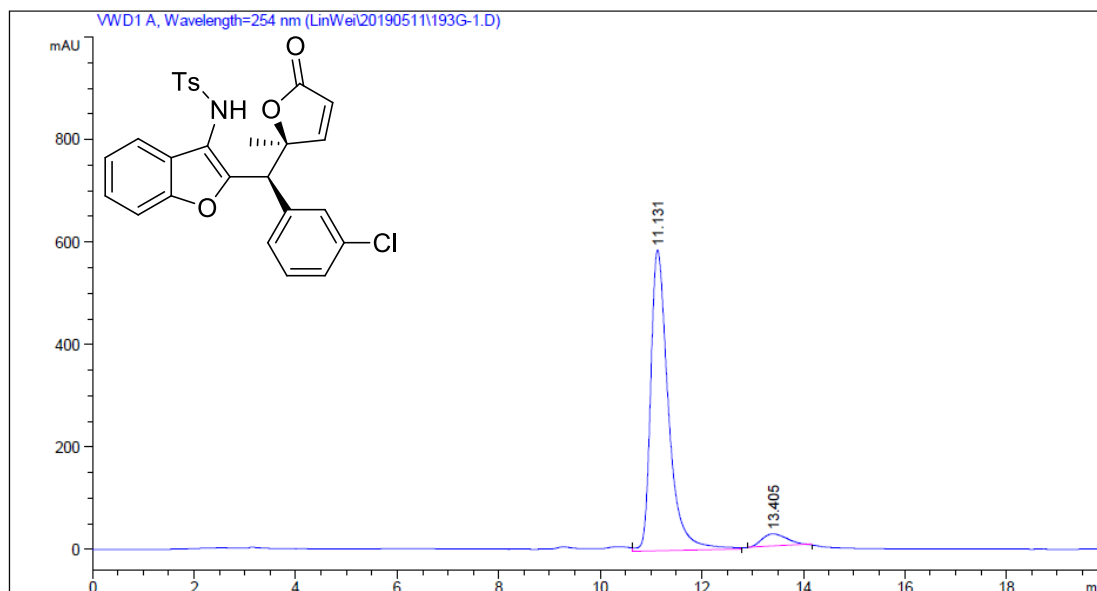

| # | Time   | Area    | Height | Width  | Symmetry | Area % |
|---|--------|---------|--------|--------|----------|--------|
| 1 | 11.131 | 14212.1 | 587    | 0.4035 | 0.609    | 94.830 |
| 2 | 13.405 | 774.8   | 23.4   | 0.5522 | 0.797    | 5.170  |

***N*-2-((*R*)-(3-bromophenyl)((*S*)-2-methyl-5-oxo-2,5-dihydrofuran-2-yl)methyl)benzofuran-3-yl)-4-methylbenzenesulfonamide (3ia)**

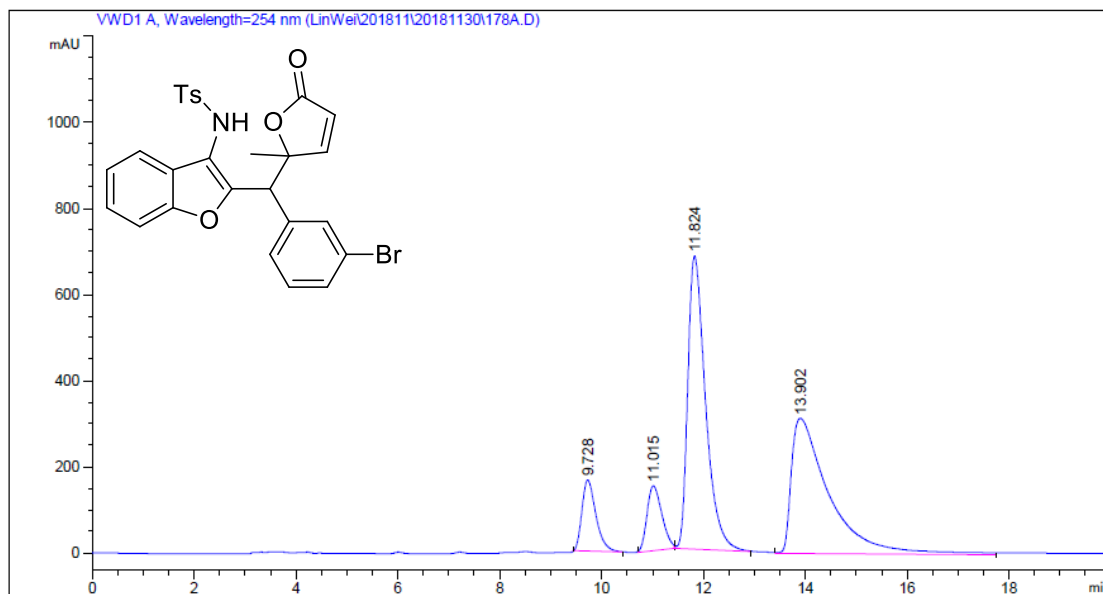

| # | Time   | Area    | Height | Width  | Symmetry | Area % |
|---|--------|---------|--------|--------|----------|--------|
| 1 | 9.728  | 3152.8  | 165.1  | 0.3182 | 0.685    | 8.120  |
| 2 | 11.015 | 3049.8  | 150.9  | 0.3369 | 0.723    | 7.854  |
| 3 | 11.824 | 16474.8 | 680.8  | 0.4033 | 0.589    | 42.428 |
| 4 | 13.902 | 16152.5 | 313.7  | 0.8582 | 0.298    | 41.598 |

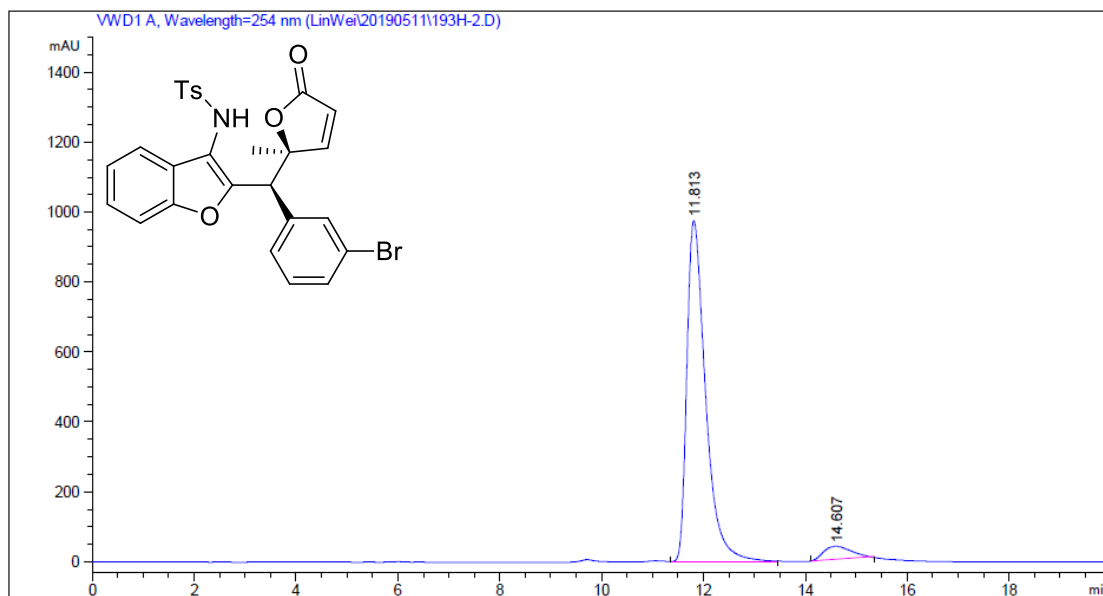

| # | Time   | Area    | Height | Width  | Symmetry | Area % |
|---|--------|---------|--------|--------|----------|--------|
| 1 | 11.813 | 24939.7 | 975.9  | 0.4259 | 0.566    | 94.927 |
| 2 | 14.607 | 1332.8  | 36.6   | 0.6068 | 0.873    | 5.073  |



**4-Methyl-N-(2-((R)-(S)-2-methyl-5-oxo-2,5-dihydrofuran-2-yl)(m-tolyl)methyl)benzofuran-3-yl)benzenesulfonamide (3ja)**

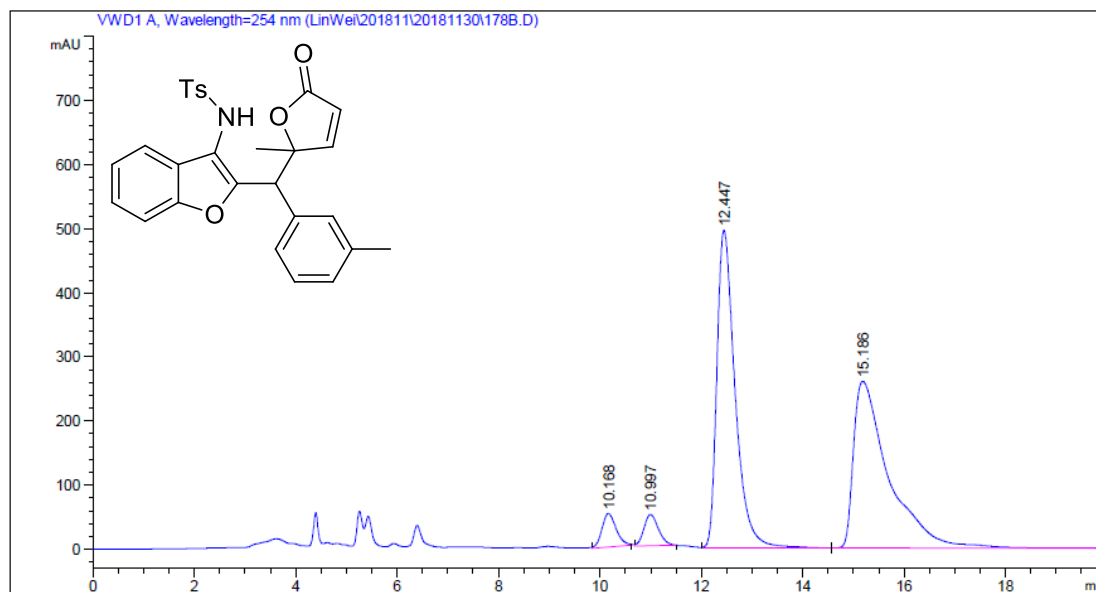

| # | Time   | Area    | Height | Width  | Symmetry | Area % |
|---|--------|---------|--------|--------|----------|--------|
| 1 | 10.168 | 1018.2  | 52.3   | 0.3242 | 0.819    | 3.764  |
| 2 | 10.997 | 971.9   | 48.8   | 0.3319 | 0.81     | 3.592  |
| 3 | 12.447 | 12412.2 | 495.9  | 0.377  | 0.582    | 45.881 |
| 4 | 15.186 | 12651.1 | 260.3  | 0.7191 | 0.314    | 46.764 |

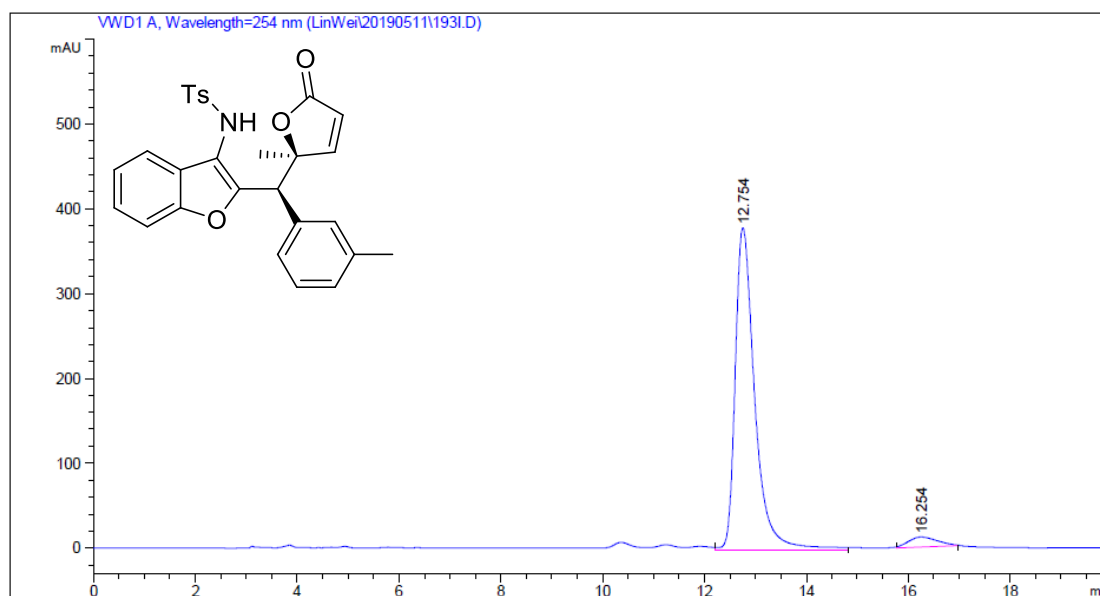

| # | Time   | Area    | Height | Width  | Symmetry | Area % |
|---|--------|---------|--------|--------|----------|--------|
| 1 | 12.754 | 10168.6 | 380    | 0.446  | 0.606    | 95.619 |
| 2 | 16.254 | 465.9   | 11.7   | 0.6615 | 0.767    | 4.381  |

***N*-2-((*R*)-(3-methoxyphenyl)((*S*)-2-methyl-5-oxo-2,5-dihydrofuran-2-yl)methyl)benzofuran-3-yl)-4-methylbenzenesulfonamide (3ka)**

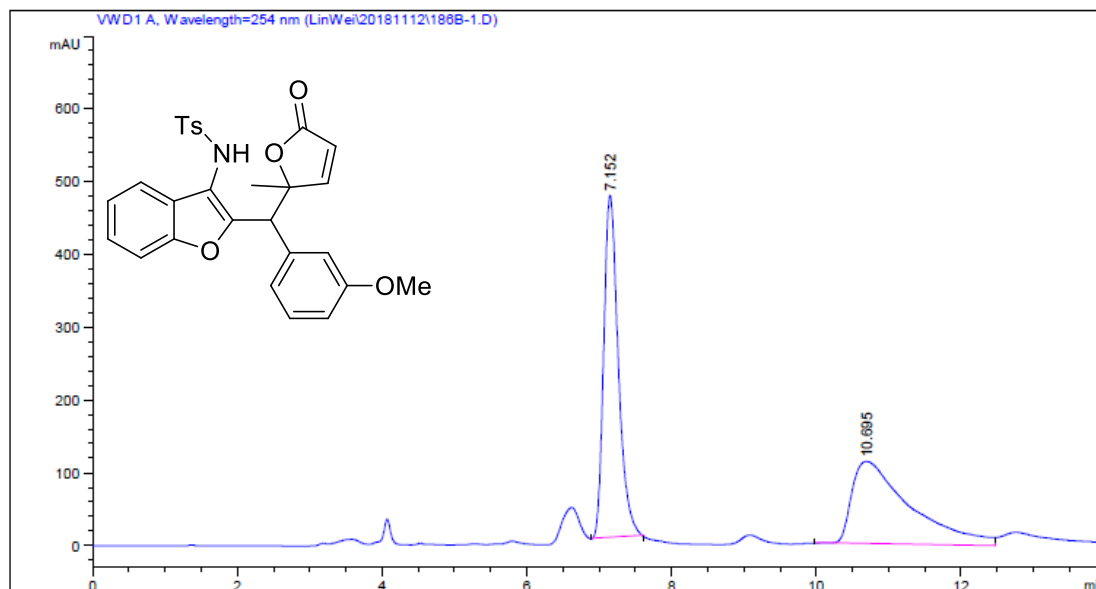

| # | Time   | Area   | Height | Width  | Symmetry | Area % |
|---|--------|--------|--------|--------|----------|--------|
| 1 | 7.152  | 6522.4 | 469.9  | 0.2313 | 0.733    | 50.881 |
| 2 | 10.695 | 6296.5 | 112.8  | 0.9304 | 0.322    | 49.119 |

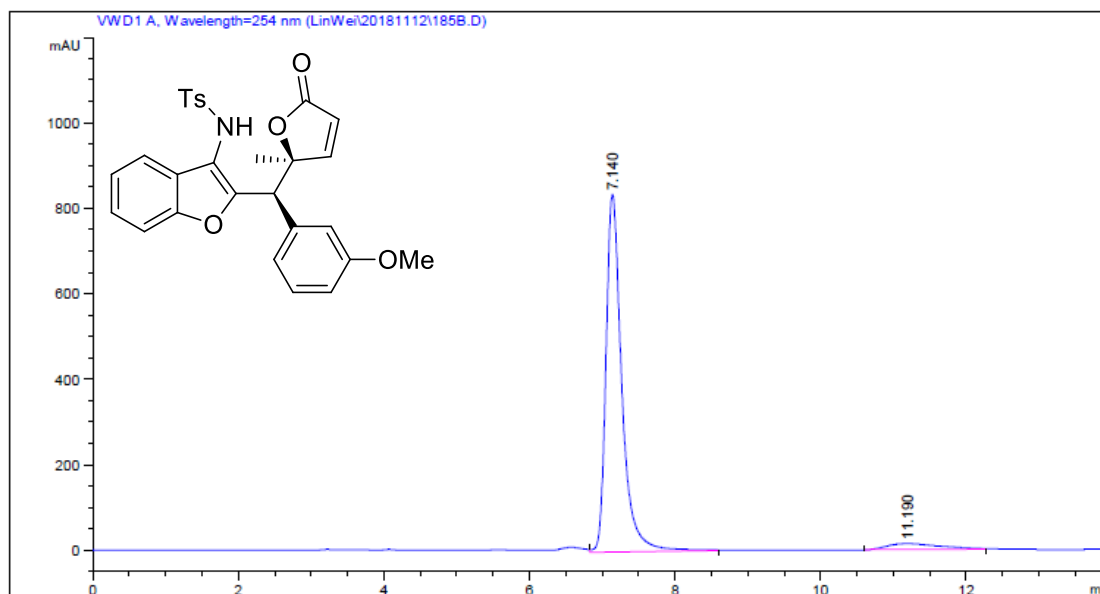

| # | Time  | Area    | Height | Width  | Symmetry | Area % |
|---|-------|---------|--------|--------|----------|--------|
| 1 | 7.14  | 12655.7 | 837.1  | 0.252  | 0.657    | 94.945 |
| 2 | 11.19 | 673.9   | 13.2   | 0.8526 | 0.557    | 5.055  |

**4-Methyl-N-(2-((R)-((S)-2-methyl-5-oxo-2,5-dihydrofuran-2-yl)(o-tolyl)methyl)benzenesulfonamide (3la)**

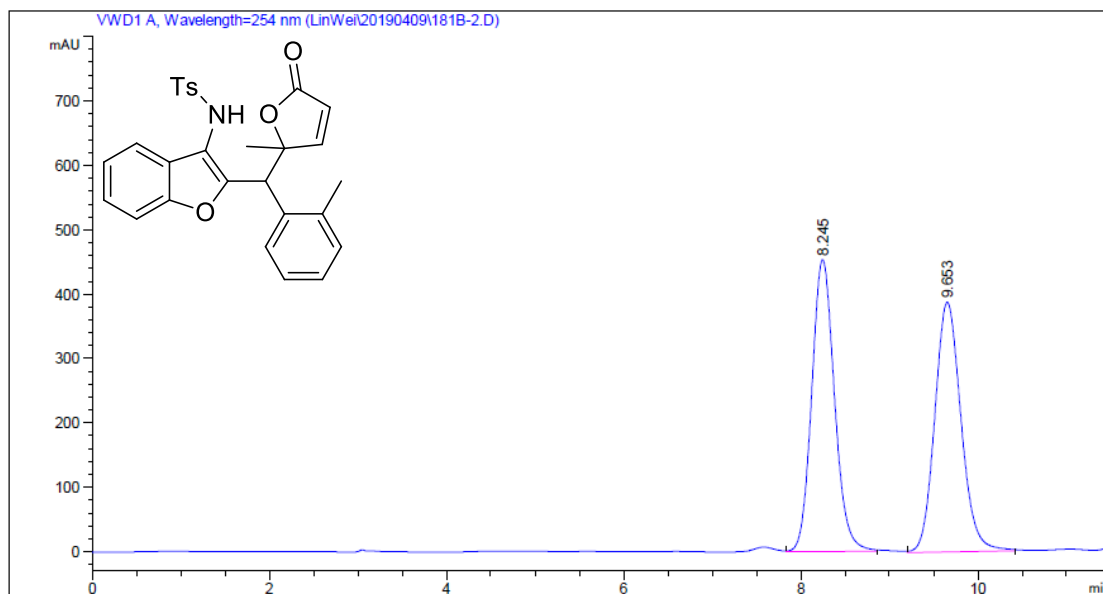

| # | Time  | Area   | Height | Width  | Symmetry | Area % |
|---|-------|--------|--------|--------|----------|--------|
| 1 | 8.245 | 8102.8 | 453.9  | 0.2975 | 0.873    | 50.381 |
| 2 | 9.653 | 7980.4 | 387.9  | 0.3429 | 0.869    | 49.619 |

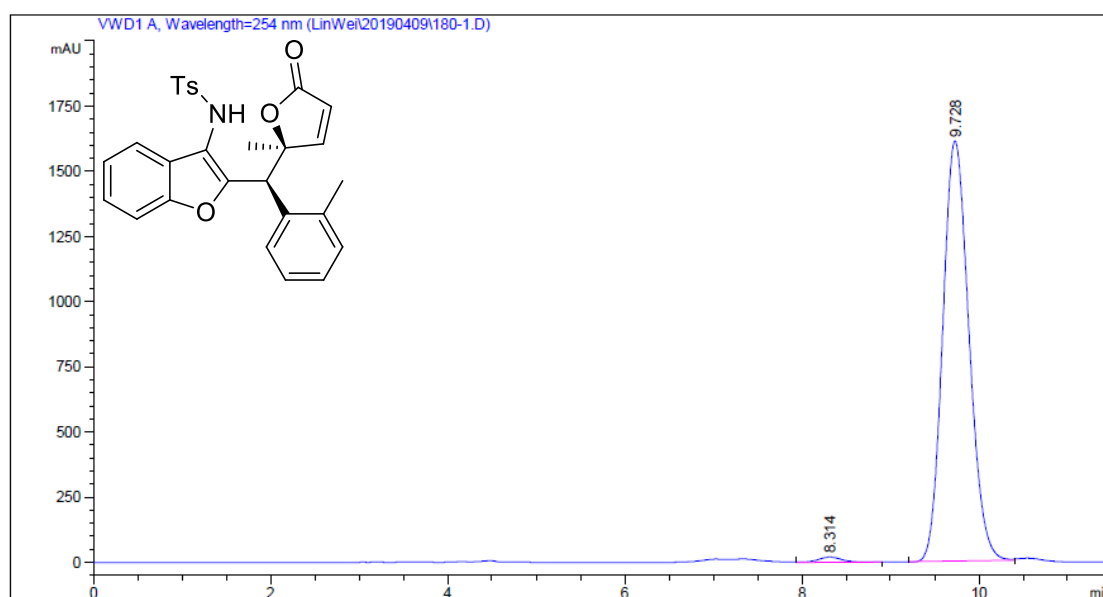

| # | Time  | Area    | Height | Width  | Symmetry | Area % |
|---|-------|---------|--------|--------|----------|--------|
| 1 | 8.314 | 367.7   | 20     | 0.2836 | 0.904    | 1.099  |
| 2 | 9.728 | 33098.9 | 1612   | 0.3422 | 0.841    | 98.901 |

**4-Methyl-N-(2-((R)-(S)-2-methyl-5-oxo-2,5-dihydrofuran-2-yl)(thiophen-2-yl)methyl)benzofuran-3-yl)benzenesulfonamide (3ma)**

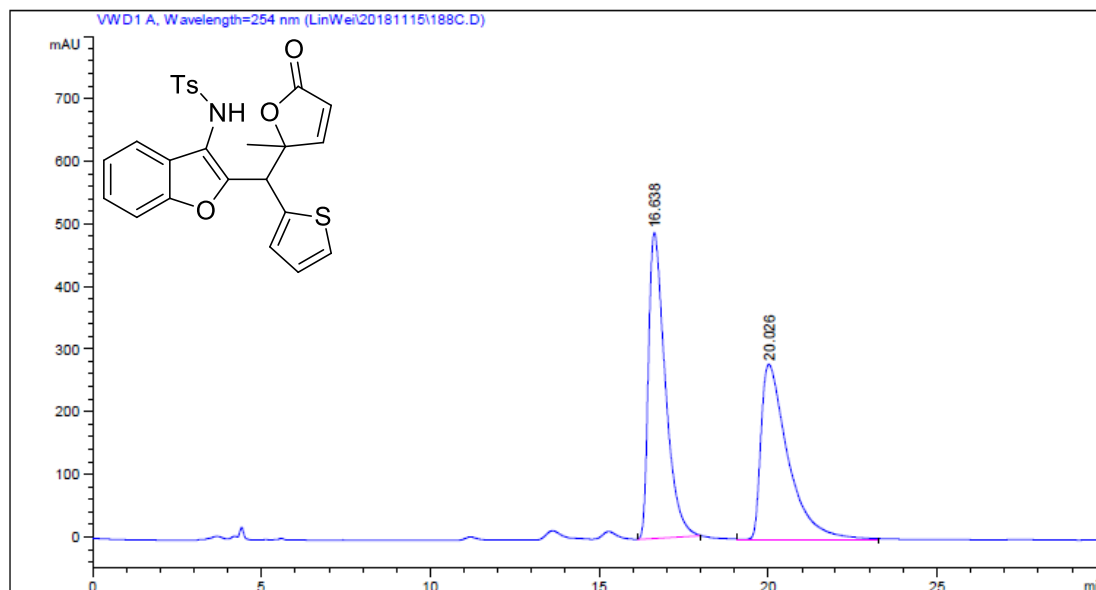

| # | Time   | Area    | Height | Width  | Symmetry | Area % |
|---|--------|---------|--------|--------|----------|--------|
| 1 | 16.638 | 16872.6 | 488.7  | 0.5755 | 0.524    | 51.542 |
| 2 | 20.026 | 15862.9 | 280.9  | 0.9414 | 0.394    | 48.458 |

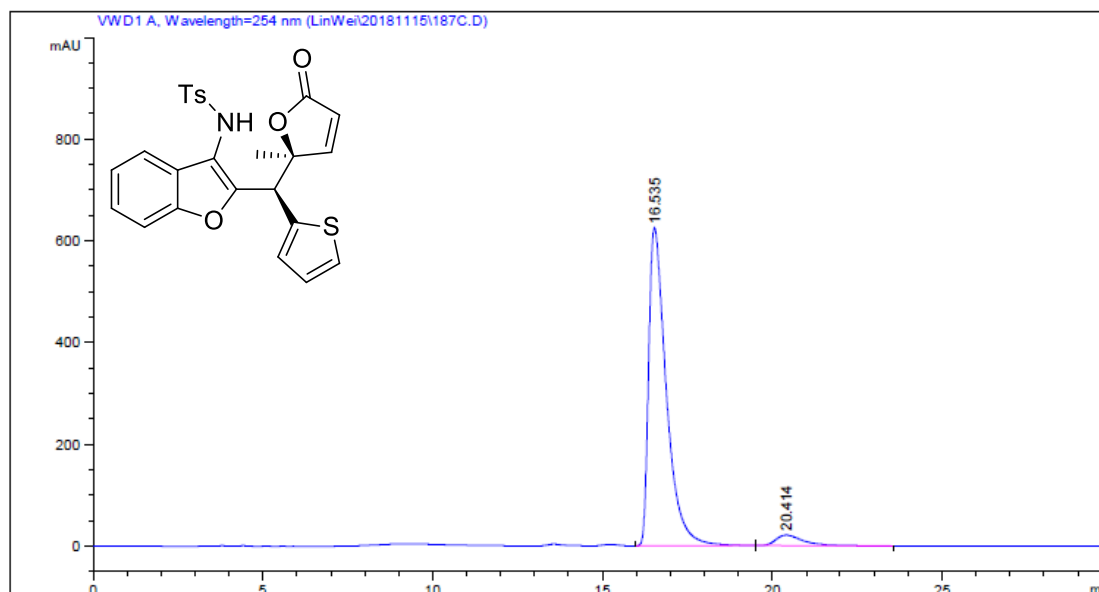

| # | Time   | Area    | Height | Width  | Symmetry | Area % |
|---|--------|---------|--------|--------|----------|--------|
| 1 | 16.535 | 22540.7 | 625.1  | 0.5447 | 0.45     | 95.133 |
| 2 | 20.414 | 1153.2  | 20.8   | 0.793  | 0.568    | 4.867  |

***N*-2-((*R*)-((*S*)-2-methyl-5-oxo-2,5-dihydrofuran-2-yl)(phenyl)methyl)benzofuran-3-yl)benzenesulfonamide (3na)**

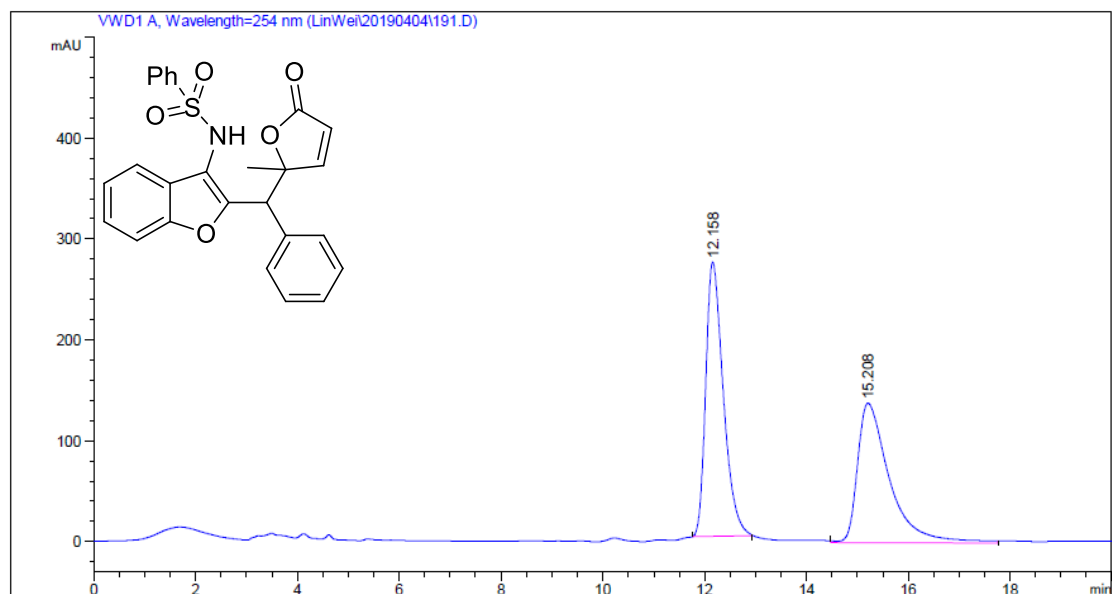

| # | Time   | Area   | Height | Width  | Symmetry | Area % |
|---|--------|--------|--------|--------|----------|--------|
| 1 | 12.158 | 6518.7 | 272.1  | 0.3993 | 0.637    | 51.649 |
| 2 | 15.208 | 6102.5 | 138.7  | 0.7334 | 0.465    | 48.351 |

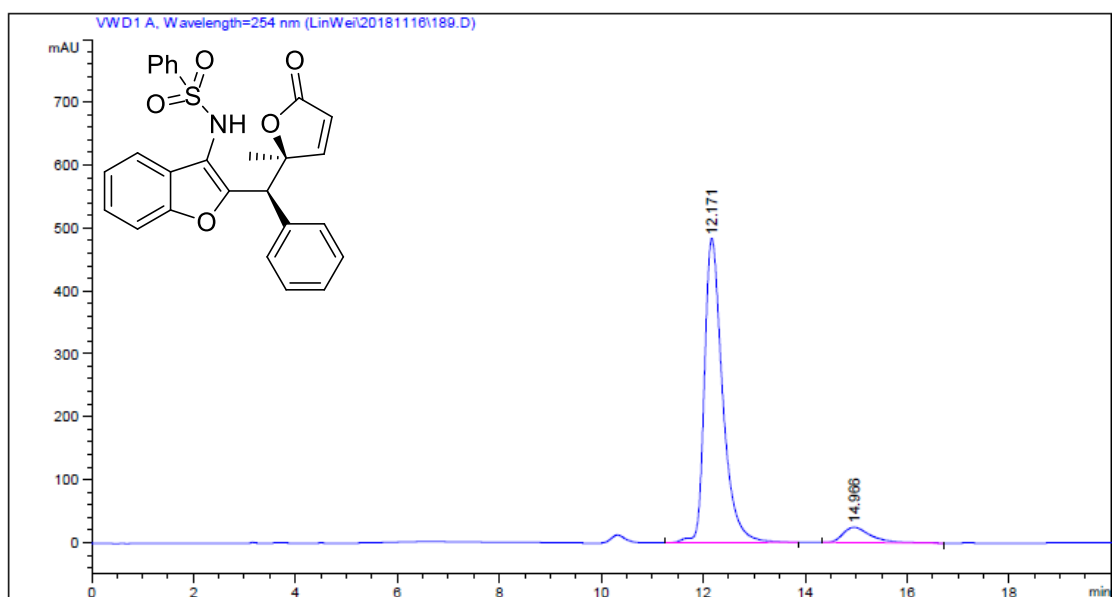

| # | Time   | Area    | Height | Width  | Symmetry | Area % |
|---|--------|---------|--------|--------|----------|--------|
| 1 | 12.171 | 11998.4 | 483.8  | 0.3743 | 0.635    | 92.795 |
| 2 | 14.966 | 931.6   | 24.4   | 0.5677 | 0.624    | 7.205  |

***N*-2-((*R*)-((*S*)-2-ethyl-5-oxo-2,5-dihydrofuran-2-yl)(phenyl)methyl)benzofuran-3-yl)-4-methylbenzenesulfonamide (3ab)**

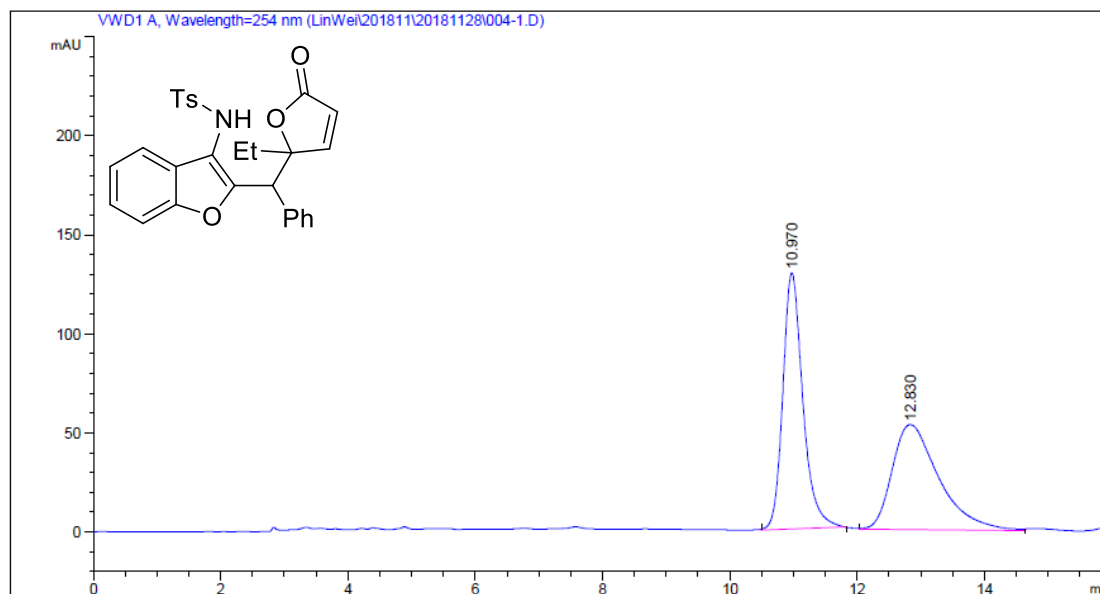

| # | Time  | Area   | Height | Width  | Symmetry | Area % |
|---|-------|--------|--------|--------|----------|--------|
| 1 | 10.97 | 2825.6 | 129.4  | 0.364  | 0.777    | 51.037 |
| 2 | 12.83 | 2710.8 | 53.1   | 0.8516 | 0.611    | 48.963 |

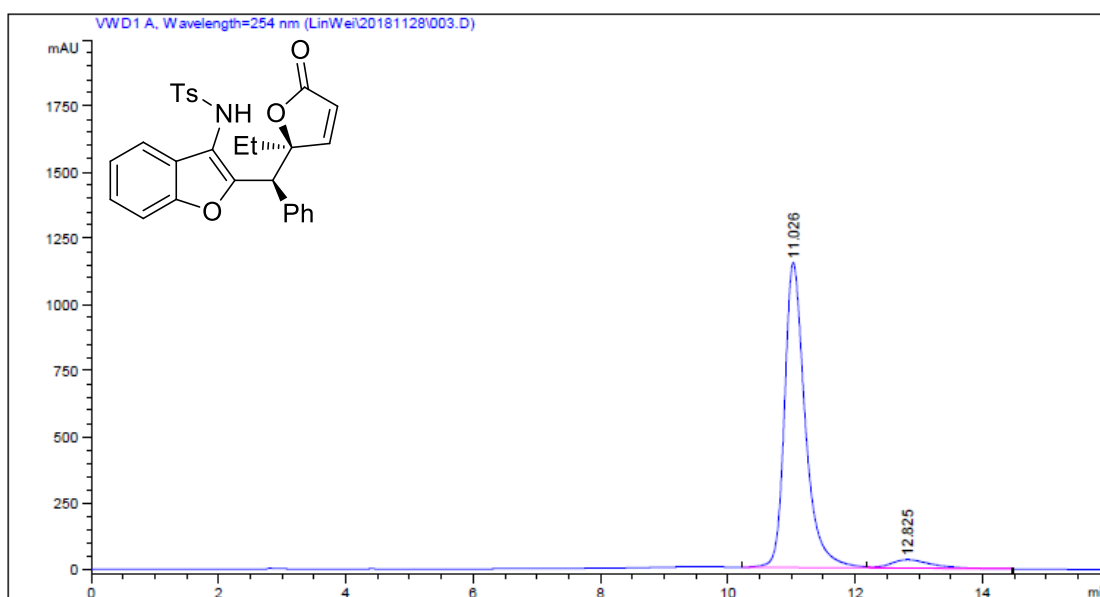

| # | Time   | Area    | Height | Width  | Symmetry | Area % |
|---|--------|---------|--------|--------|----------|--------|
| 1 | 11.026 | 26048.8 | 1151.7 | 0.3399 | 0.676    | 94.941 |
| 2 | 12.825 | 1387.9  | 32.3   | 0.6499 | 0.61     | 5.059  |

***N*-2-((*R*)-((*S*)-2-benzyl-5-oxo-2,5-dihydrofuran-2-yl)(phenyl)methyl)benzofuran-3-yl)-4-methylbenzenesulfonamide (3ac)**

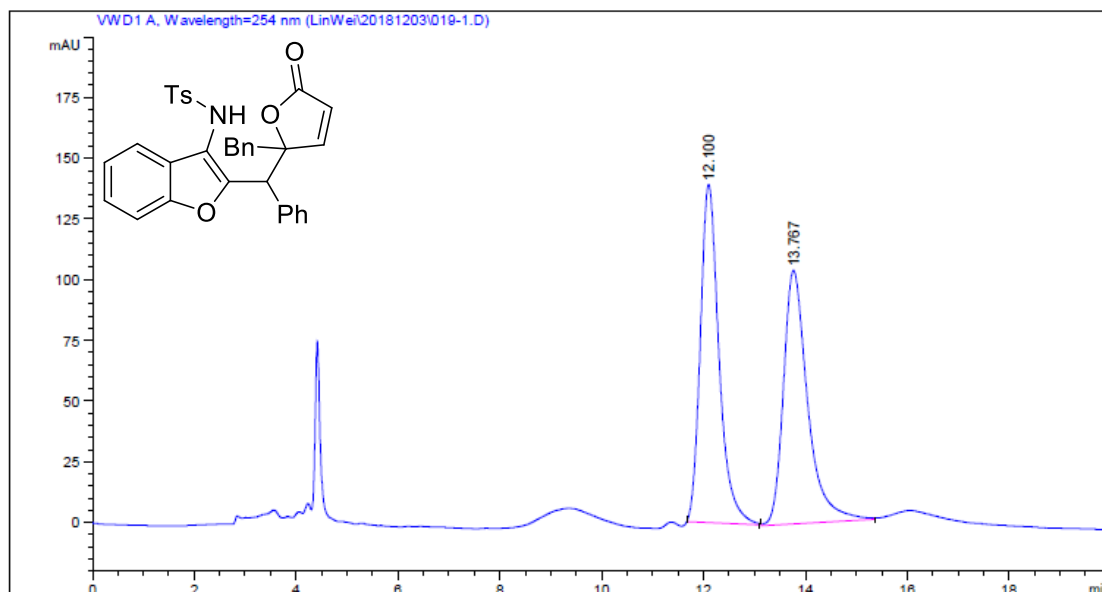

| # | Time   | Area   | Height | Width  | Symmetry | Area % |
|---|--------|--------|--------|--------|----------|--------|
| 1 | 12.1   | 3537.6 | 139.2  | 0.4236 | 0.76     | 50.603 |
| 2 | 13.767 | 3453.2 | 104.3  | 0.552  | 0.68     | 49.397 |

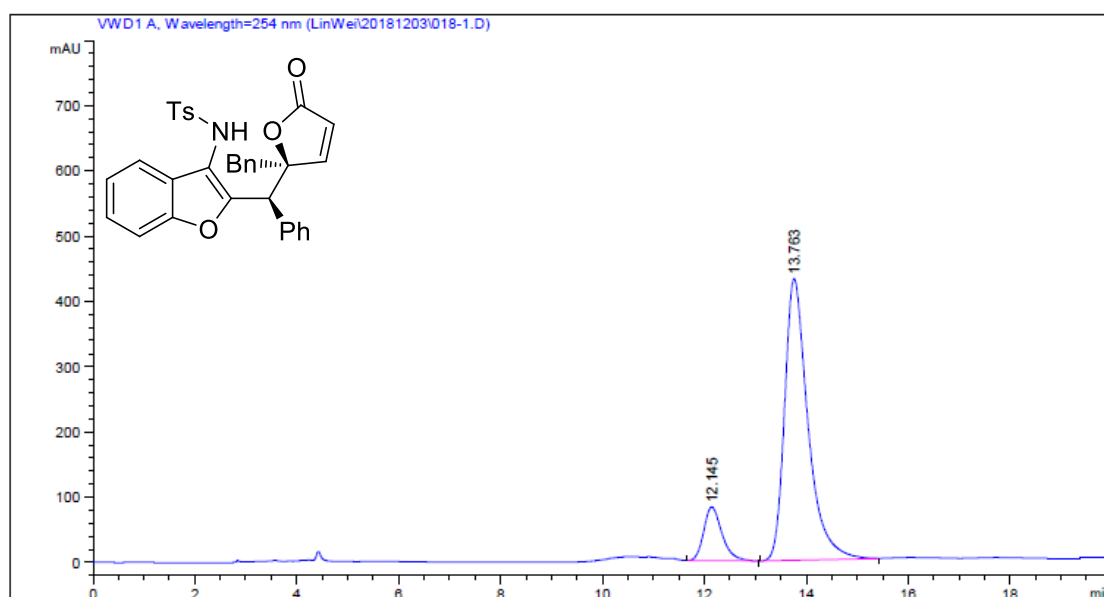

| # | Time   | Area  | Height | Width  | Symmetry | Area % |
|---|--------|-------|--------|--------|----------|--------|
| 1 | 12.145 | 2062  | 82.4   | 0.3798 | 0.731    | 13.025 |
| 2 | 13.763 | 13769 | 431.7  | 0.4781 | 0.638    | 86.975 |

**4-Methyl-N-(2-((R)-(S)-5-oxo-2-propyl-2,5-dihydrofuran-2-yl)(phenyl)methyl)benzofuran-3-yl)benzenesulfonamide (3ad)**

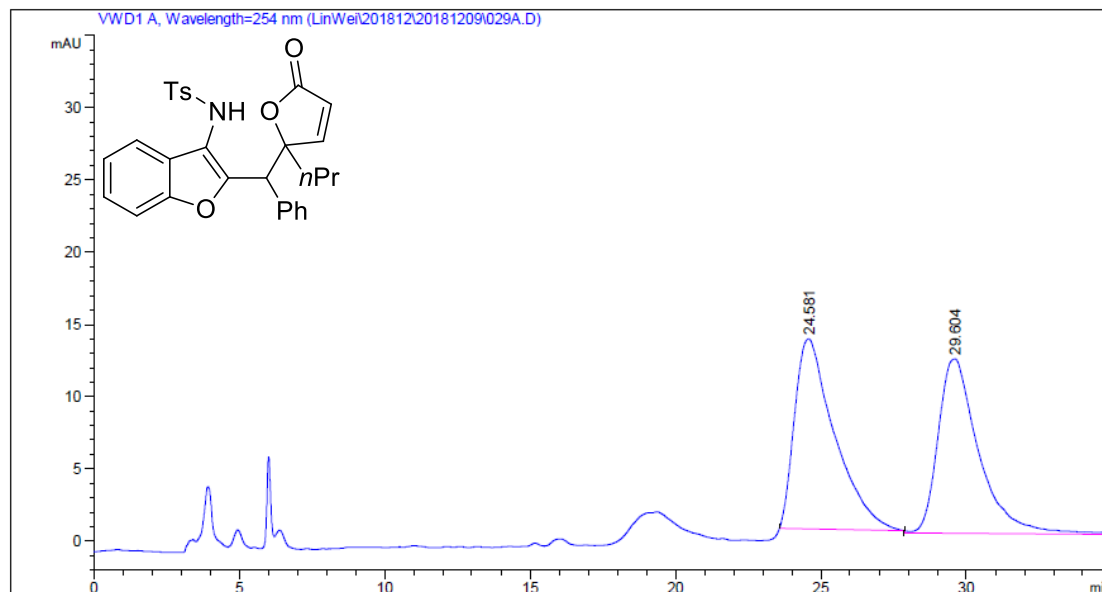

| # | Time   | Area   | Height | Width  | Symmetry | Area % |
|---|--------|--------|--------|--------|----------|--------|
| 1 | 24.581 | 1253.1 | 13.2   | 1.5879 | 0.528    | 51.526 |
| 2 | 29.604 | 1178.8 | 12.1   | 1.6269 | 0.659    | 48.474 |

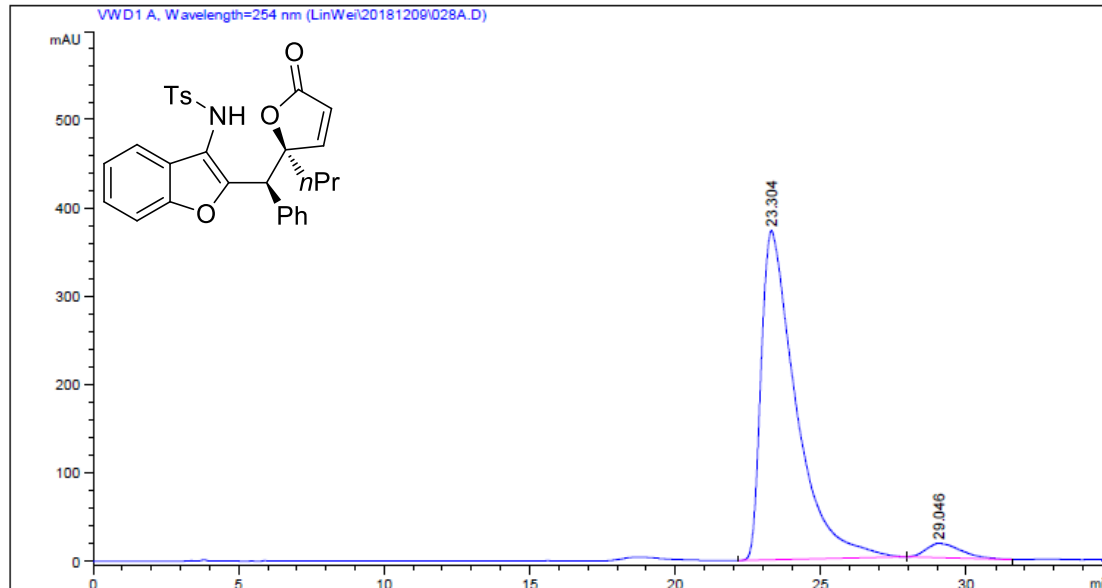

| # | Time   | Area    | Height | Width  | Symmetry | Area % |
|---|--------|---------|--------|--------|----------|--------|
| 1 | 23.304 | 30860.7 | 372.6  | 1.1964 | 0.383    | 95.859 |
| 2 | 29.046 | 1333.3  | 16.1   | 1.1031 | 0.547    | 4.141  |



**4-Methyl-N-(2-((R)-(S)-5-oxo-2-phenyl-2,5-dihydrofuran-2-yl)(phenyl)methyl)benzenesulfonamide (3ae)**

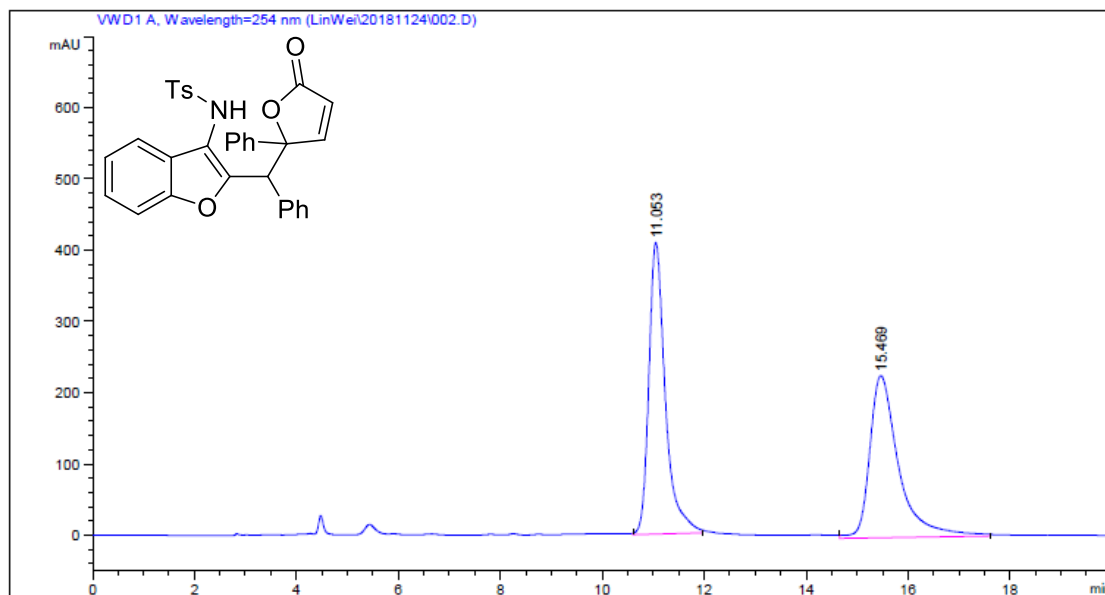

| # | Time   | Area   | Height | Width  | Symmetry | Area % |
|---|--------|--------|--------|--------|----------|--------|
| 1 | 11.053 | 9173.3 | 409.4  | 0.3735 | 0.706    | 50.552 |
| 2 | 15.469 | 8972.9 | 227.3  | 0.6579 | 0.601    | 49.448 |

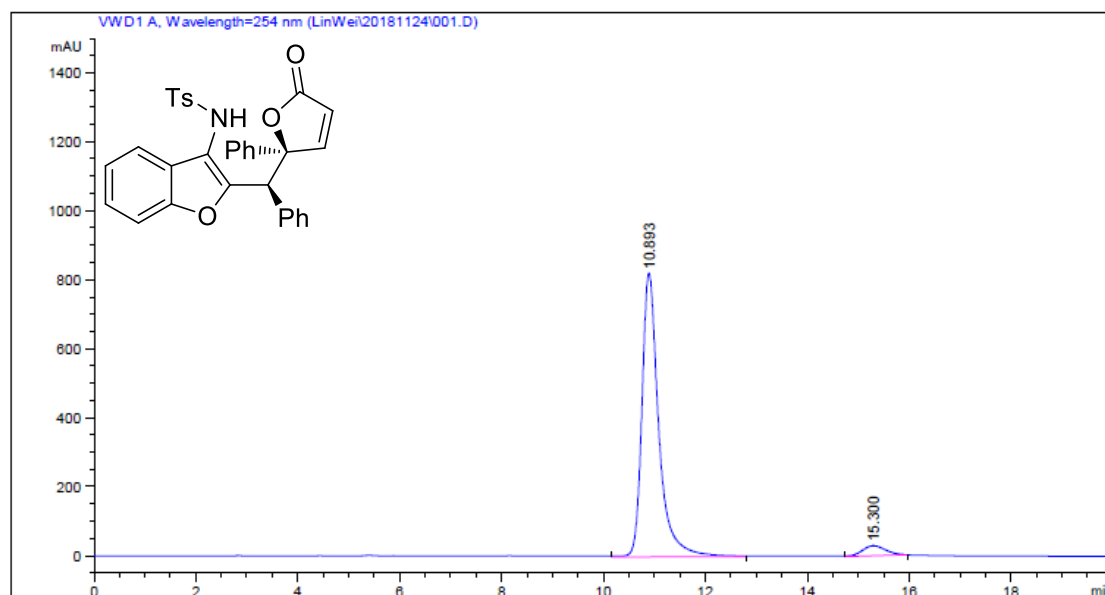

| # | Time   | Area    | Height | Width  | Symmetry | Area % |
|---|--------|---------|--------|--------|----------|--------|
| 1 | 10.893 | 18846.8 | 822.4  | 0.382  | 0.676    | 95.308 |
| 2 | 15.3   | 927.9   | 29     | 0.5324 | 0.888    | 4.692  |

***N*-2-((*R*)-((*S*)-2-(4-fluorophenyl)-5-oxo-2,5-dihydrofuran-2-yl)(phenyl)methyl)benzofuran-3-yl)-4-methylbenzenesulfonamide (3af)**

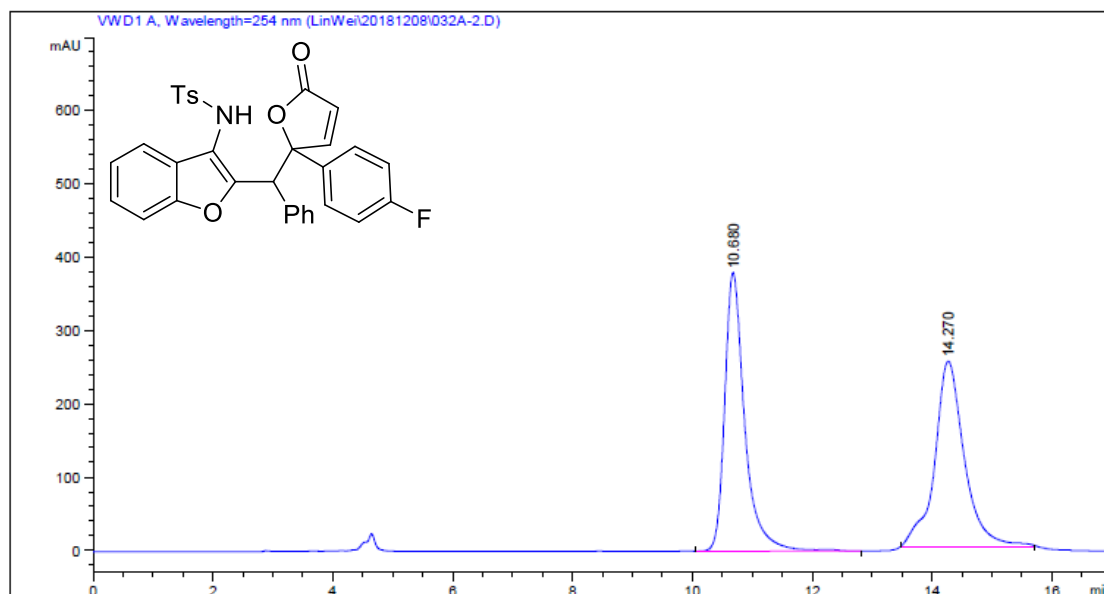

| # | Time  | Area   | Height | Width  | Symmetry | Area % |
|---|-------|--------|--------|--------|----------|--------|
| 1 | 10.68 | 8831.8 | 379.5  | 0.3475 | 0.65     | 50.008 |
| 2 | 14.27 | 8828.9 | 253.8  | 0.5798 | 0.815    | 49.992 |

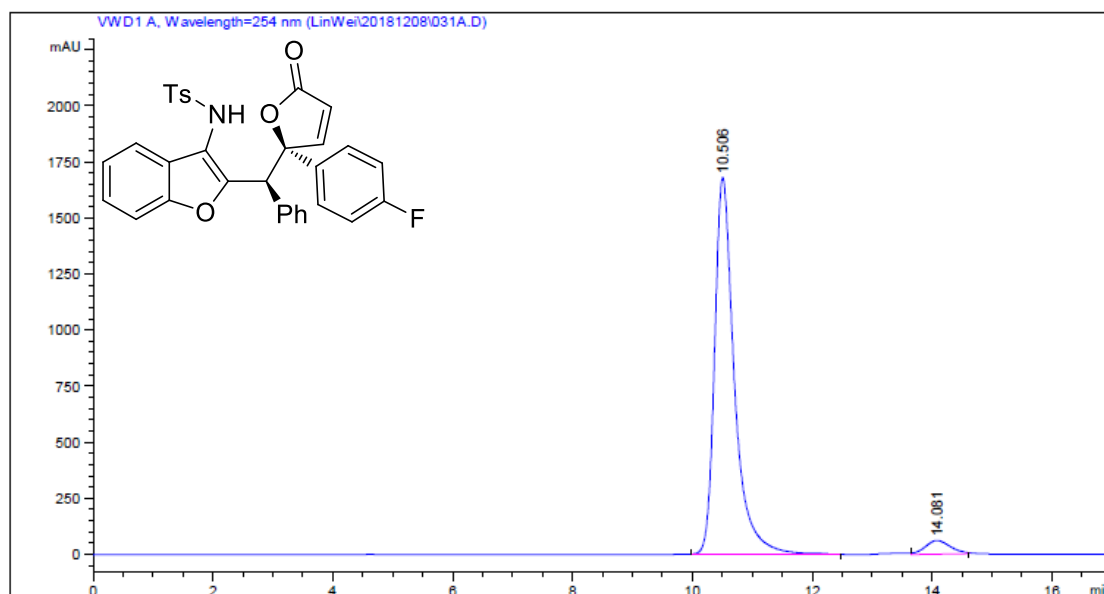

| # | Time   | Area    | Height | Width  | Symmetry | Area % |
|---|--------|---------|--------|--------|----------|--------|
| 1 | 10.506 | 38842.9 | 1681.3 | 0.3851 | 0.655    | 95.699 |
| 2 | 14.081 | 1745.6  | 60.3   | 0.4823 | 0.876    | 4.301  |

***N*-2-((*R*)-((*S*)-2-(4-methoxyphenyl)-5-oxo-2,5-dihydrofuran-2-yl)(phenyl)methyl)benzofuran-3-yl)-4-methylbenzenesulfonamide (3ag)**

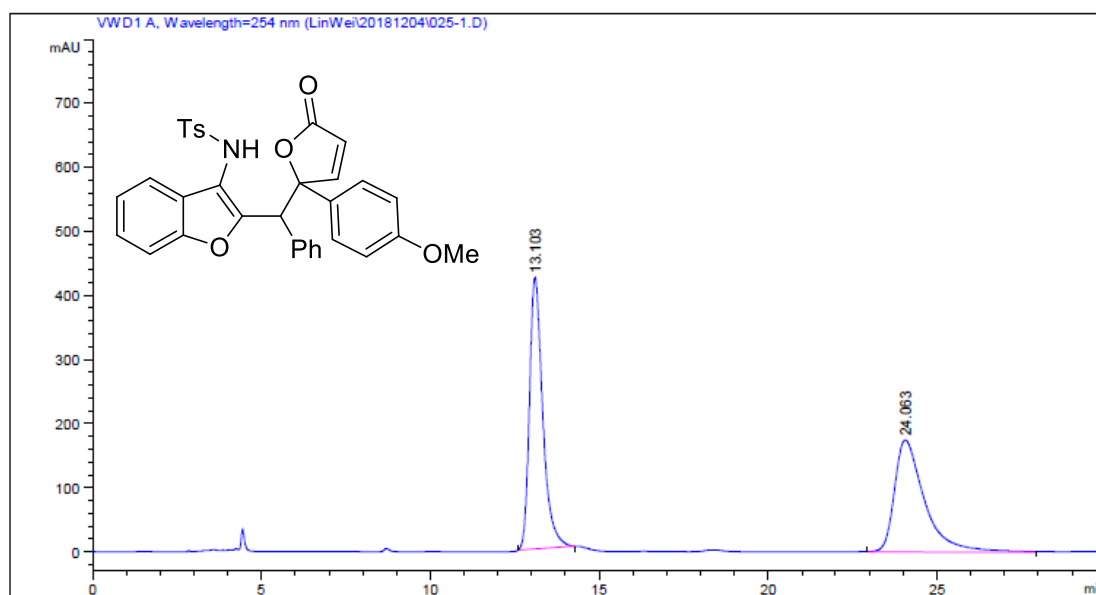

| # | Time   | Area    | Height | Width  | Symmetry | Area % |
|---|--------|---------|--------|--------|----------|--------|
| 1 | 13.103 | 11493.4 | 423.9  | 0.4519 | 0.695    | 51.154 |
| 2 | 24.063 | 10974.8 | 175.1  | 1.0449 | 0.532    | 48.846 |

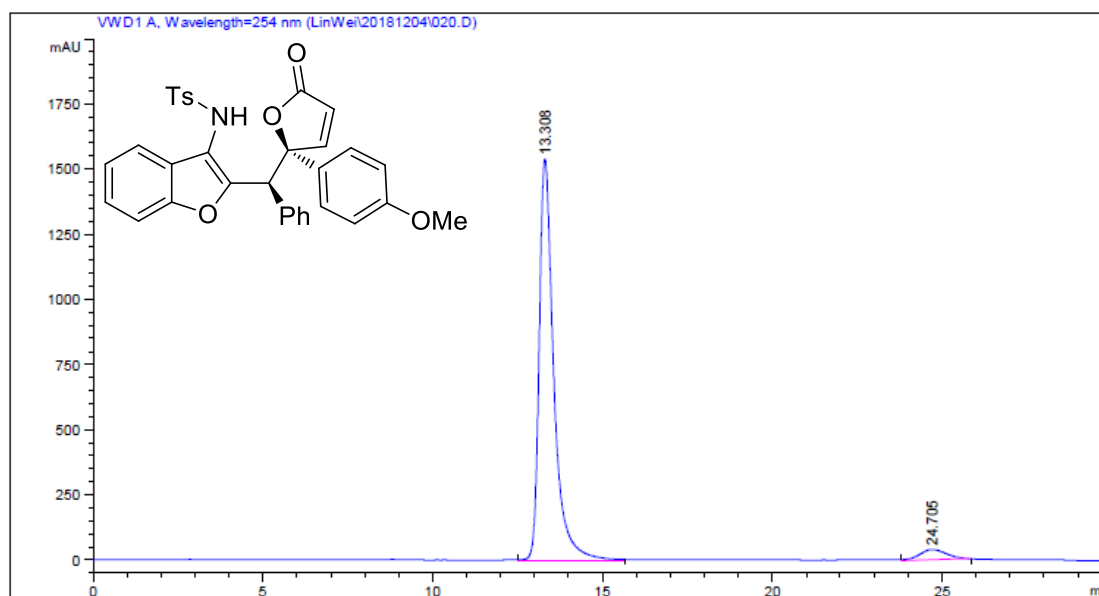

| # | Time   | Area    | Height | Width  | Symmetry | Area % |
|---|--------|---------|--------|--------|----------|--------|
| 1 | 13.308 | 45740.9 | 1539.3 | 0.4953 | 0.61     | 95.472 |
| 2 | 24.705 | 2169.3  | 39.4   | 0.9166 | 0.916    | 4.528  |

***N*-2-((*R*)-((*S*)-2-ethyl-4-methyl-5-oxo-2,5-dihydrofuran-2-yl)(phenyl)methyl)benzofuran-3-yl)-4-methylbenzenesulfonamide (3ah)**

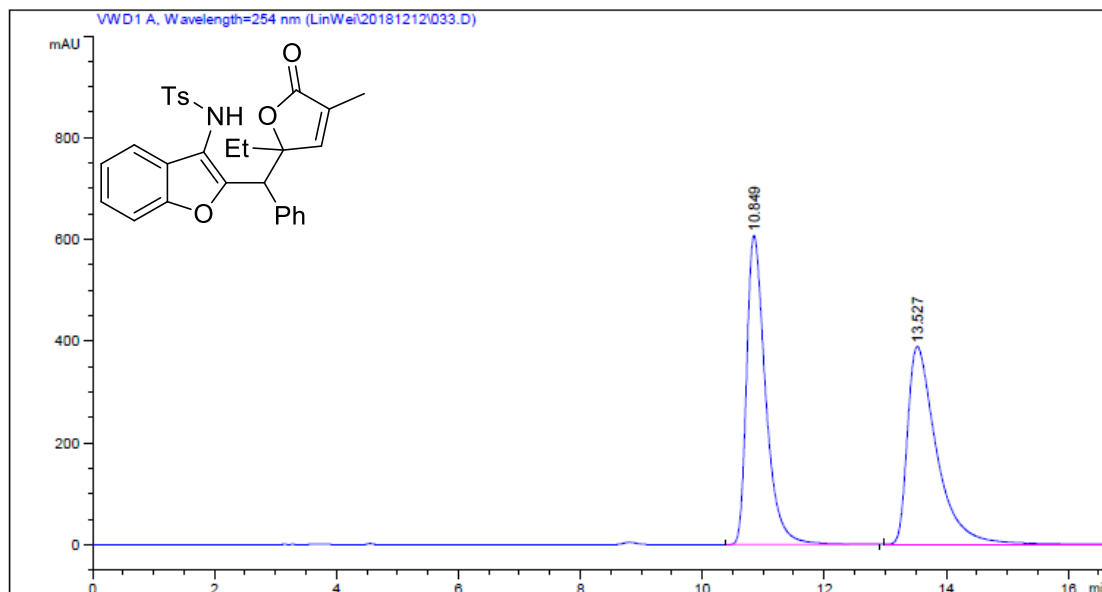

| # | Time   | Area    | Height | Width  | Symmetry | Area % |
|---|--------|---------|--------|--------|----------|--------|
| 1 | 10.849 | 13107.3 | 607.4  | 0.3288 | 0.589    | 50.471 |
| 2 | 13.527 | 12862.5 | 388.3  | 0.4934 | 0.461    | 49.529 |

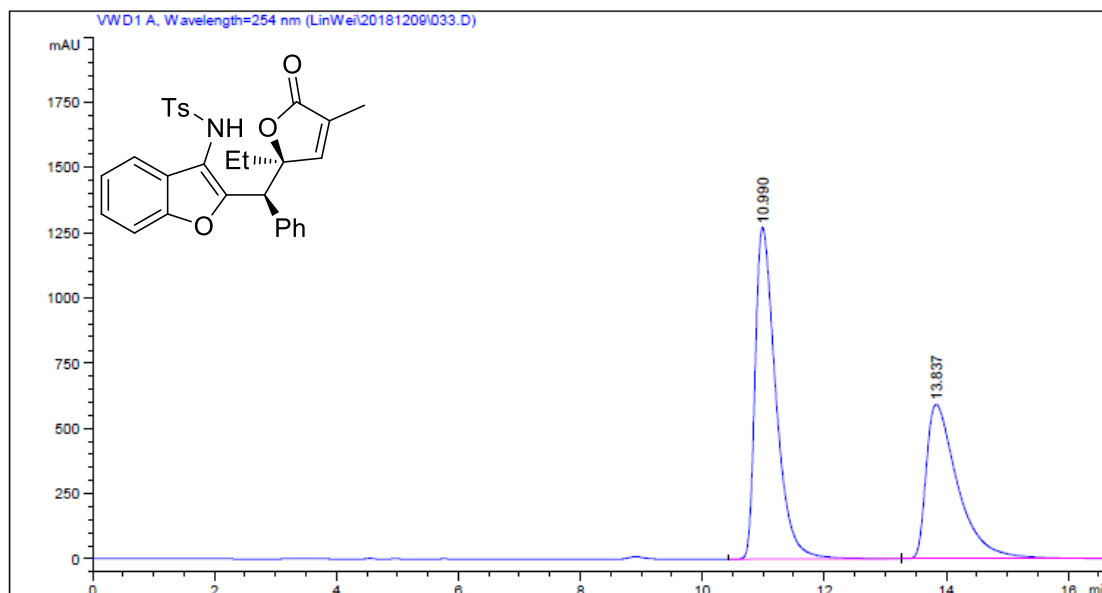

| # | Time   | Area    | Height | Width  | Symmetry | Area % |
|---|--------|---------|--------|--------|----------|--------|
| 1 | 10.99  | 29831   | 1271.1 | 0.3598 | 0.512    | 58.303 |
| 2 | 13.837 | 21334.5 | 591.8  | 0.5416 | 0.416    | 41.697 |

## G: NMR Analysis

### 4-Methyl-*N*-(2-((*R*)-((*S*)-2-methyl-5-oxo-2,5-dihydrofuran-2-yl)(phenyl)methyl)benzenesulfonamide (3aa)

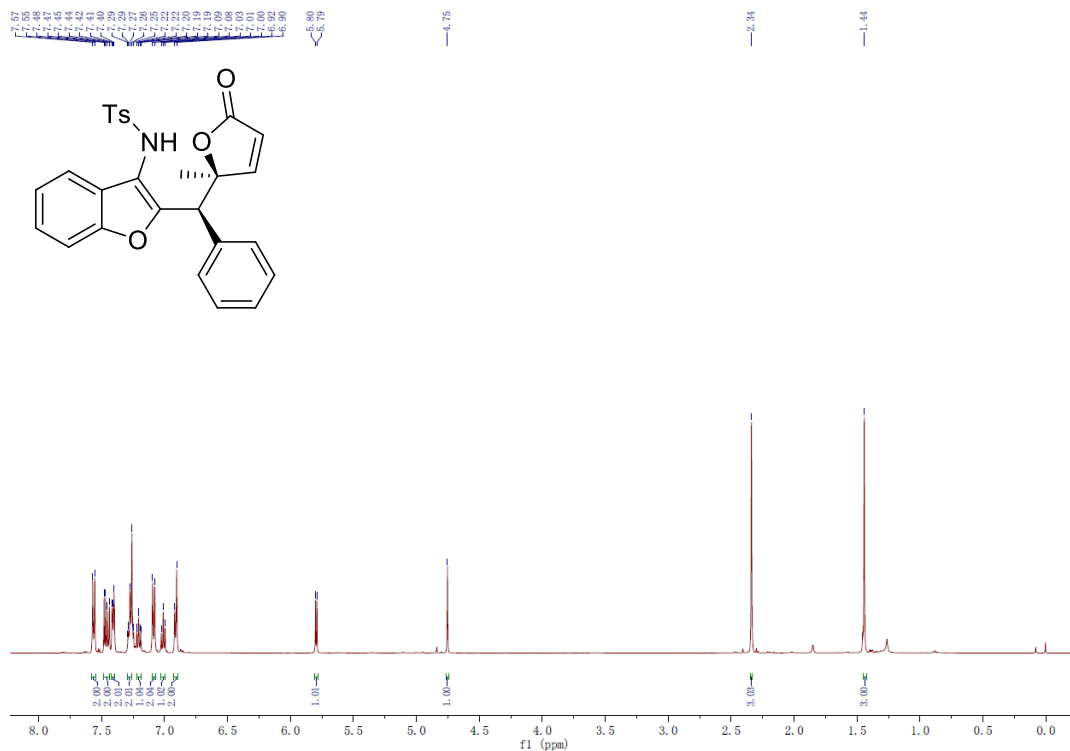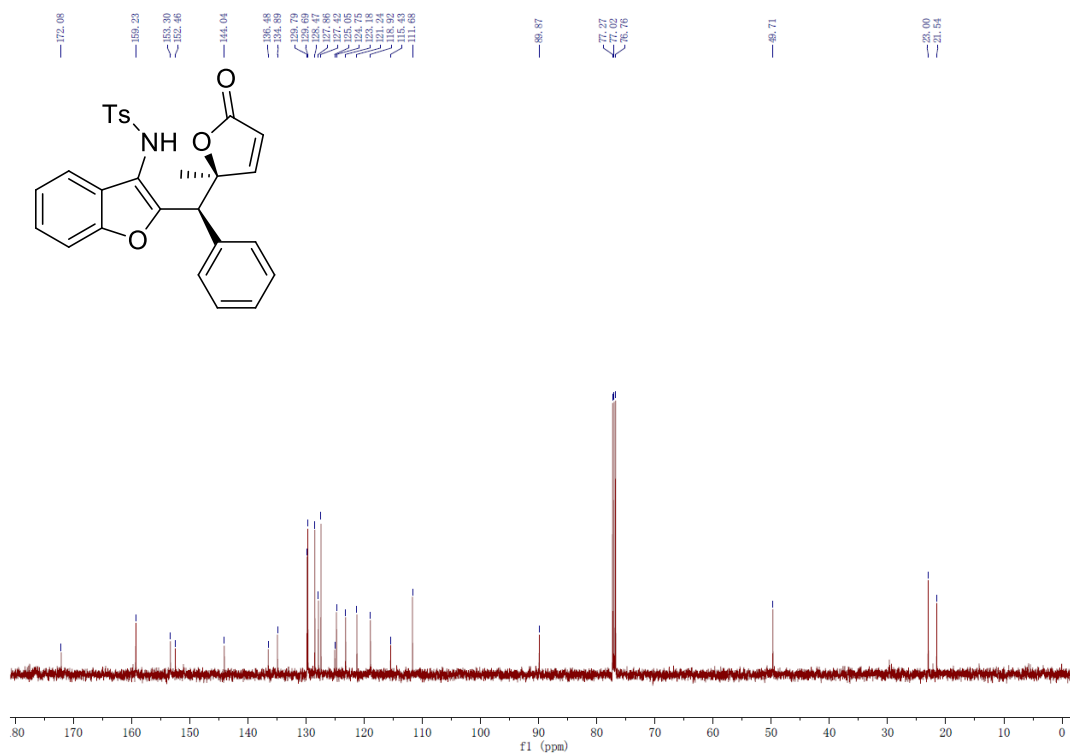

***N*-2-((*R*)-(4-fluorophenyl)((*S*)-2-methyl-5-oxo-2,5-dihydrofuran-2-yl)methyl)benzofuran-3-yl)-4-methylbenzenesulfonamide (**3ba**)**

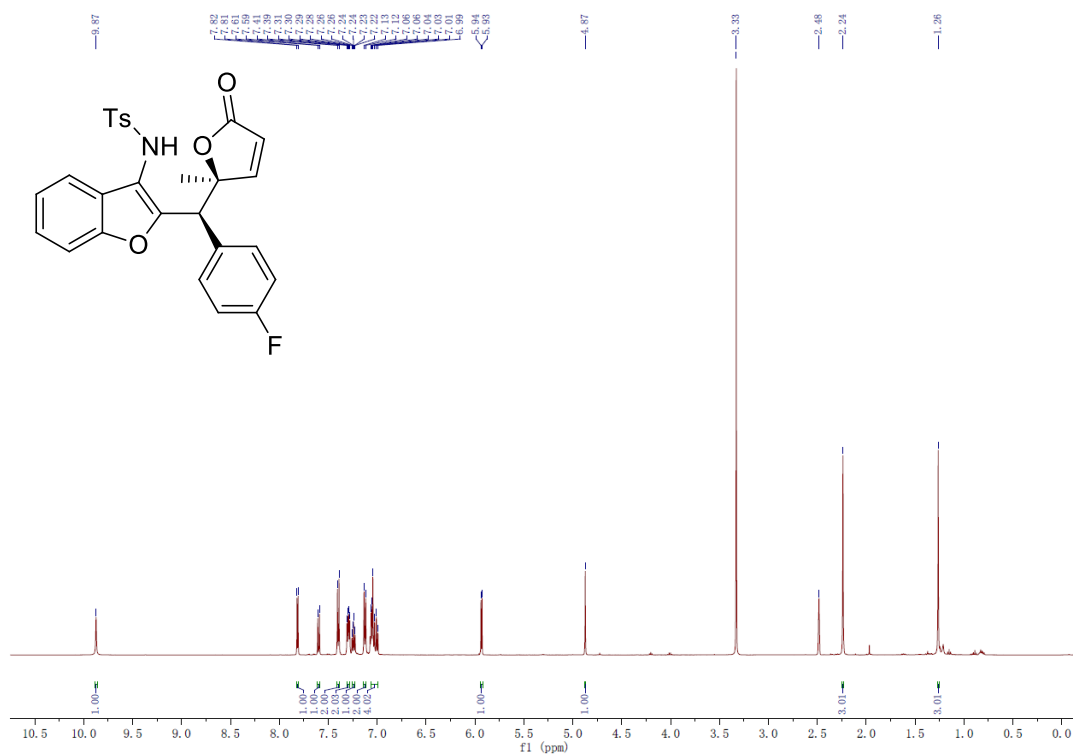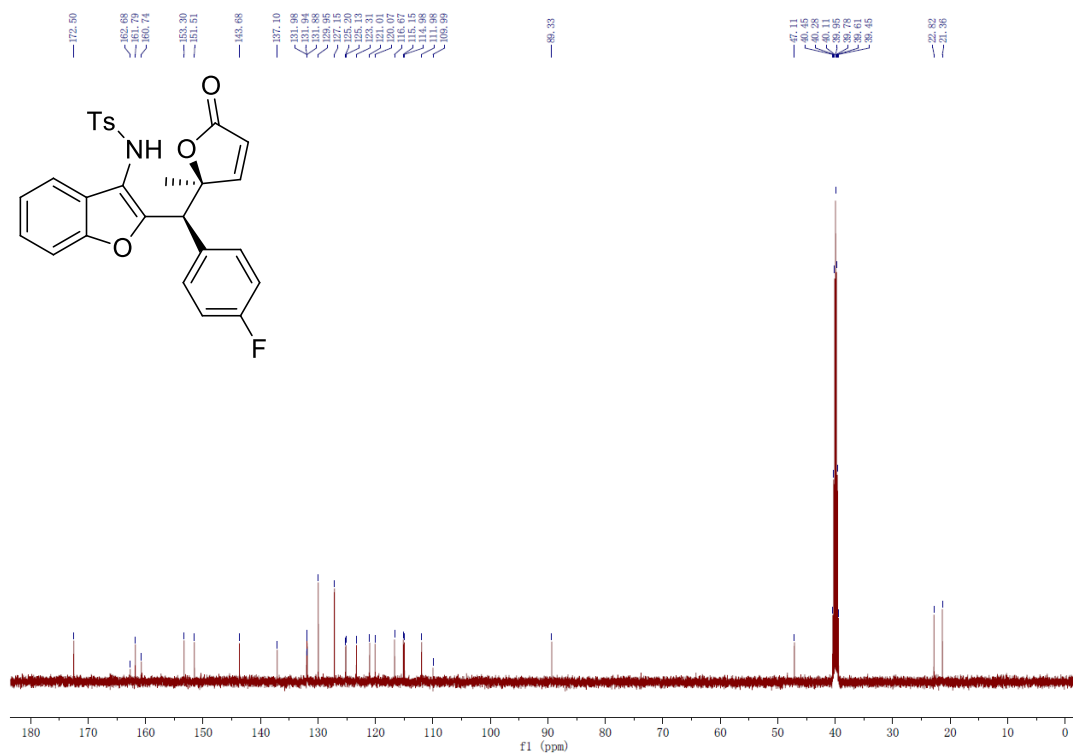

***N*-2-((*R*)-(4-chlorophenyl)((*S*)-2-methyl-5-oxo-2,5-dihydrofuran-2-yl)methyl)benzofuran-3-yl)-4-methylbenzenesulfonamide(3ca)**

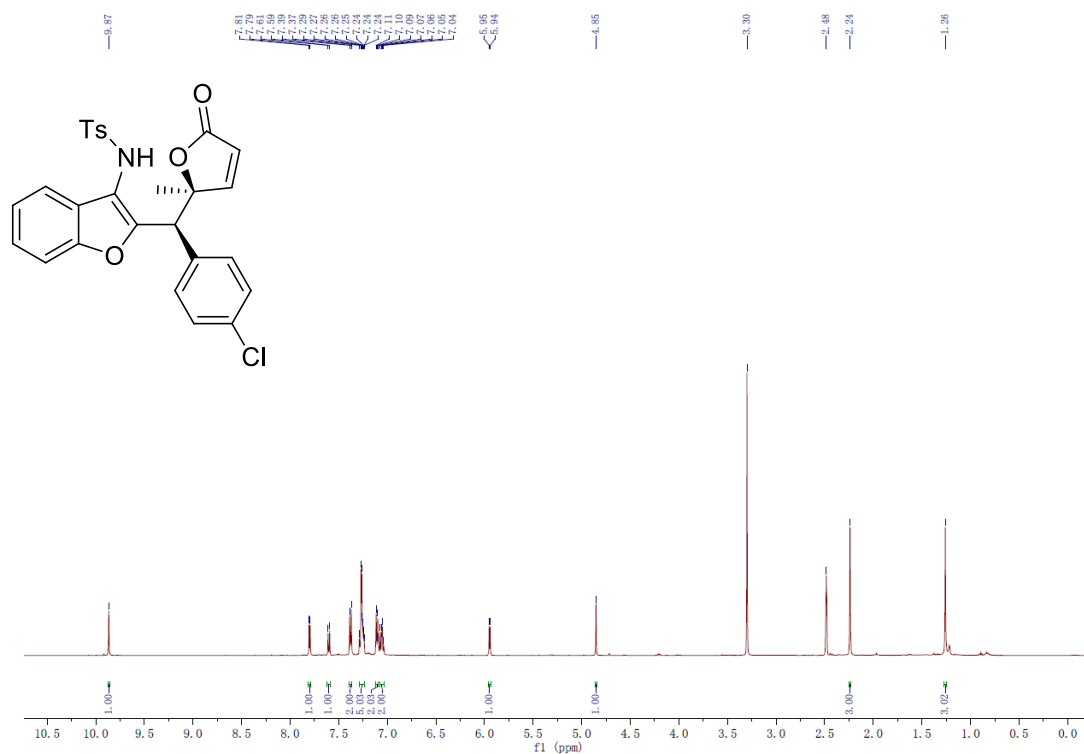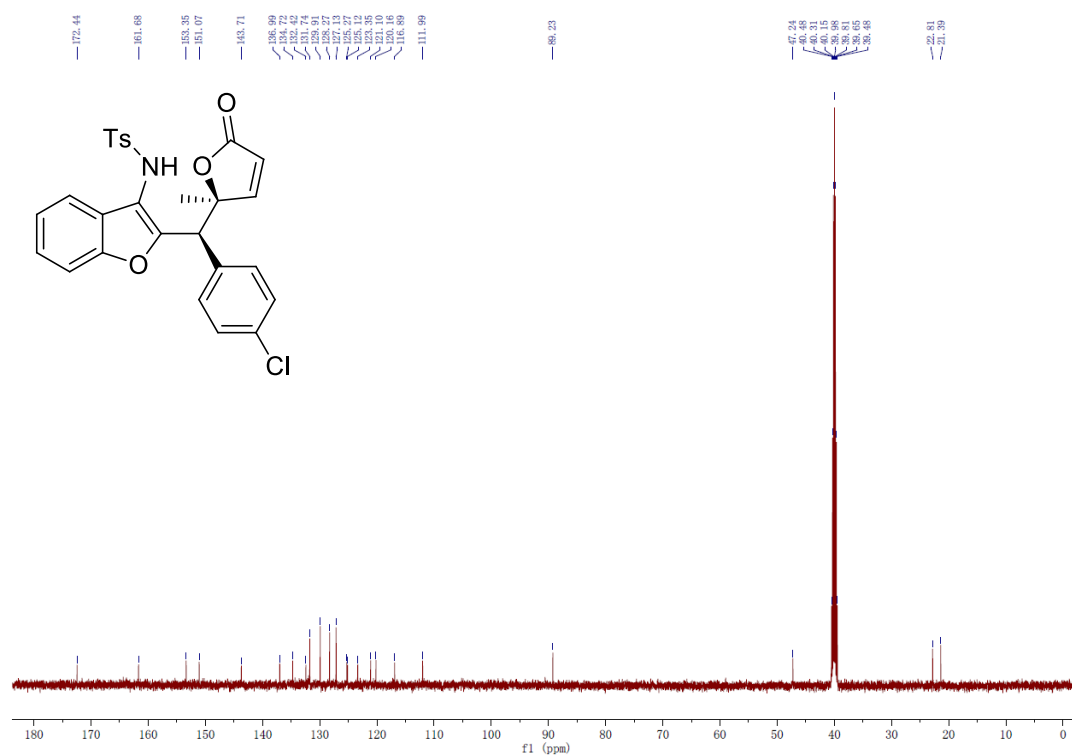

***N*-2-((*R*)-(4-bromophenyl)((*S*)-2-methyl-5-oxo-2,5-dihydrofuran-2-yl)methyl)benzofuran-3-yl)-4-methylbenzenesulfonamide (3da)**

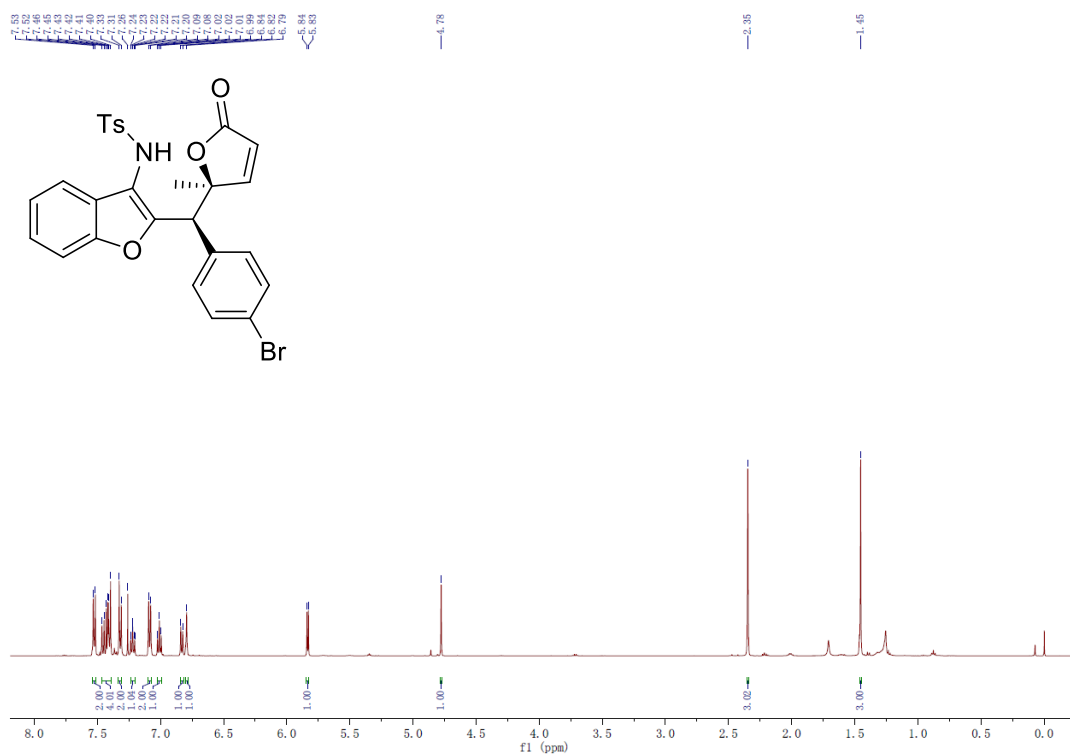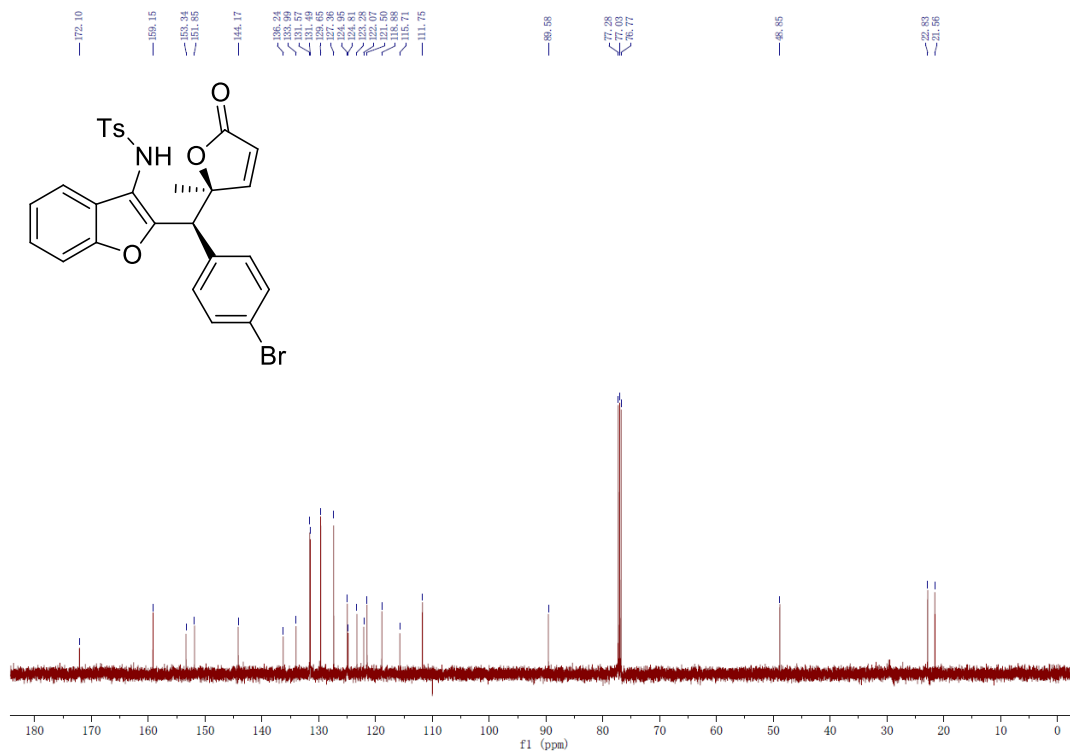



**4-Methyl-N-(2-((R)-(S)-2-methyl-5-oxo-2,5-dihydrofuran-2-yl)(p-tolyl)methyl)benzofuran-3-yl)benzenesulfonamide (3ea)**

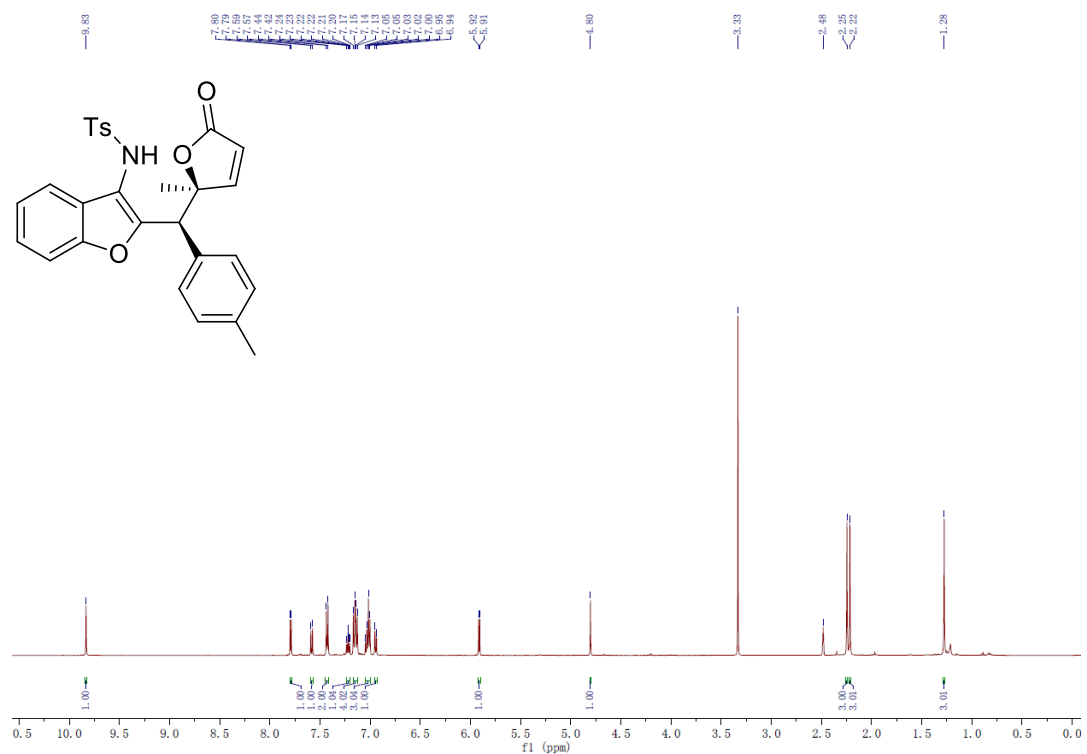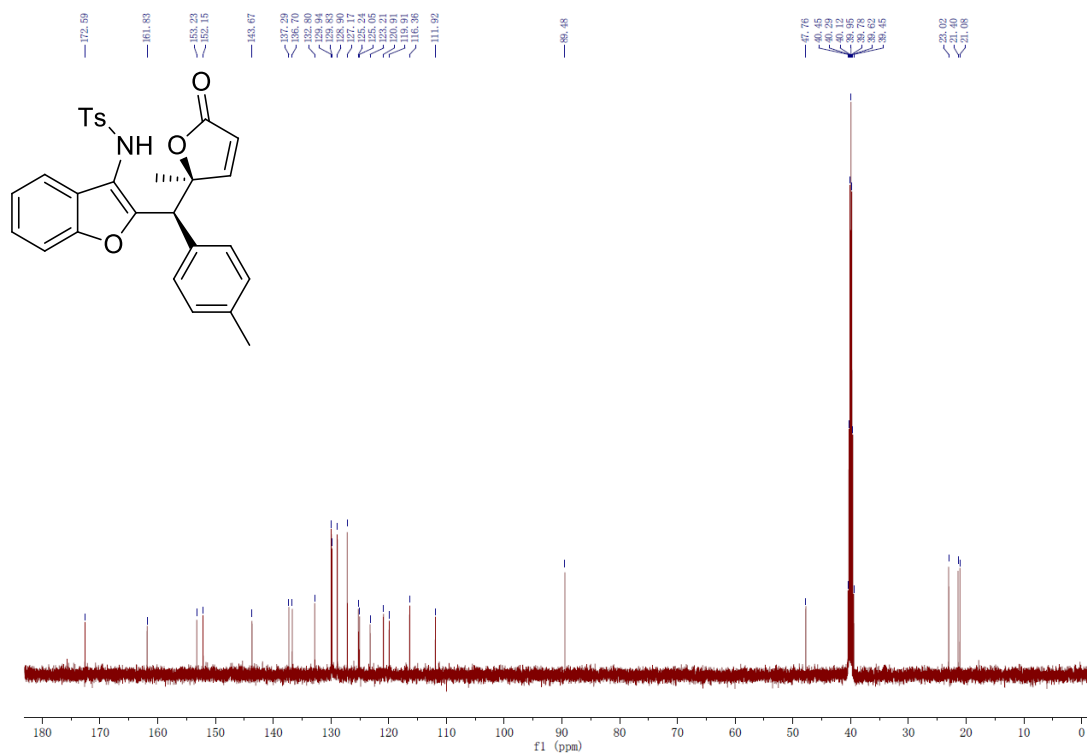

***N*-(2-((*R*)-(4-methoxyphenyl)((*S*)-2-methyl-5-oxo-2,5-dihydrofuran-2-yl)methyl)benzofuran-3-yl)-4-methylbenzenesulfonamide (3fa)**

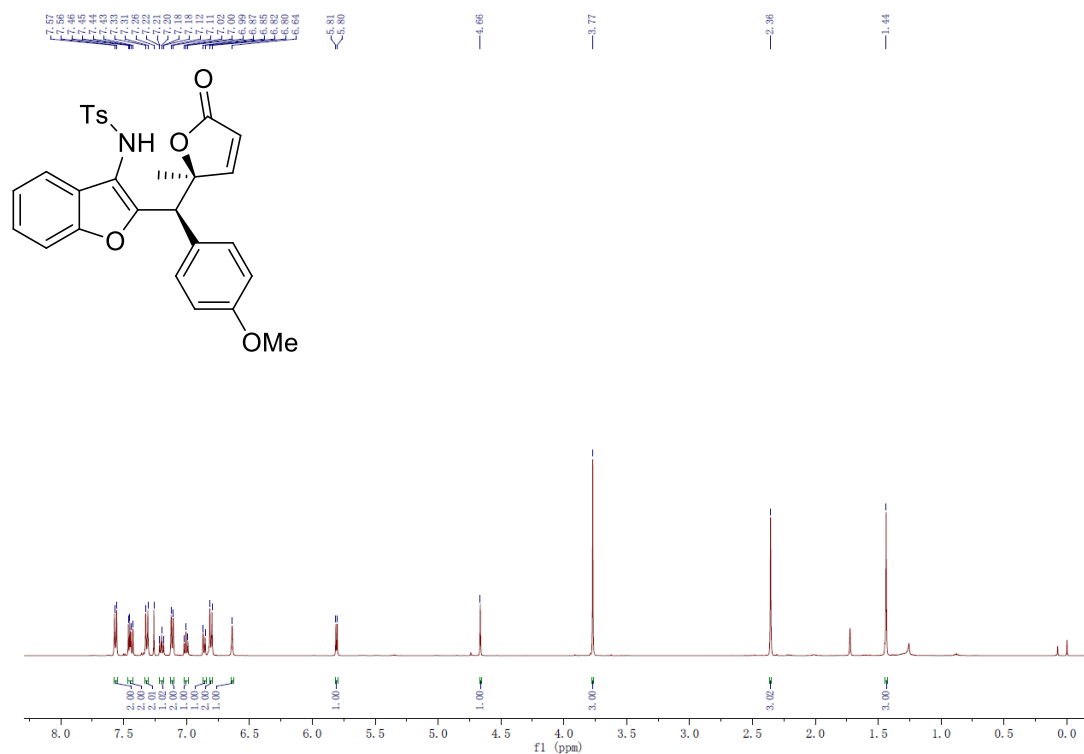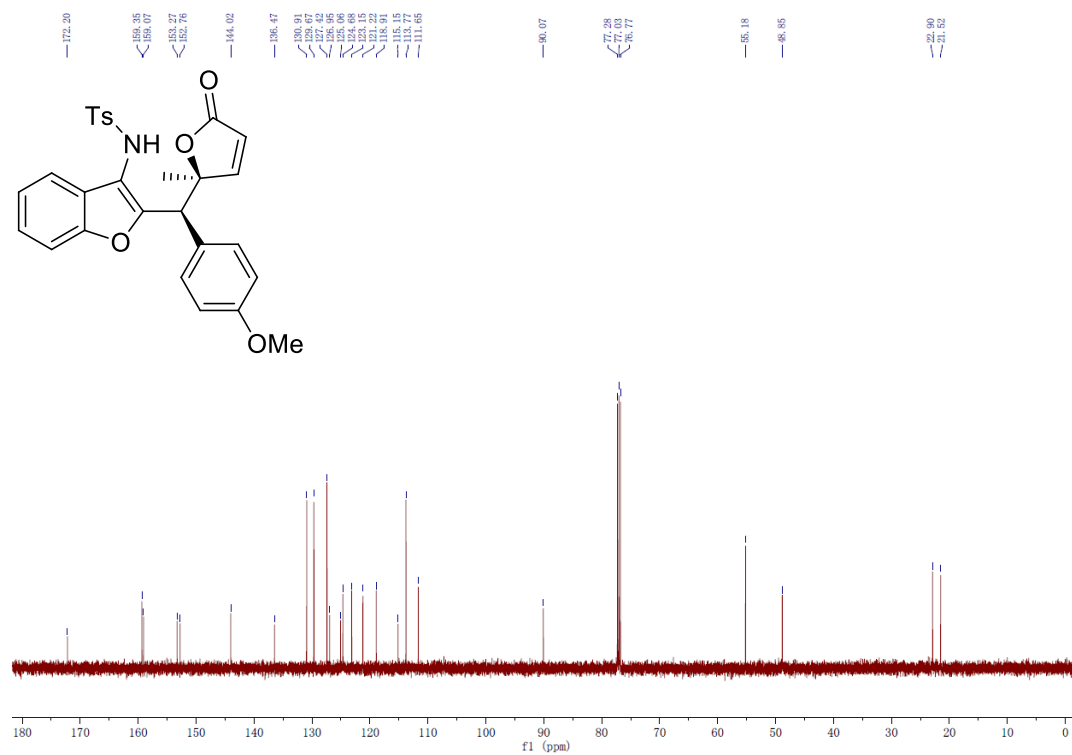

***N*-2-((*R*)-(3-fluorophenyl)((*S*)-2-methyl-5-oxo-2,5-dihydrofuran-2-yl)methyl)benzofuran-3-yl)-4-methylbenzenesulfonamide (3ga)**

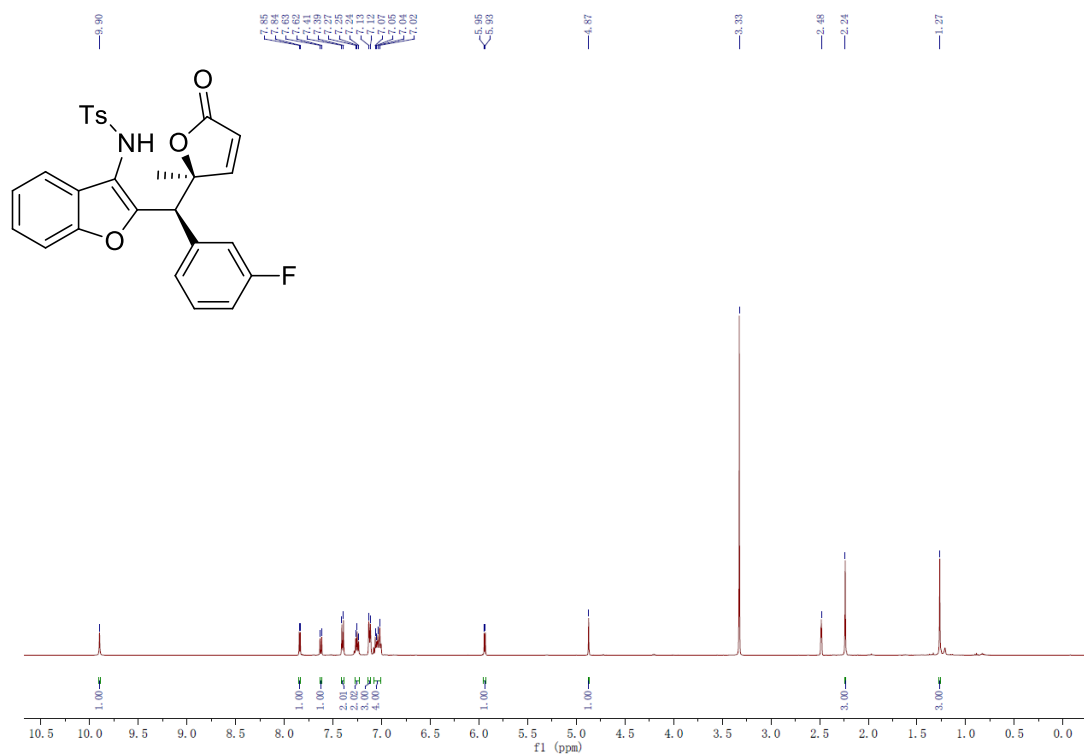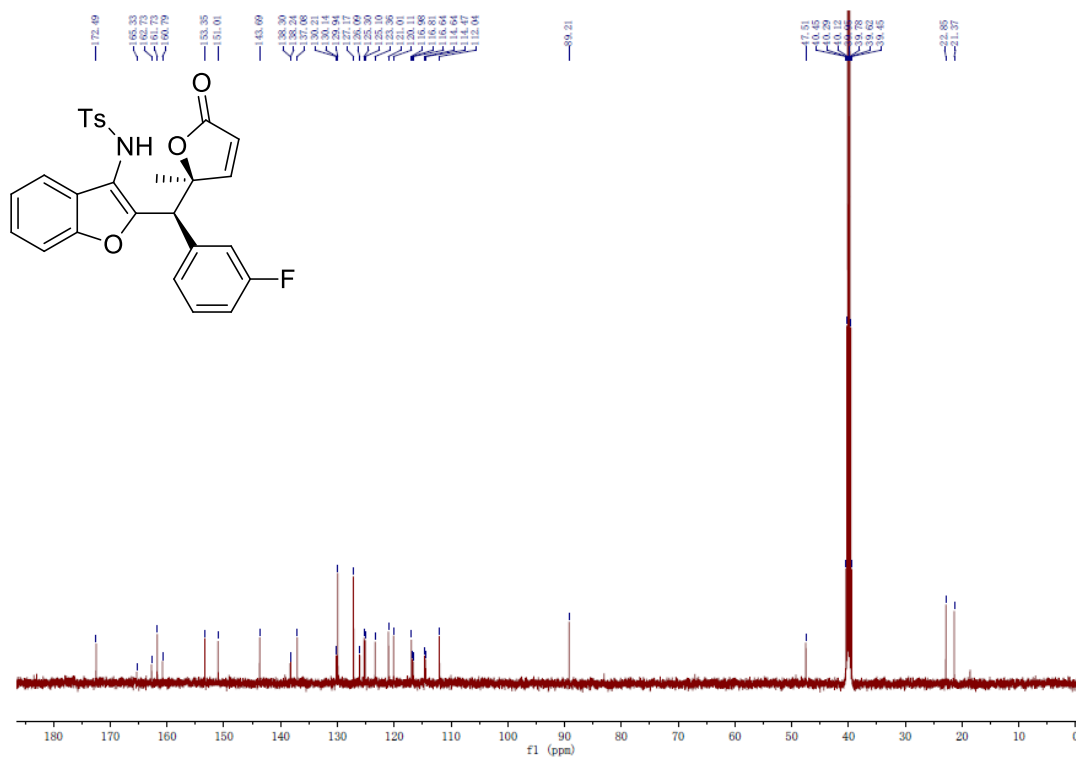

***N*-2-((*R*)-(3-chlorophenyl)((*S*)-2-methyl-5-oxo-2,5-dihydrofuran-2-yl)methyl)benzofuran-3-yl)-4-methylbenzenesulfonamide (3ha)**

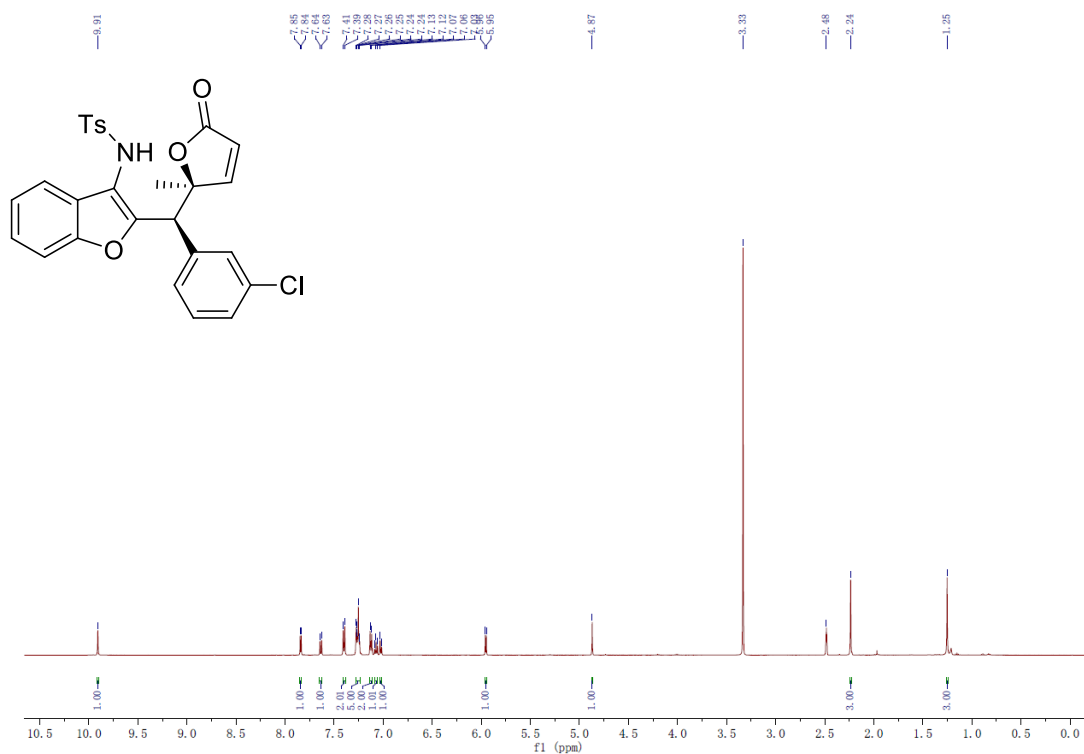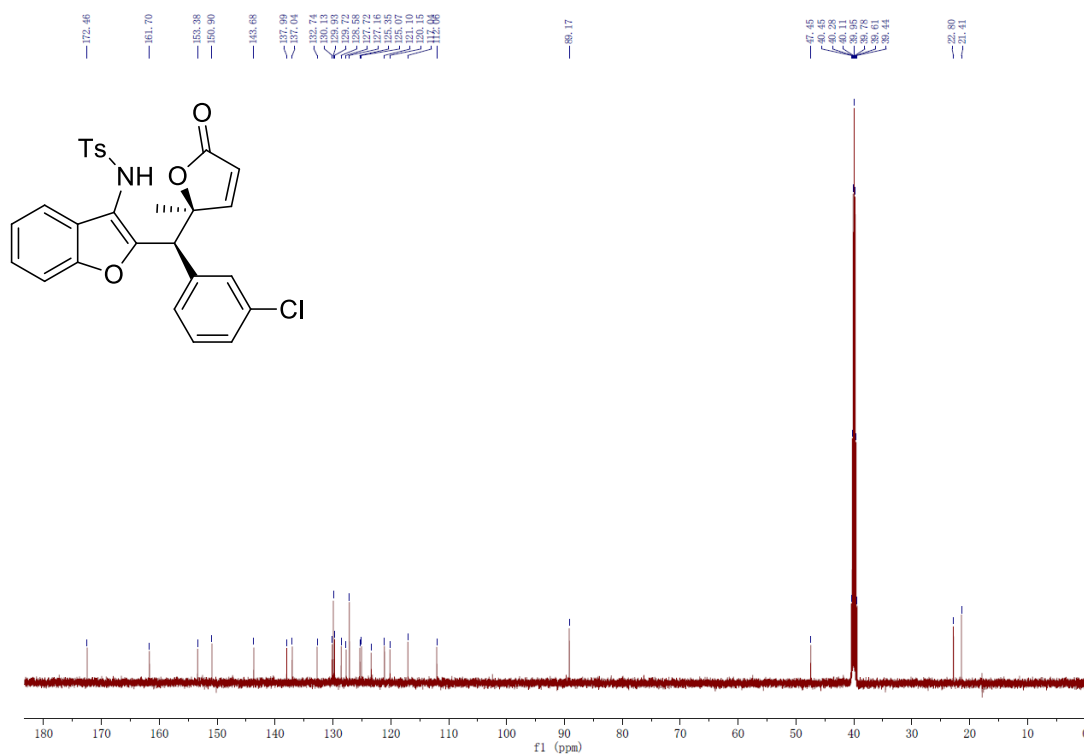

***N*-2-((*R*)-(3-bromophenyl)((*S*)-2-methyl-5-oxo-2,5-dihydrofuran-2-yl)methyl)benzofuran-3-yl)-4-methylbenzenesulfonamide (3ia)**

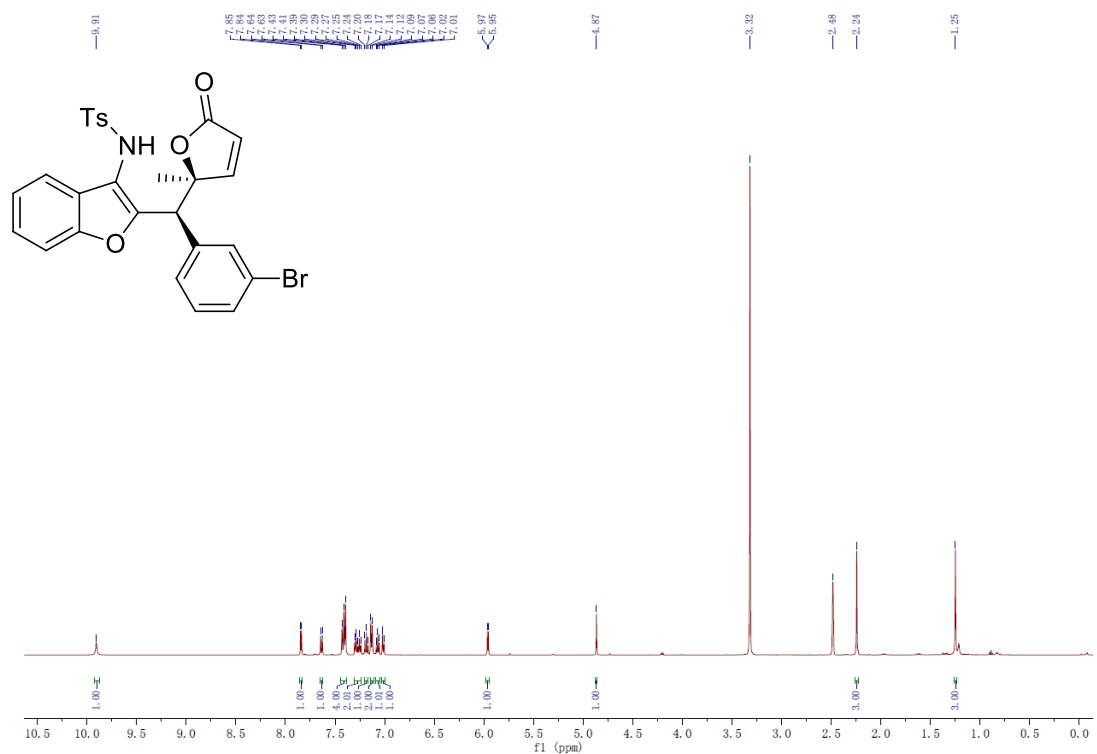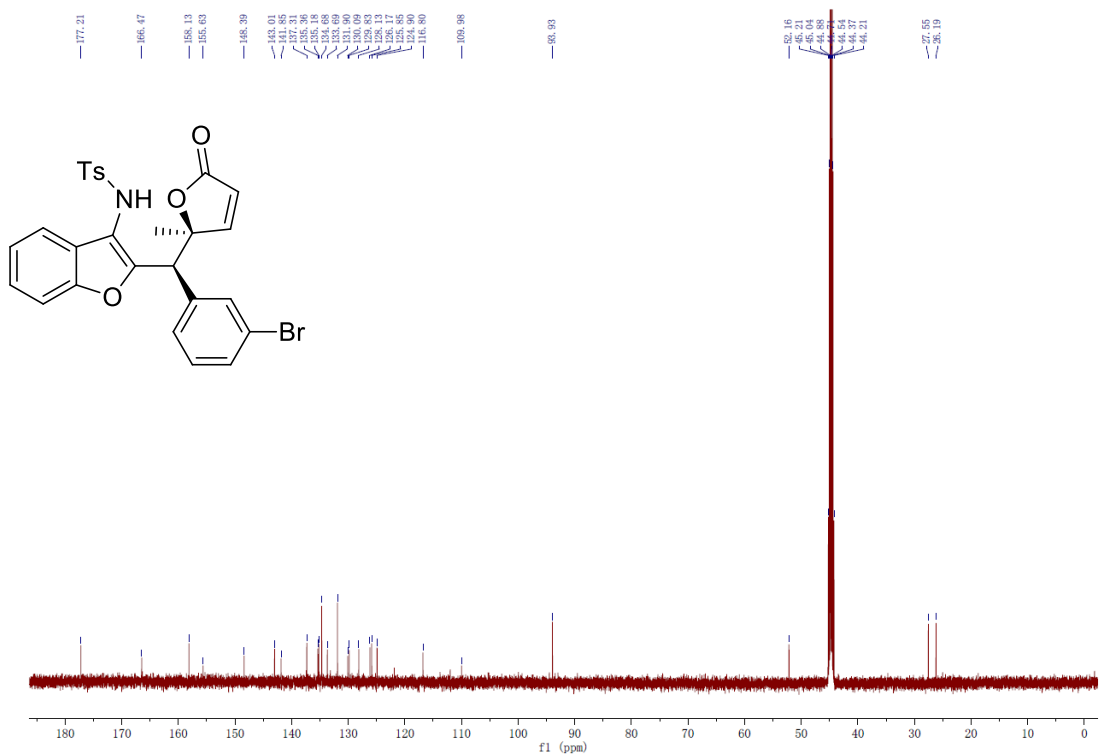

### 4-Methyl-N-(2-((R)-(S)-2-methyl-5-oxo-2,5-dihydrofuran-2-yl)(m-tolyl)methyl)benzofuran-3-yl)benzenesulfonamide (3ja)

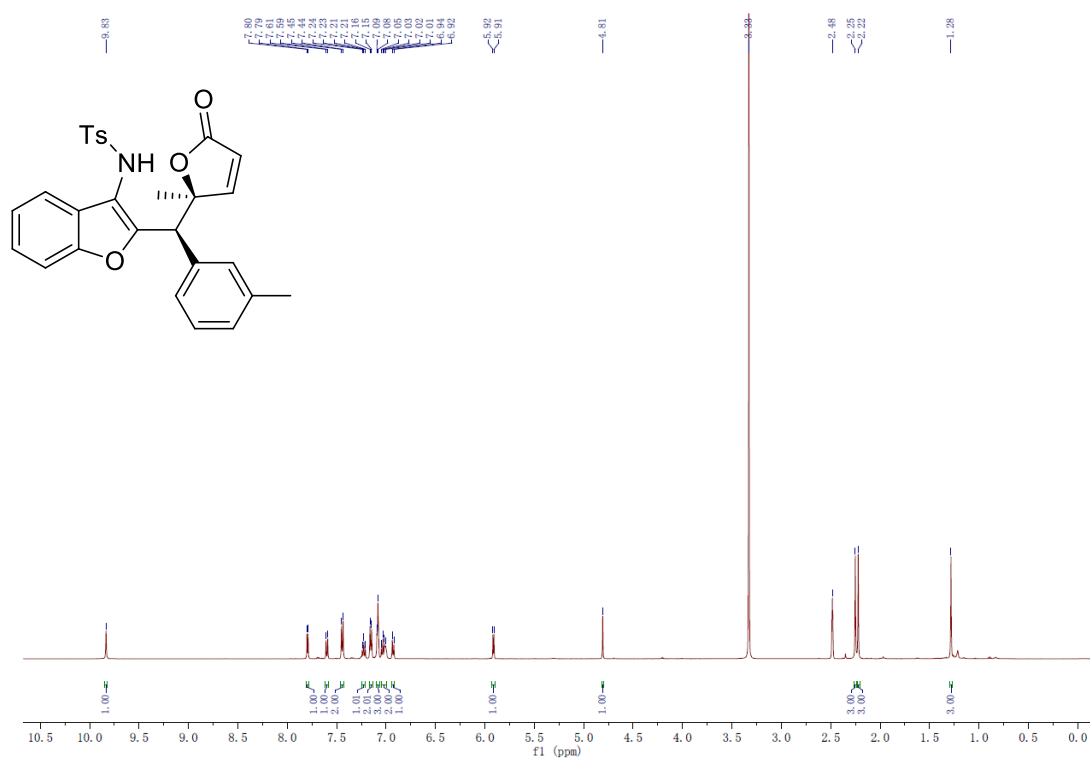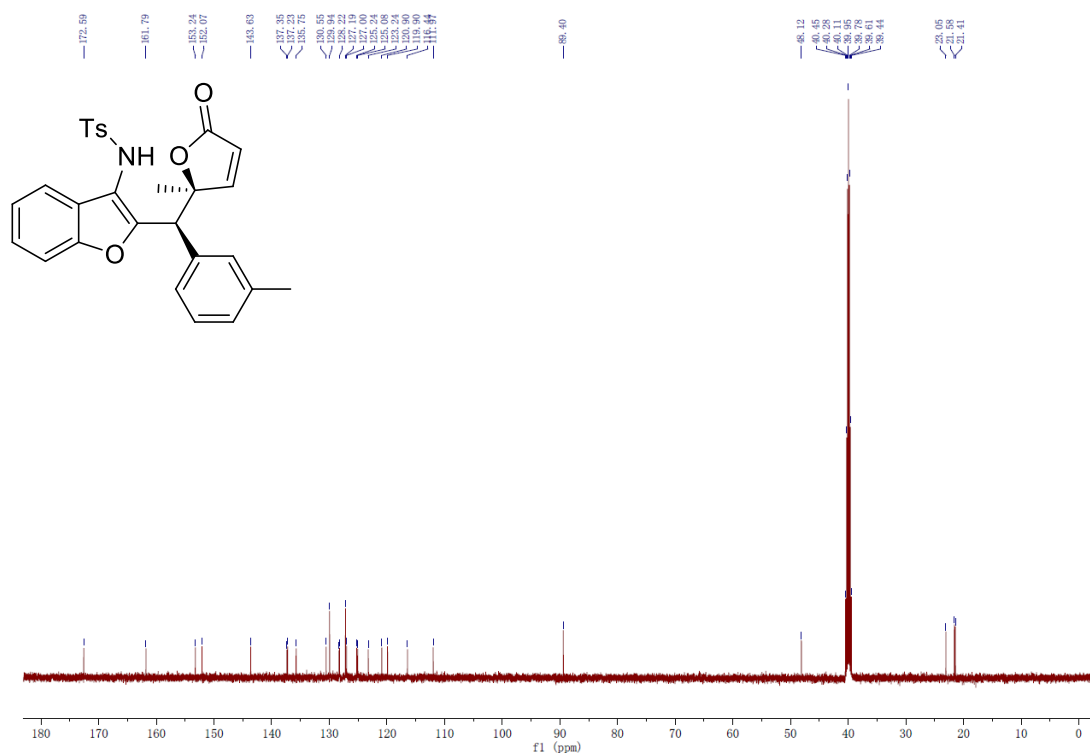

***N*-2-((*R*)-(3-methoxyphenyl)((*S*)-2-methyl-5-oxo-2,5-dihydrofuran-2-yl)methyl)benzofuran-3-yl)-4-methylbenzenesulfonamide (3ka)**

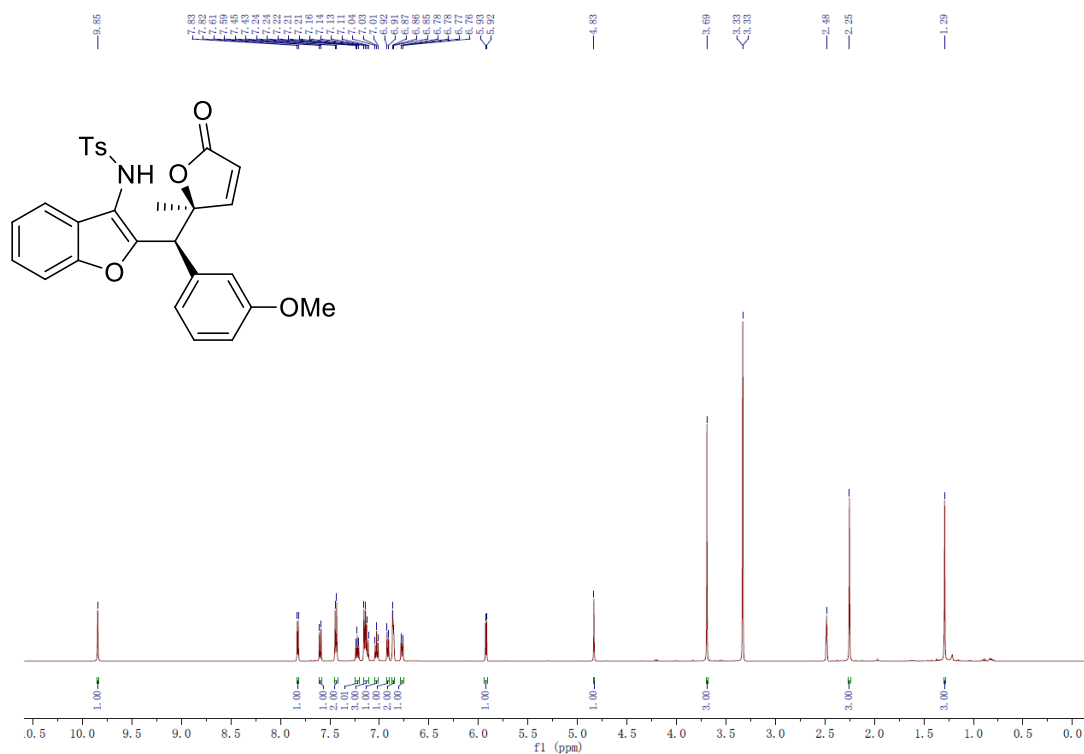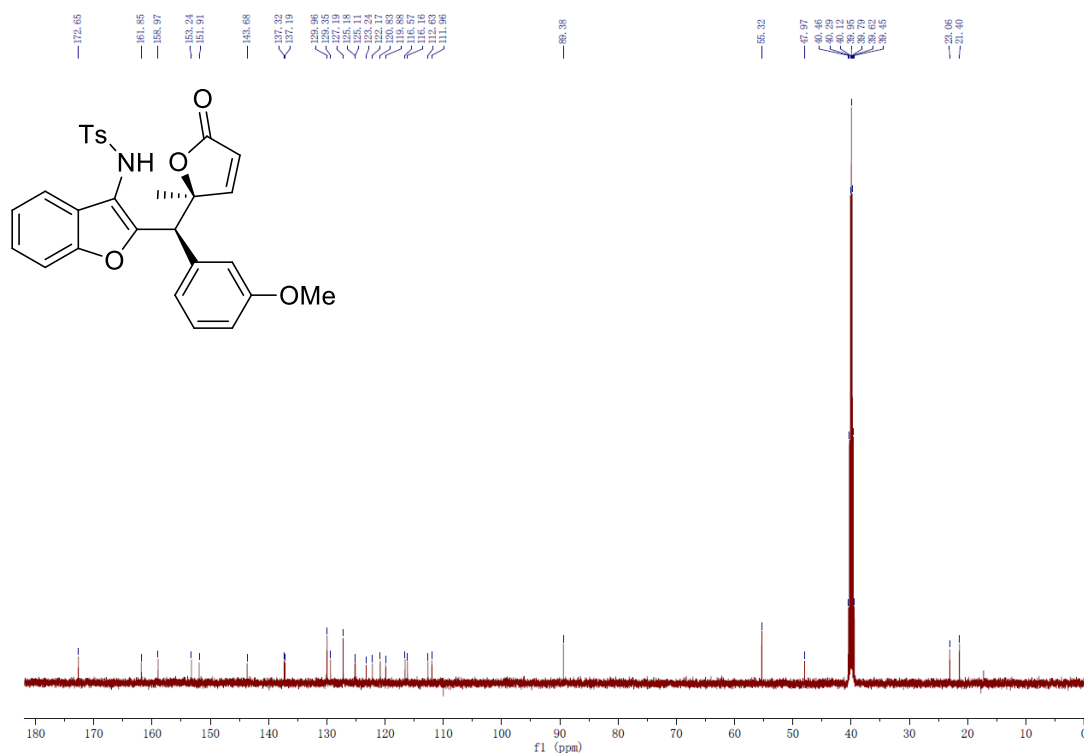

**4-Methyl-N-(2-((R)-((S)-2-methyl-5-oxo-2,5-dihydrofuran-2-yl)(o-tolyl)methyl)benzofuran-3-yl)benzenesulfonamide (3la)**

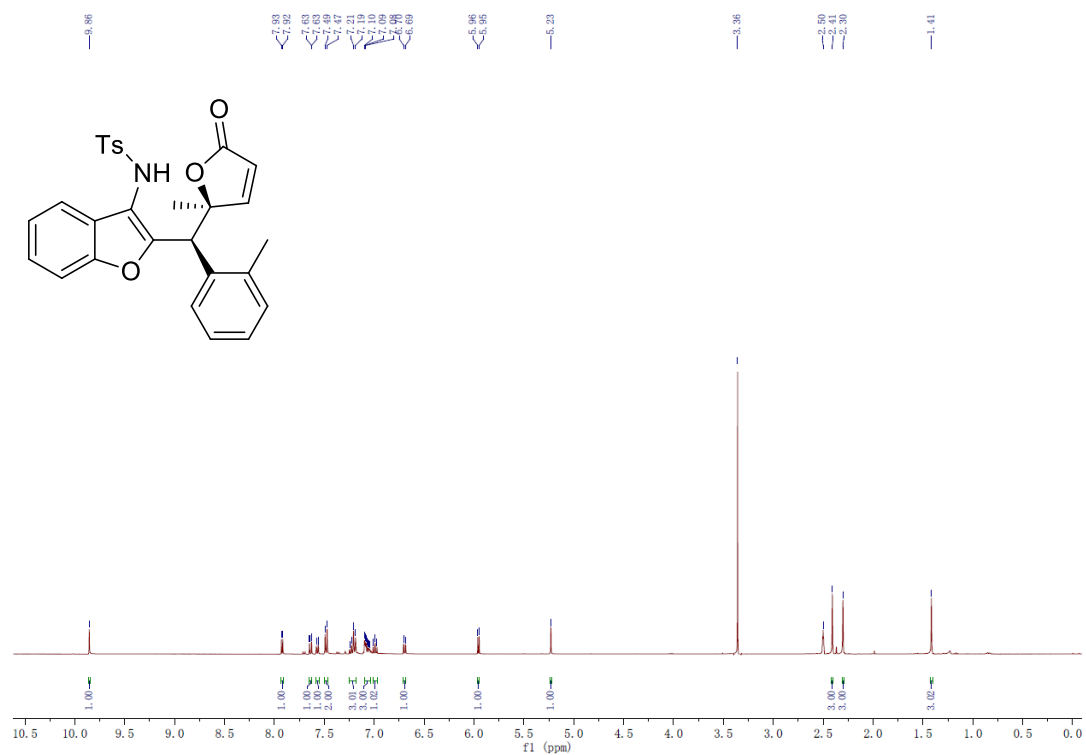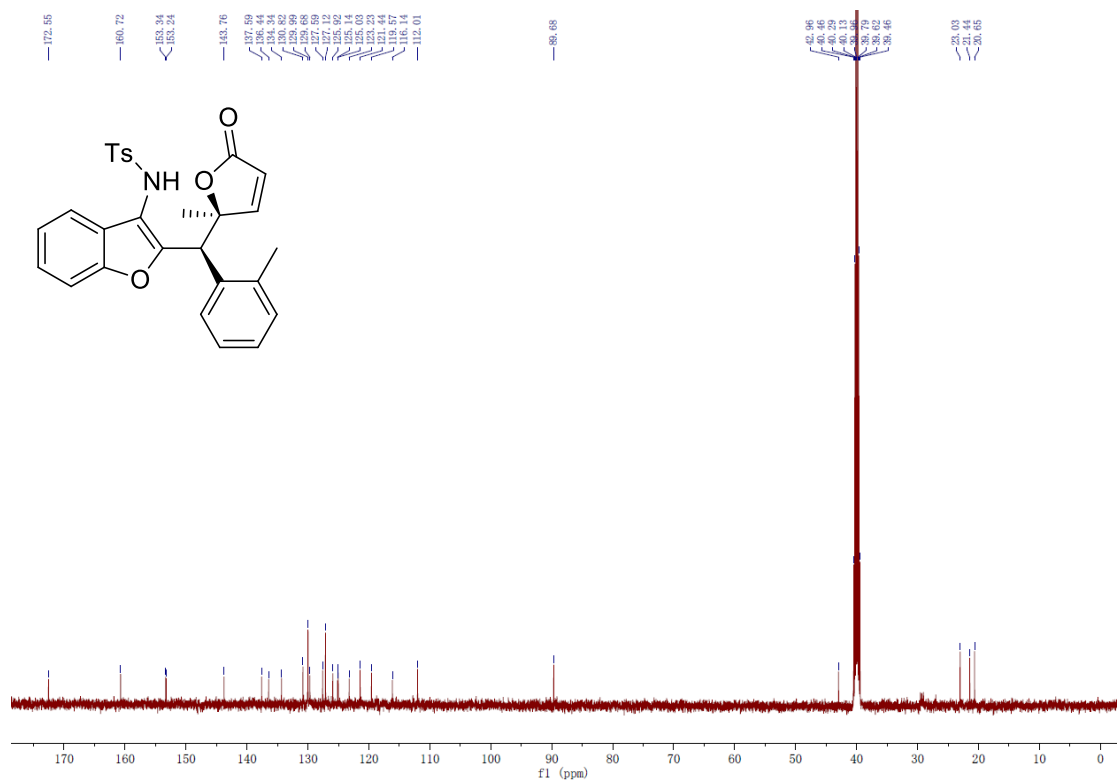



**4-Methyl-N-(2-((R)-((S)-2-methyl-5-oxo-2,5-dihydrofuran-2-yl)(thiophen-2-yl)methyl)benzofuran-3-yl)benzenesulfonamide (3ma)**

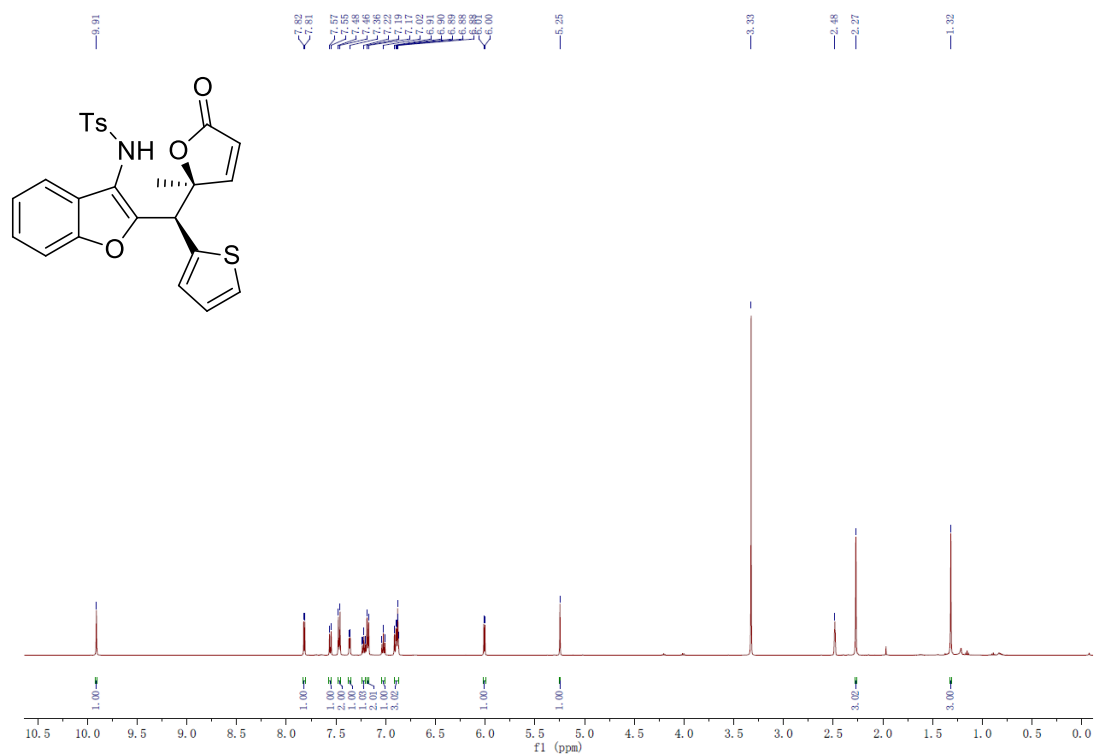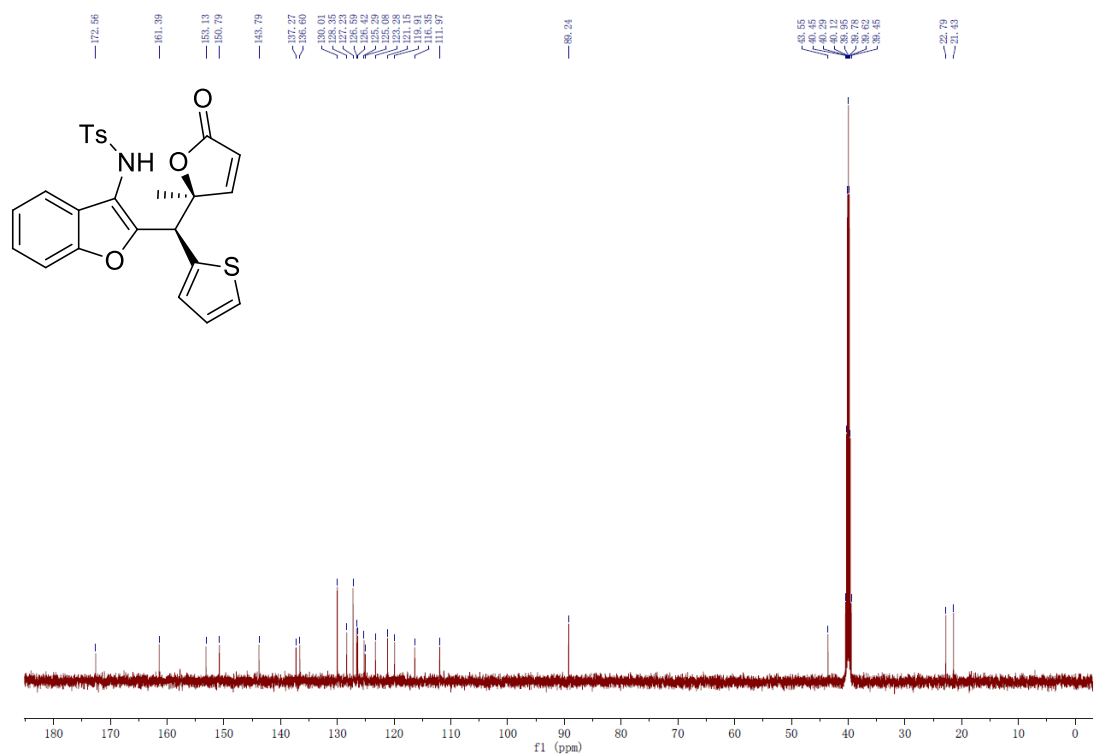

***N*-2-((*R*)-((*S*)-2-methyl-5-oxo-2,5-dihydrofuran-2-yl)(phenyl)methyl)benzofuran-3-yl)benzenesulfonamide (3na)**

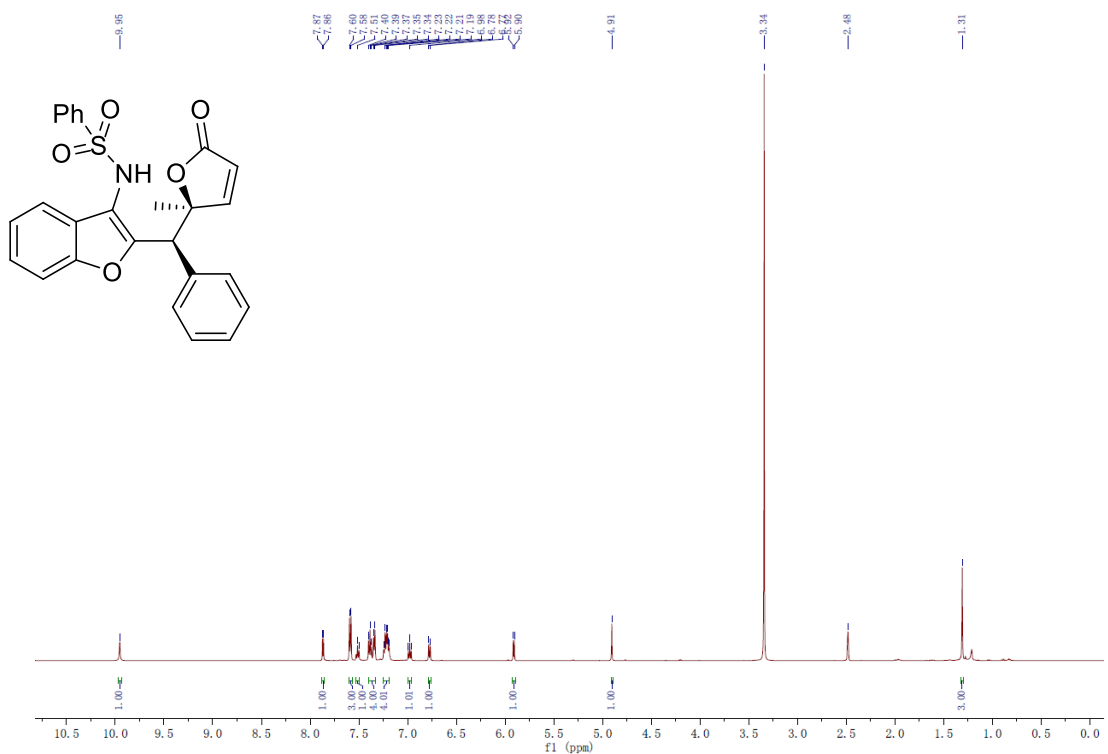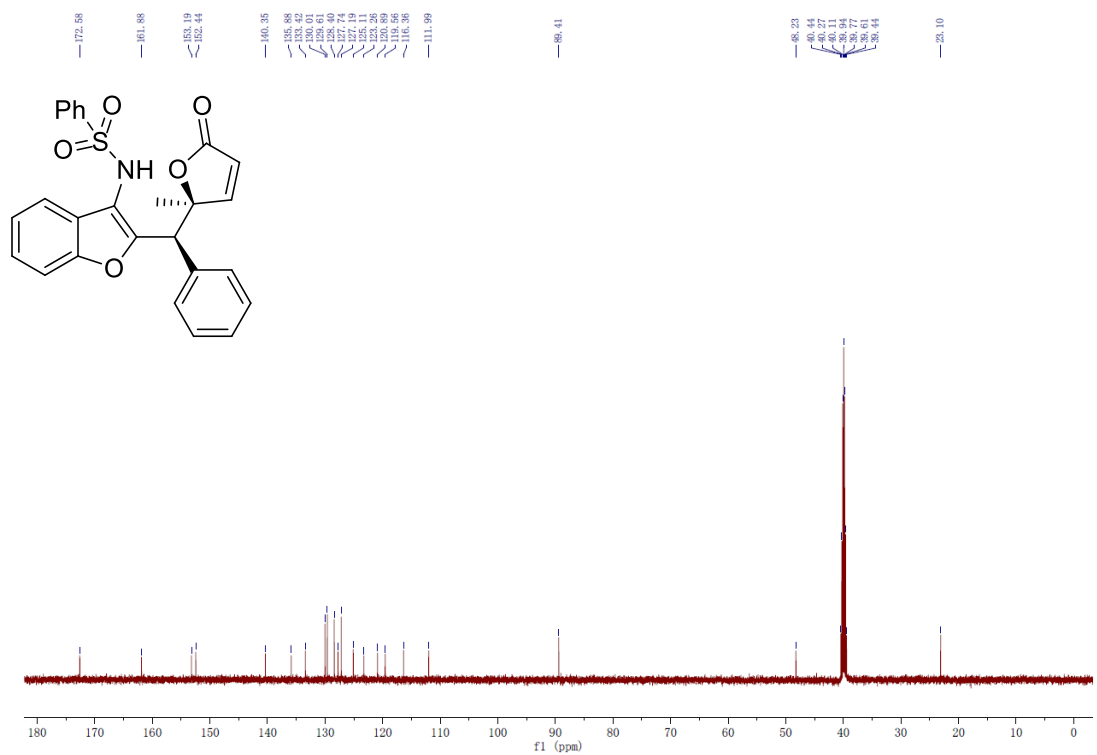

***N*-2-((*R*)-((*S*)-2-ethyl-5-oxo-2,5-dihydrofuran-2-yl)(phenyl)methyl)benzofuran-3-yl)-4-methylbenzenesulfonamide (3ab)**

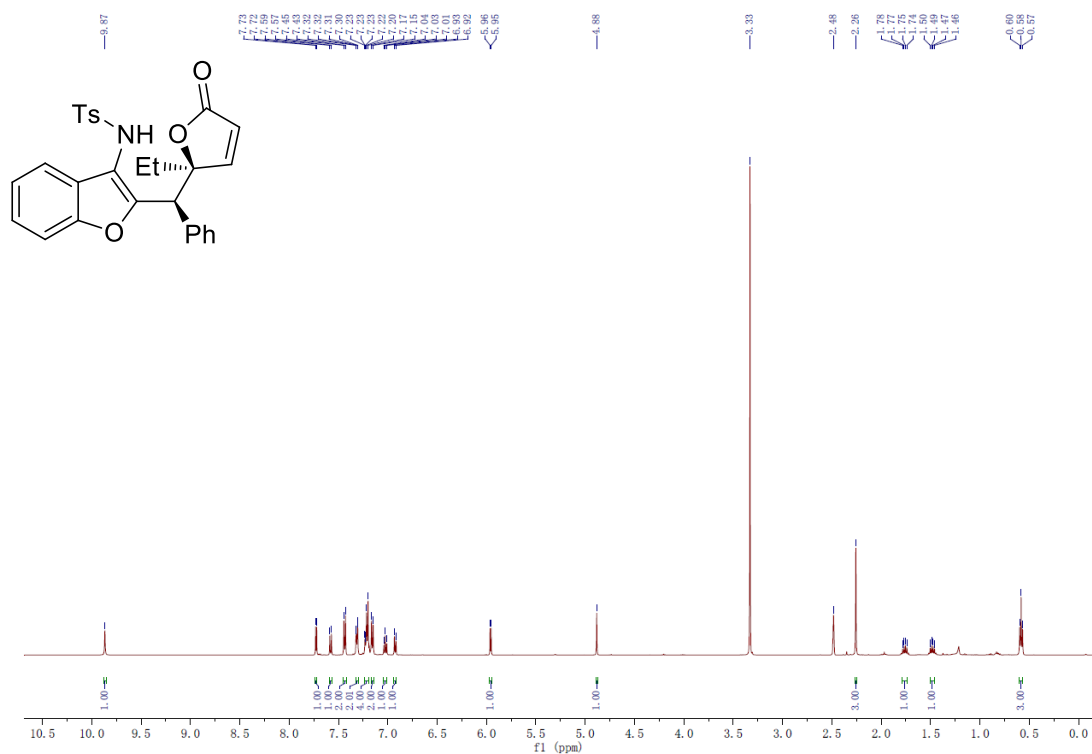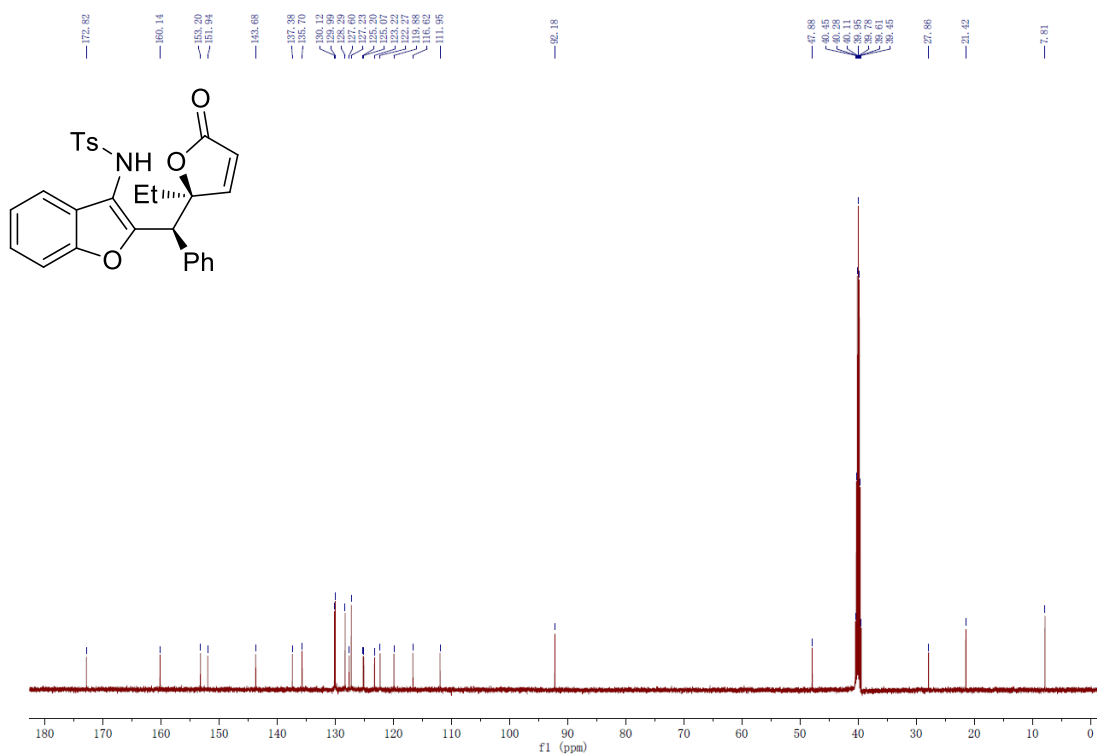

***N*-2-((*R*)-((*S*)-2-benzyl-5-oxo-2,5-dihydrofuran-2-yl)(phenyl)methyl)benzofuran-3-yl)-4-methylbenzenesulfonamide (3ac)**

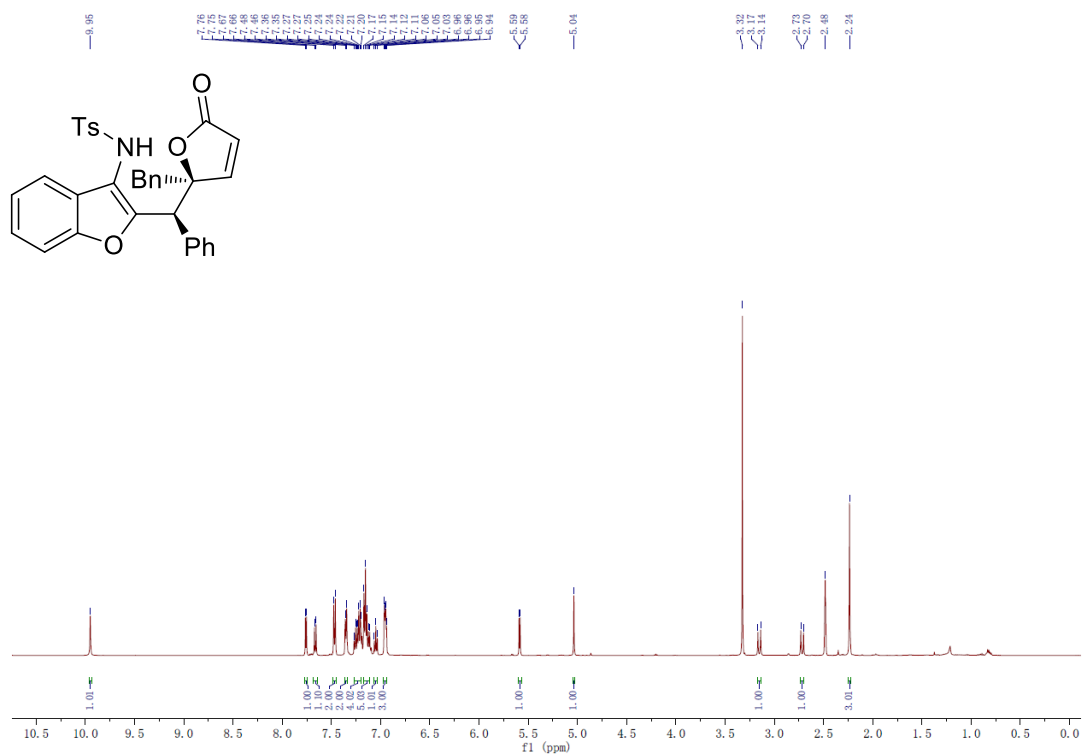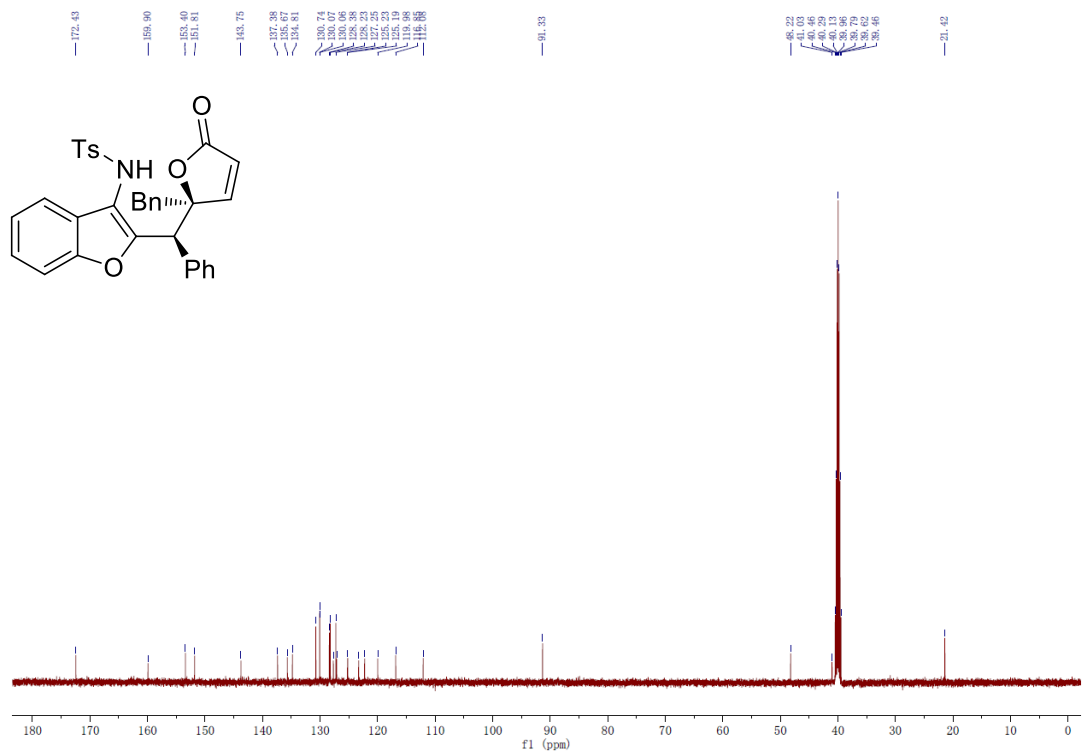

**4-Methyl-N-(2-((R)-(S)-5-oxo-2-propyl-2,5-dihydrofuran-2-yl)(phenyl)methyl)benzenesulfonamide (3ad)**

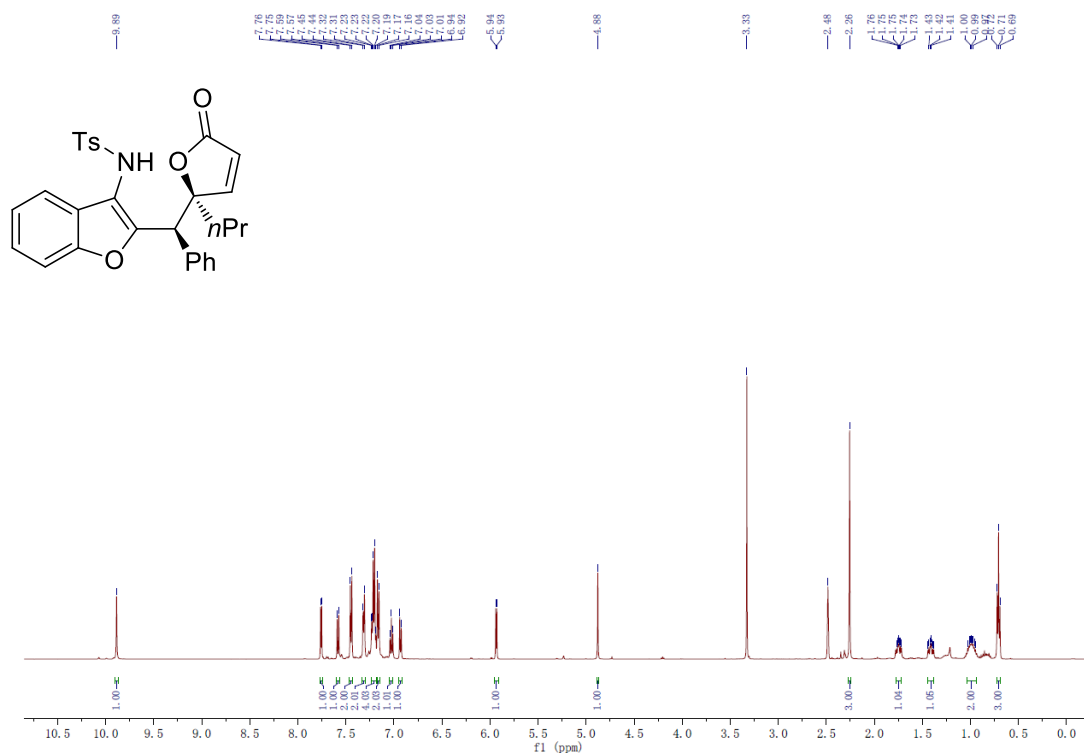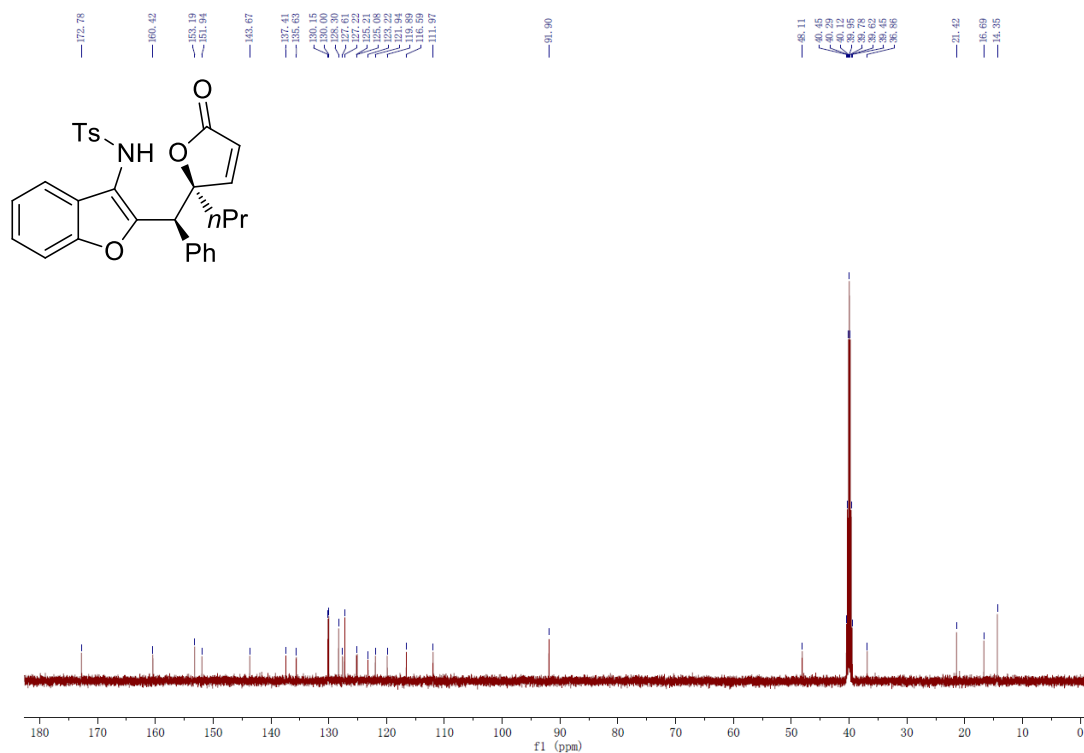

**4-Methyl-N-(2-((R)-(S)-5-oxo-2-phenyl-2,5-dihydrofuran-2-yl)(phenyl)methyl)benzenesulfonamide (3ae)**

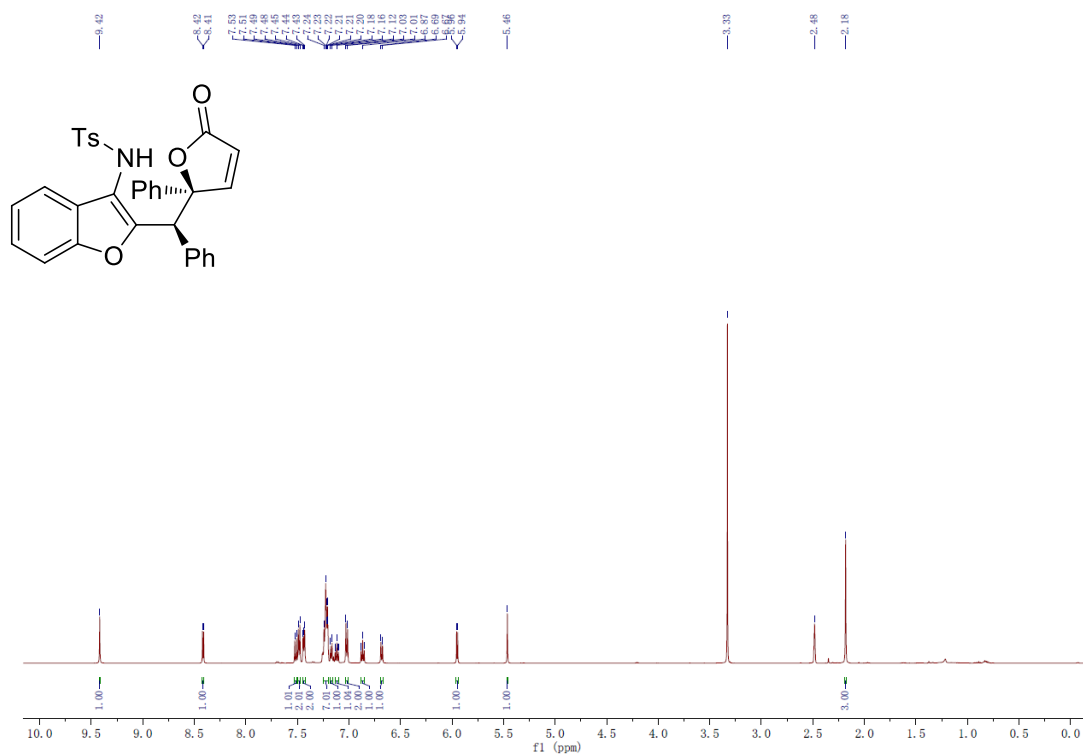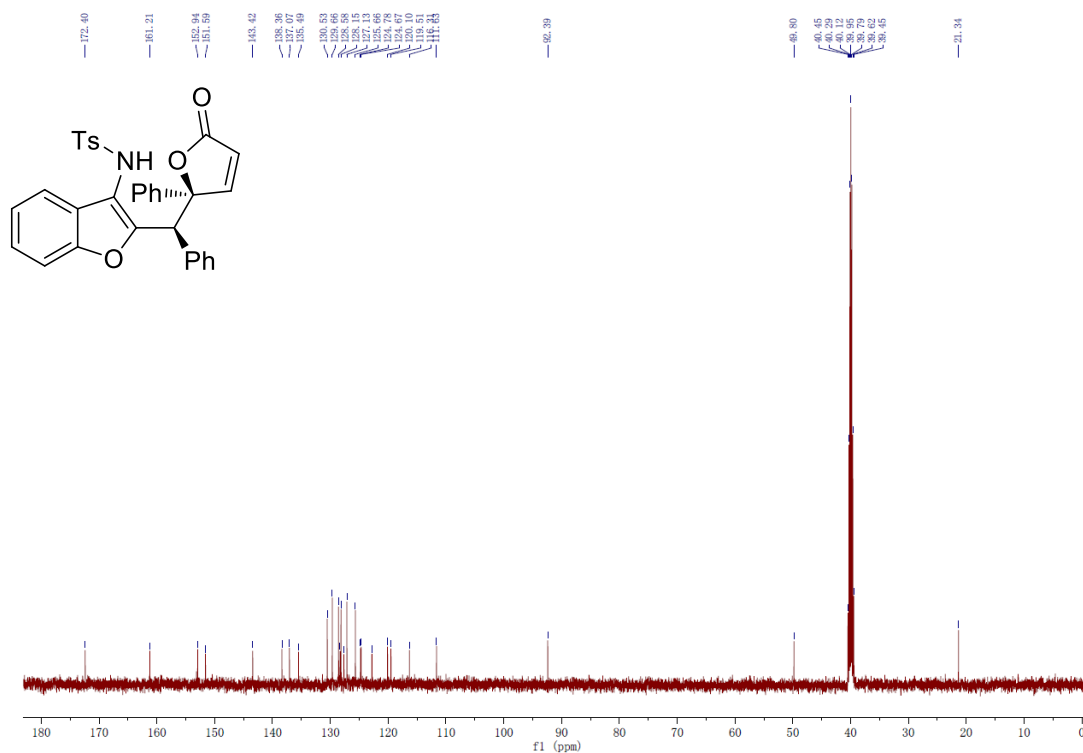

***N*-2-((*R*)-((*S*)-2-(4-fluorophenyl)-5-oxo-2,5-dihydrofuran-2-yl)(phenyl)methyl)benzofuran-3-yl)-4-methylbenzenesulfonamide (3af)**

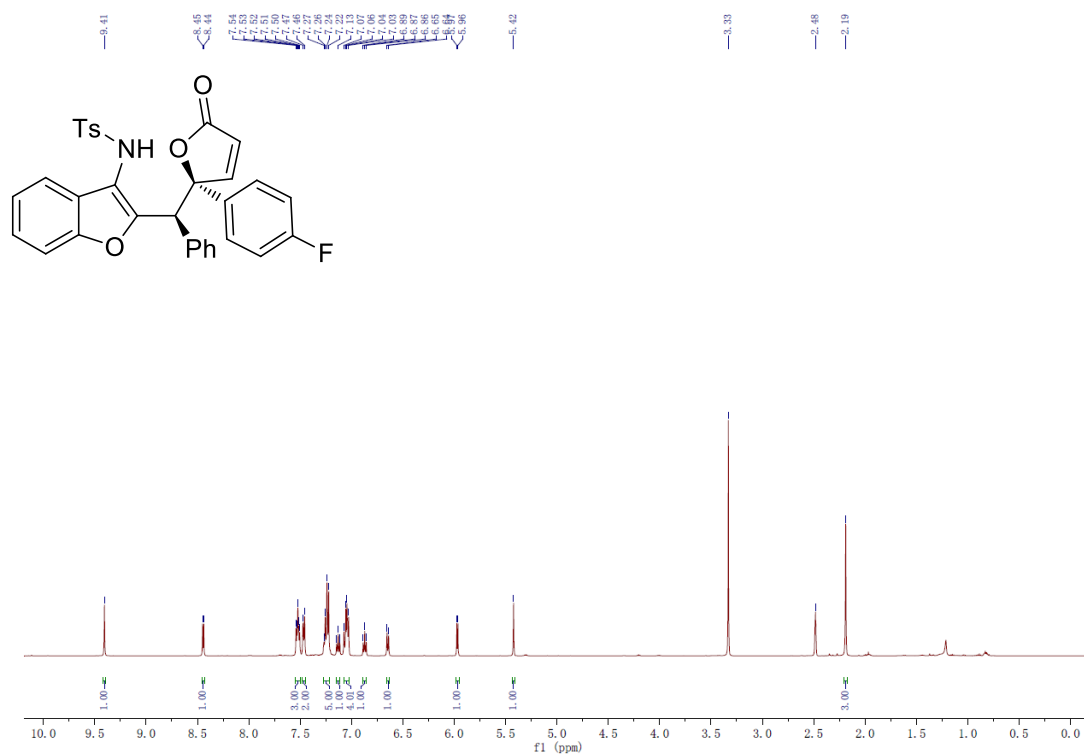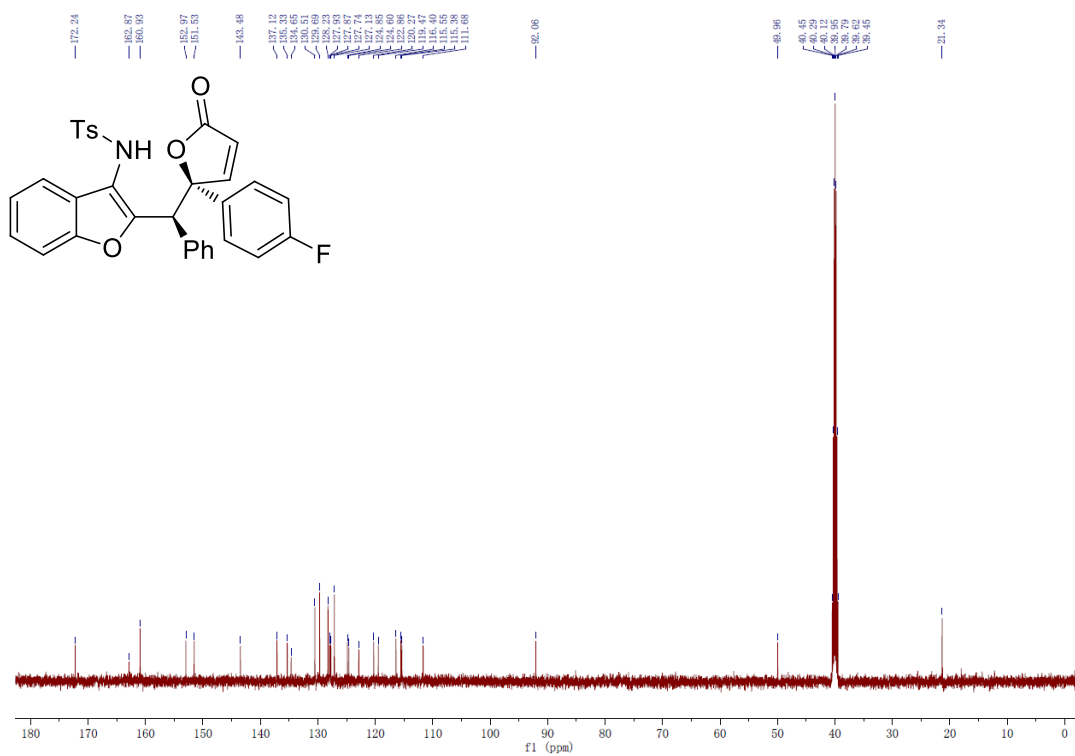

***N*-2-((*R*)-((*S*)-2-(4-methoxyphenyl)-5-oxo-2,5-dihydrofuran-2-yl)(phenyl)methyl)benzofuran-3-yl)-4-methylbenzenesulfonamide (3ag)**

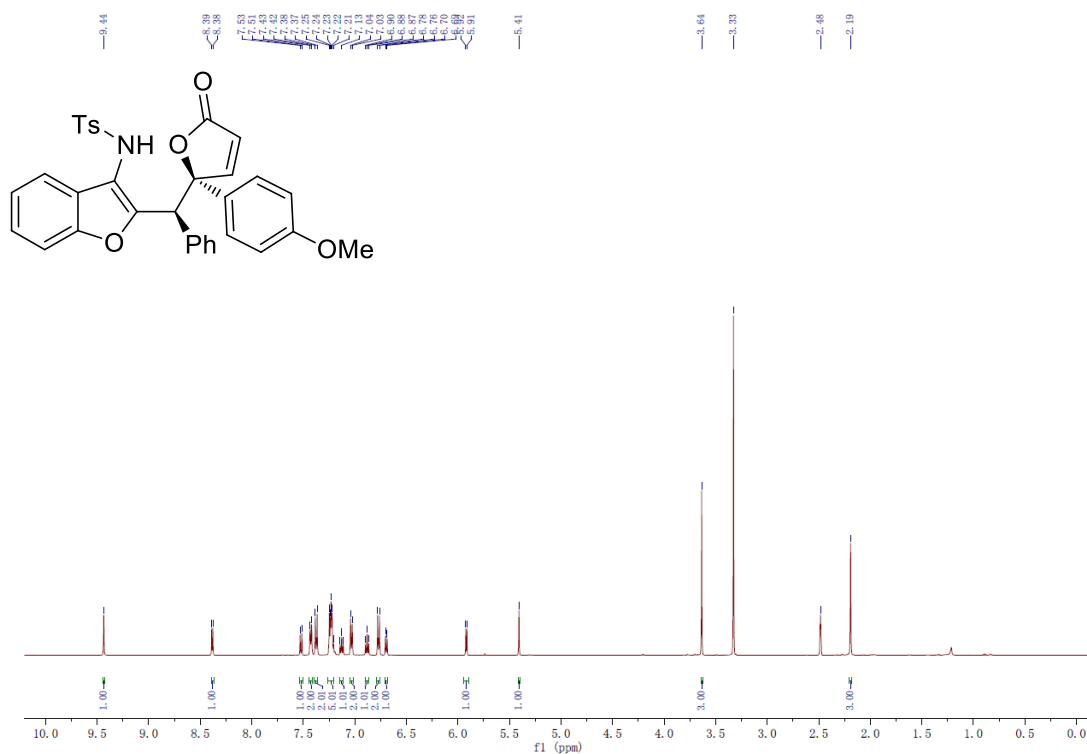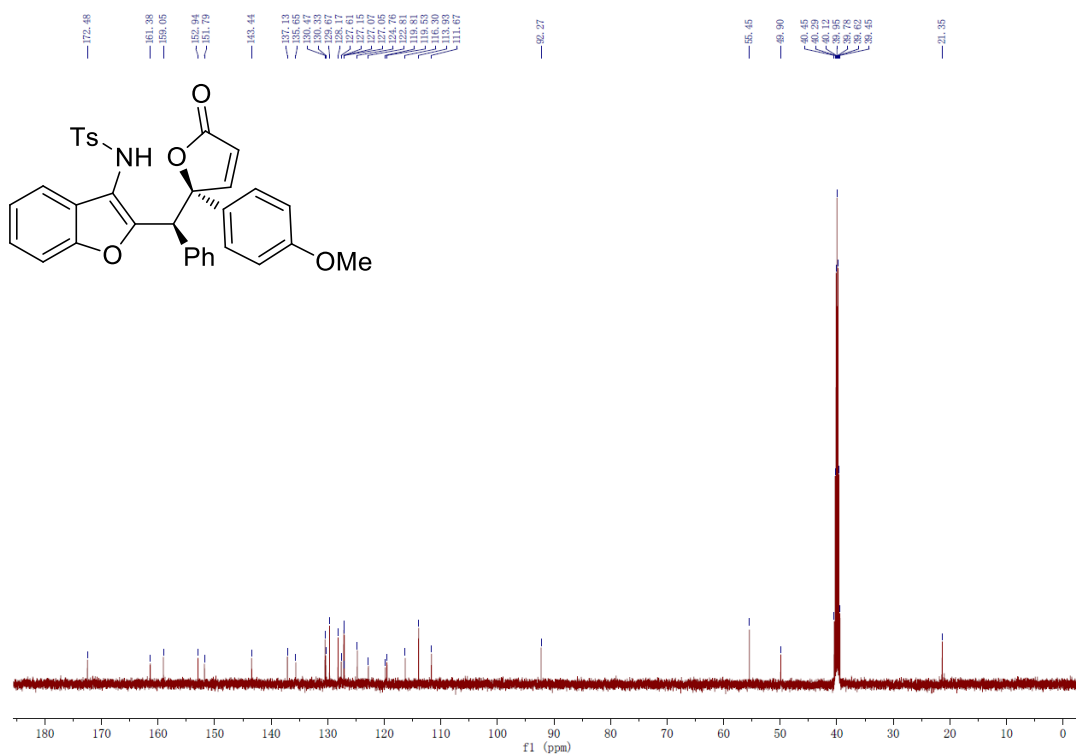



***N*-2-((*R*)-((*S*)-2-ethyl-4-methyl-5-oxo-2,5-dihydrofuran-2-yl)(phenyl)methyl)benzofuran-3-yl)-4-methylbenzenesulfonamide (3ah)**

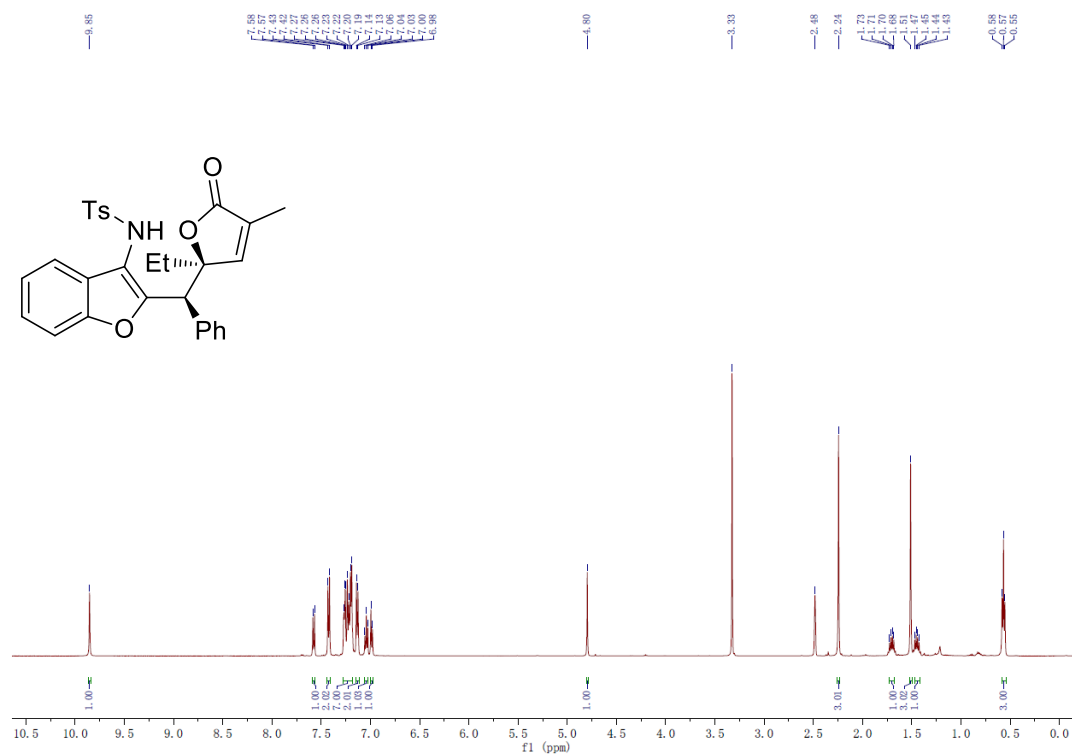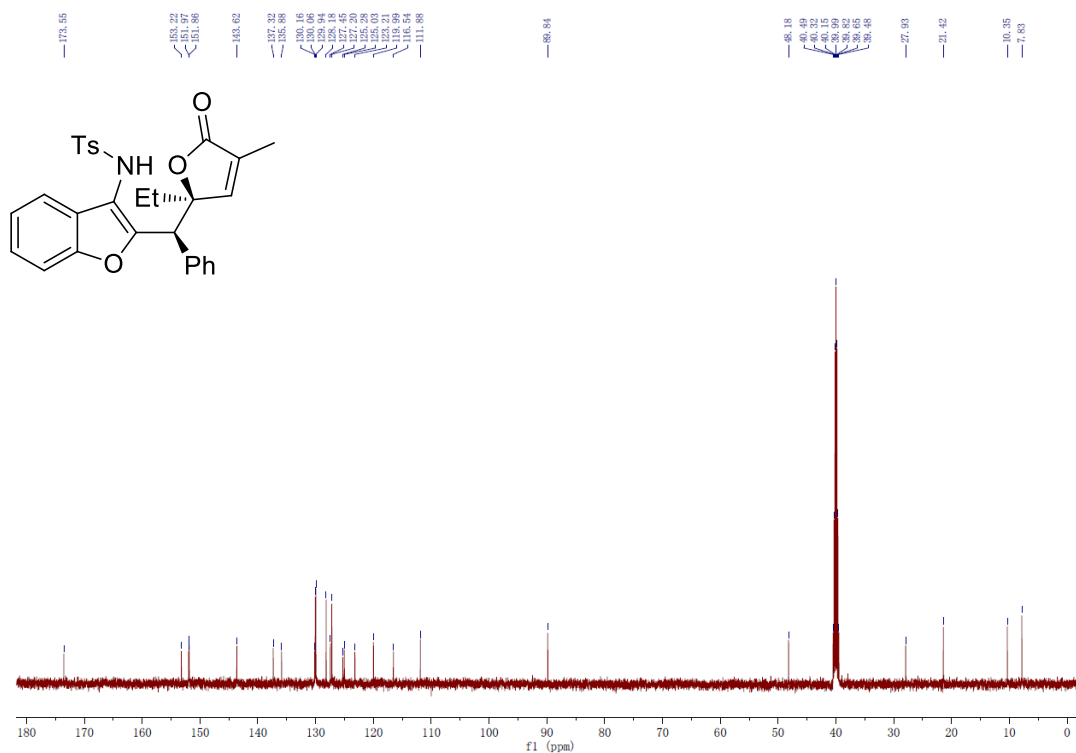

## H: X-ray Analysis

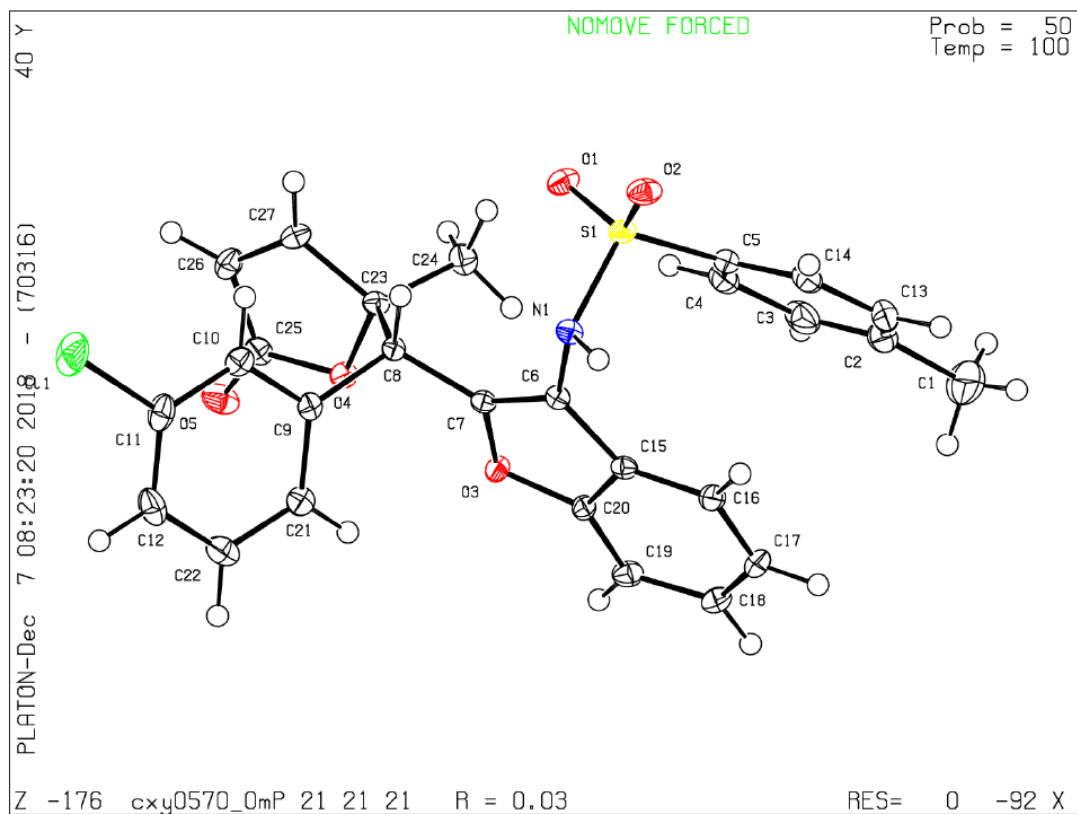

CCDC: 1905200 (**3ha**)

Table 1 Crystal data and structure refinement for 3ha.

|                                          |                                                     |                                                     |                 |
|------------------------------------------|-----------------------------------------------------|-----------------------------------------------------|-----------------|
| Identification code                      | 3ha                                                 |                                                     |                 |
| Bond precision:                          | C-C = 0.0031 Å                                      | Wavelength = 0.71073                                |                 |
| Cell:                                    | a = 10.1603(5)                                      | b = 10.1730(4)                                      | c = 23.5179(10) |
|                                          | alpha = 90                                          | beta = 90                                           | gamma = 90      |
| Temperature:                             | 100 K                                               |                                                     |                 |
|                                          | Calculated                                          | Reported                                            |                 |
| Volume                                   | 2430.83(18)                                         | 2430.83(18)                                         |                 |
| Space group                              | P 21 21 21                                          | P 21 21 21                                          |                 |
| Hall group                               | P 2ac 2ab                                           | P 2ac 2ab                                           |                 |
| Moiety formula                           | C <sub>27</sub> H <sub>22</sub> ClNO <sub>5</sub> S | C <sub>27</sub> H <sub>22</sub> ClNO <sub>5</sub> S |                 |
| Sum formula                              | C <sub>27</sub> H <sub>22</sub> ClNO <sub>5</sub> S | C <sub>27</sub> H <sub>22</sub> ClNO <sub>5</sub> S |                 |
| Mr                                       | 507.97                                              | 507.96                                              |                 |
| Dx, g cm <sup>-3</sup>                   | 1.388                                               | 1.388                                               |                 |
| Z                                        | 4                                                   | 4                                                   |                 |
| Mu (mm <sup>-1</sup> )                   | 0.282                                               | 0.282                                               |                 |
| F000                                     | 1056.0                                              | 1056.0                                              |                 |
| F000'                                    | 1057.56                                             |                                                     |                 |
| h,k,lmax                                 | 13,13,30                                            | 13,13,30                                            |                 |
| Nref                                     | 5614[ 3181]                                         | 5612                                                |                 |
| Tmin,Tmax                                | 0.898,0.921                                         | 0.692,0.746                                         |                 |
| Tmin'                                    | 0.898                                               |                                                     |                 |
| Correction method = # Reported T Limits: | Tmin = 0.692 Tmax = 0.746                           |                                                     |                 |
| AbsCorr = MULTI-SCAN                     |                                                     |                                                     |                 |
| Data completeness = 1.76/1.00            | Theta(max) = 27.556                                 |                                                     |                 |
| R(reflections) = 0.0274( 5340)           | wR2(reflections) = 0.0674( 5612)                    |                                                     |                 |
| S = 1.041                                | Npar = 319                                          |                                                     |                 |

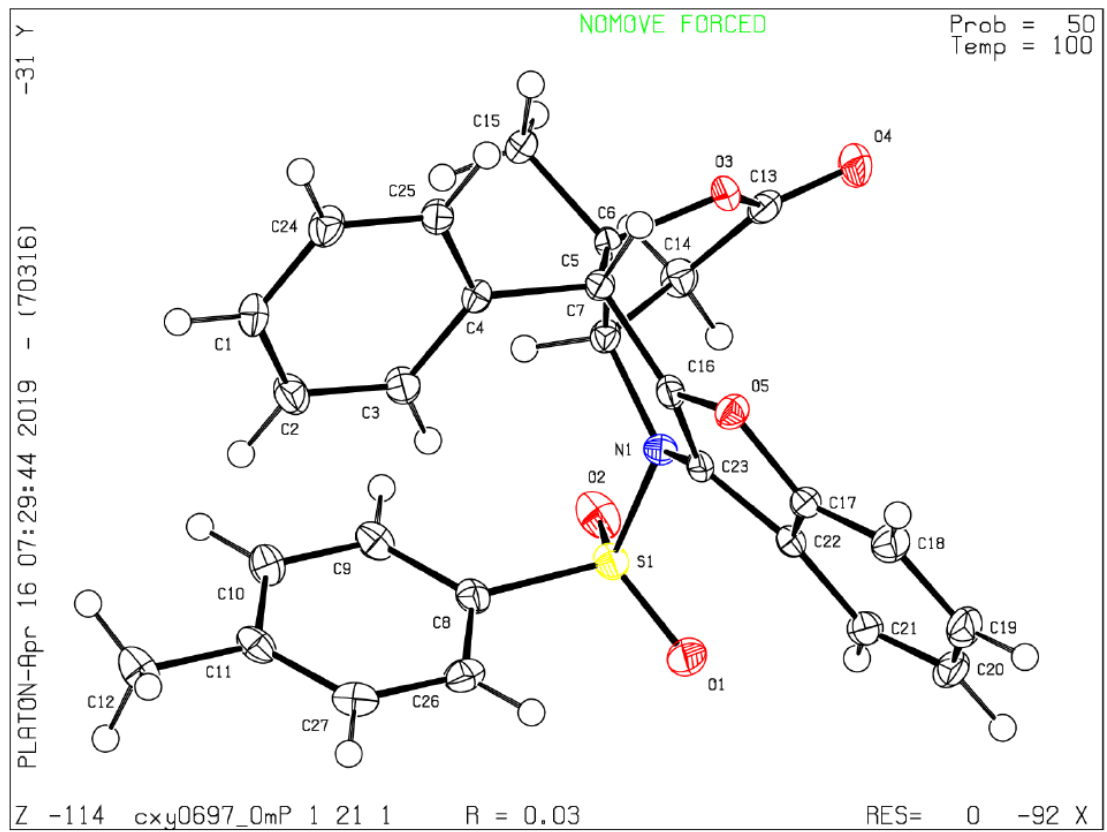

CCDC: 1910685 (**4aa**)

**Table 2 Crystal data and structure refinement for 4aa.**

|                                             |                                                               |
|---------------------------------------------|---------------------------------------------------------------|
| Identification code                         | <b>4aa</b>                                                    |
| Empirical formula                           | C <sub>27</sub> H <sub>23</sub> NO <sub>5</sub> S             |
| Formula weight                              | 473.52                                                        |
| Temperature/K                               | 100.0                                                         |
| Crystal system                              | monoclinic                                                    |
| Space group                                 | P2 <sub>1</sub>                                               |
| a/Å                                         | 10.0757(11)                                                   |
| b/Å                                         | 10.4448(9)                                                    |
| c/Å                                         | 10.8094(12)                                                   |
| α/°                                         | 90                                                            |
| β/°                                         | 92.786(3)                                                     |
| γ/°                                         | 90                                                            |
| Volume/Å <sup>3</sup>                       | 1136.2(2)                                                     |
| Z                                           | 2                                                             |
| ρ <sub>calc</sub> /g/cm <sup>3</sup>        | 1.384                                                         |
| μ/mm <sup>-1</sup>                          | 0.183                                                         |
| F(000)                                      | 496.0                                                         |
| Crystal size/mm <sup>3</sup>                | 0.42 × 0.36 × 0.29                                            |
| Radiation                                   | MoKα (λ = 0.71073)                                            |
| 2Θ range for data collection/°              | 5.398 to 55.084                                               |
| Index ranges                                | -13 ≤ h ≤ 12, -13 ≤ k ≤ 13, -14 ≤ l ≤ 13                      |
| Reflections collected                       | 16350                                                         |
| Independent reflections                     | 5233 [R <sub>int</sub> = 0.0217, R <sub>sigma</sub> = 0.0225] |
| Data/restraints/parameters                  | 5233/1/310                                                    |
| Goodness-of-fit on F <sup>2</sup>           | 1.031                                                         |
| Final R indexes [I >= 2σ (I)]               | R <sub>1</sub> = 0.0280, wR <sub>2</sub> = 0.0705             |
| Final R indexes [all data]                  | R <sub>1</sub> = 0.0293, wR <sub>2</sub> = 0.0714             |
| Largest diff. peak/hole / e Å <sup>-3</sup> | 0.26/-0.23                                                    |
| Flack parameter                             | 0.01(2)                                                       |

## I: Reference

1. Z. Q. Rong, L. C. Yang, S. Liu, Z. Yu, Y. N. Wang, Z. Y. Tan, R. Z. Huang, Y. Lan, and Y. Zhao, *J. Am. Chem. Soc.* **2017**, *139*, 15304.
2. B. Wu, Z. Yu, X. Gao, Y. Lan and Y. Zhou, *Angew. Chem. Int. Ed.* **2017**, *56*, 4006.
